# Supplementary material
Source: publisher figshare collection journal article supplement (https://rs.figshare.com/ndownloader/files/17842850)
Supplement: Supplementary file 1 [file 17842850]

50	0.01	0.01	1	-1	0.03	0.04	0.04	0.1	10	1	10783	0.27491
50	0.01	0.01	1	-1	0.03	0.04	0.2	0.1	10	1	10788	0.30191
50	0.01	0.01	1	-1	0.03	0.04	0.8	0.1	10	1	10719	0.39064
50	0.01	0.01	1	-1	0.03	0.04	1.2	0.1	10	1	10678	0.43136
50	0.01	0.01	1	-1	0.03	0.04	1.6	0.1	10	1	10582	0.463
50	0.01	0.01	1	-1	0.03	0.04	2	0.1	10	1	10244	0.49491
50	0.1	0.01	1	-1	0.03	0.04	0.04	0.1	10	1	9091.4	0.39173
50	0.1	0.01	1	-1	0.03	0.04	0.2	0.1	10	1	9284.5	0.47518
50	0.1	0.01	1	-1	0.03	0.04	0.8	0.1	10	1	8698	0.72255
50	0.1	0.01	1	-1	0.03	0.04	1.2	0.1	10	1	8109.6	0.80427
50	0.1	0.01	1	-1	0.03	0.04	1.6	0.1	10	1	7530.8	0.847
50	0.1	0.01	1	-1	0.03	0.04	2	0.1	10	1	7076.1	0.87709
50	0.2	0.01	1	-1	0.03	0.04	0.04	0.1	10	1	9377.5	0.43682
50	0.2	0.01	1	-1	0.03	0.04	0.2	0.1	10	1	9456.3	0.53827
50	0.2	0.01	1	-1	0.03	0.04	0.8	0.1	10	1	8339.3	0.79009
50	0.2	0.01	1	-1	0.03	0.04	1.2	0.1	10	1	7686.8	0.86673
50	0.2	0.01	1	-1	0.03	0.04	1.6	0.1	10	1	6909.6	0.90355
50	0.2	0.01	1	-1	0.03	0.04	2	0.1	10	1	6603.1	0.92564
50	0.3	0.01	1	-1	0.03	0.04	0.04	0.1	10	1	9864.2	0.46791
50	0.3	0.01	1	-1	0.03	0.04	0.2	0.1	10	1	9800.3	0.57927
50	0.3	0.01	1	-1	0.03	0.04	0.8	0.1	10	1	8733.7	0.80027
50	0.3	0.01	1	-1	0.03	0.04	1.2	0.1	10	1	8037.6	0.86882
50	0.3	0.01	1	-1	0.03	0.04	1.6	0.1	10	1	7478.5	0.90591
50	0.3	0.01	1	-1	0.03	0.04	2	0.1	10	1	6910.4	0.92964
50	0.4	0.01	1	-1	0.03	0.04	0.04	0.1	10	1	10236	0.49564
50	0.4	0.01	1	-1	0.03	0.04	0.2	0.1	10	1	10345	0.58109
50	0.4	0.01	1	-1	0.03	0.04	0.8	0.1	10	1	9567.6	0.78336
50	0.4	0.01	1	-1	0.03	0.04	1.2	0.1	10	1	8840.7	0.85082
50	0.4	0.01	1	-1	0.03	0.04	1.6	0.1	10	1	8218.5	0.891
50	0.4	0.01	1	-1	0.03	0.04	2	0.1	10	1	7864.5	0.90955
50	0.5	0.01	1	-1	0.03	0.04	0.04	0.1	10	1	10985	0.51418
50	0.5	0.01	1	-1	0.03	0.04	0.2	0.1	10	1	11023	0.58964
50	0.5	0.01	1	-1	0.03	0.04	0.8	0.1	10	1	10335	0.74691
50	0.5	0.01	1	-1	0.03	0.04	1.2	0.1	10	1	9945.4	0.82164
50	0.5	0.01	1	-1	0.03	0.04	1.6	0.1	10	1	9418.9	0.85927
50	0.5	0.01	1	-1	0.03	0.04	2	0.1	10	1	9076.9	0.88327
50	0.6	0.01	1	-1	0.03	0.04	0.04	0.1	10	1	11484	0.53464
50	0.6	0.01	1	-1	0.03	0.04	0.2	0.1	10	1	11575	0.57673
50	0.6	0.01	1	-1	0.03	0.04	0.8	0.1	10	1	11451	0.70918
50	0.6	0.01	1	-1	0.03	0.04	1.2	0.1	10	1	11423	0.75627
50	0.6	0.01	1	-1	0.03	0.04	1.6	0.1	10	1	10981	0.79191
50	0.6	0.01	1	-1	0.03	0.04	2	0.1	10	1	10700	0.81691
50	0.7	0.01	1	-1	0.03	0.04	0.04	0.1	10	1	12158	0.54936
50	0.7	0.01	1	-1	0.03	0.04	0.2	0.1	10	1	12283	0.569
50	0.7	0.01	1	-1	0.03	0.04	0.8	0.1	10	1	12191	0.62909
50	0.7	0.01	1	-1	0.03	0.04	1.2	0.1	10	1	12613	0.65591
50	0.7	0.01	1	-1	0.03	0.04	1.6	0.1	10	1	12640	0.68227
50	0.7	0.01	1	-1	0.03	0.04	2	0.1	10	1	12514	0.68464
50	0.8	0.01	1	-1	0.03	0.04	0.04	0.1	10	1	12625	0.56718
50	0.8	0.01	1	-1	0.03	0.04	0.2	0.1	10	1	12659	0.54791
50	0.8	0.01	1	-1	0.03	0.04	0.8	0.1	10	1	13146	0.50827
50	0.8	0.01	1	-1	0.03	0.04	1.2	0.1	10	1	13103	0.49355
50	0.8	0.01	1	-1	0.03	0.04	1.6	0.1	10	1	13440	0.48536
50	0.8	0.01	1	-1	0.03	0.04	2	0.1	10	1	13347	0.47255
50	0.9	0.01	1	-1	0.03	0.04	0.04	0.1	10	1	12887	0.58273
50	0.9	0.01	1	-1	0.03	0.04	0.2	0.1	10	1	13092	0.51464
50	0.9	0.01	1	-1	0.03	0.04	0.8	0.1	10	1	12367	0.333
50	0.9	0.01	1	-1	0.03	0.04	1.2	0.1	10	1	11740	0.25655
50	0.9	0.01	1	-1	0.03	0.04	1.6	0.1	10	1	10723	0.18782
50	0.9	0.01	1	-1	0.03	0.04	2	0.1	10	1	9847.7	0.14764
50	0.99	0.01	1	-1	0.03	0.04	0.04	0.1	10	1	12653	0.65918
50	0.99	0.01	1	-1	0.03	0.04	0.2	0.1	10	1	12884	0.43418
50	0.99	0.01	1	-1	0.03	0.04	0.8	0.1	10	1	6260.5	0.033273
50	0.99	0.01	1	-1	0.03	0.04	1.2	0.1	10	1	3873.1	0.0054545
50	0.99	0.01	1	-1	0.03	0.04	1.6	0.1	10	1	2706.8	0.0018182
50	0.99	0.01	1	-1	0.03	0.04	2	0.1	10	1	2078	0.00054545
50	0.01	0.01	1	-1	0.03	0.04	0.04	0.5	10	1	10111	0.307
50	0.01	0.01	1	-1	0.03	0.04	0.2	0.5	10	1	10016	0.33745
50	0.01	0.01	1	-1	0.03	0.04	0.8	0.5	10	1	10143	0.45582
50	0.01	0.01	1	-1	0.03	0.04	1.2	0.5	10	1	9787.2	0.49845
50	0.01	0.01	1	-1	0.03	0.04	1.6	0.5	10	1	9458.7	0.53009
50	0.01	0.01	1	-1	0.03	0.04	2	0.5	10	1	9527.8	0.54491
50	0.1	0.01	1	-1	0.03	0.04	0.04	0.5	10	1	6252.6	0.92036
50	0.1	0.01	1	-1	0.03	0.04	0.2	0.5	10	1	6126.7	0.93782
50	0.1	0.01	1	-1	0.03	0.04	0.8	0.5	10	1	5490.5	0.95564
50	0.1	0.01	1	-1	0.03	0.04	1.2	0.5	10	1	5290.9	0.96282
50	0.1	0.01	1	-1	0.03	0.04	1.6	0.5	10	1	5223.9	0.96291
50	0.1	0.01	1	-1	0.03	0.04	2	0.5	10	1	5108.1	0.96564
50	0.2	0.01	1	-1	0.03	0.04	0.04	0.5	10	1	4777.9	0.97464
50	0.2	0.01	1	-1	0.03	0.04	0.2	0.5	10	1	4713.4	0.97818
50	0.2	0.01	1	-1	0.03	0.04	0.8	0.5	10	1	4502.1	0.986
50	0.2	0.01	1	-1	0.03	0.04	1.2	0.5	10	1	4352.6	0.98355
50	0.2	0.01	1	-1	0.03	0.04	1.6	0.5	10	1	4345	0.98573
50	0.2	0.01	1	-1	0.03	0.04	2	0.5	10	1	4255.3	0.98845
50	0.3	0.01	1	-1	0.03	0.04	0.04	0.5	10	1	4124.8	0.98773
50	0.3	0.01	1	-1	0.03	0.04	0.2	0.5	10	1	4108.4	0.99055
50	0.3	0.01	1	-1	0.03	0.04	0.8	0.5	10	1	4205.6	0.99018
50	0.3	0.01	1	-1	0.03	0.04	1.2	0.5	10	1	4199	0.9917
50	0.3	0.01	1	-1	0.03	0.04	1.6	0.5	10	1	4266.3	0.99091
50	0.3	0.01	1	-1	0.03	0.04	2	0.5	10	1	4246.9	0.9923
50	0.4	0.01	1	-1	0.03	0.04	0.04	0.5	10	1	3744.7	0.99391
50	0.4	0.01	1	-1	0.03	0.04	0.2	0.5	10	1	3788.6	0.99373
50	0.4	0.01	1	-1	0.03	0.04	0.8	0.5	10	1	4205.4	0.99436
50	0.4	0.01	1	-1	0.03	0.04	1.2	0.5	10	1	4305.4	0.99255
50	0.4	0.01	1	-1	0.03	0.04	1.6	0.5	10	1	4434.4	0.99218
50	0.4	0.01	1	-1	0.03	0.04	2	0.5	10	1	4528.3	0.99073
50	0.5	0.01	1	-1	0.03	0.04	0.04	0.5	10	1	3450.6	0.99718
50	0.5	0.01	1	-1	0.03	0.04	0.2	0.5	10	1	3694.1	0.99682
50	0.5	0.01	1	-1	0.03	0.04	0.8	0.5	10	1	4305.7	0.99473
50	0.5	0.01	1	-1	0.03	0.04	1.2	0.5	10	1	4552.7	0.99191
50	0.5	0.01	1	-1	0.03	0.04	1.6	0.5	10	1	4817	0.99009
50	0.5	0.01	1	-1	0.03	0.04	2	0.5	10	1	4973	0.98936
50	0.6	0.01	1	-1	0.03	0.04	0.04	0.5	10	1	3263.7	0.99882
50	0.6	0.01	1	-1	0.03	0.04	0.2	0.5	10	1	3550.5	0.99745
50	0.6	0.01	1	-1	0.03	0.04	0.8	0.5	10	1	4464.5	0.99555
50	0.6	0.01	1	-1	0.03	0.04	1.2	0.5	10	1	4946.9	0.99236
50	0.6	0.01	1	-1	0.03	0.04	1.6	0.5	10	1	5364.5	0.98891
50	0.6	0.01	1	-1	0.03	0.04	2	0.5	10	1	5694.9	0.98655
50	0.7	0.01	1	-1	0.03	0.04	0.04	0.5	10	1	3087	0.99936
50	0.7	0.01	1	-1	0.03	0.04	0.2	0.5	10	1	3478.9	0.999
50	0.7	0.01	1	-1	0.03	0.04	0.8	0.5	10	1	4714	0.993
50	0.7	0.01	1	-1	0.03	0.04	1.2	0.5	10	1	5385	0.98973
50	0.7	0.01	1	-1	0.03	0.04	1.6	0.5	10	1	6076	0.98427
50	0.7	0.01	1	-1	0.03	0.04	2	0.5	10	1	6614.3	0.97855
50	0.8	0.01	1	-1	0.03	0.04	0.04	0.5	10	1	2879	0.99955
50	0.8	0.01	1	-1	0.03	0.04	0.2	0.5	10	1	3317.7	0.99927
50	0.8	0.01	1	-1	0.03	0.04	0.8	0.5	10	1	4975	0.99391
50	0.8	0.01	1	-1	0.03	0.04	1.2	0.5	10	1	6078.9	0.98545
50	0.8	0.01	1	-1	0.03	0.04	1.6	0.5	10	1	7130.9	0.97618
50	0.8	0.01	1	-1	0.03	0.04	2	0.5	10	1	8018.7	0.96391
50	0.9	0.01	1	-1	0.03	0.04	0.04	0.5	10	1	2558.2	0.99982
50	0.9	0.01	1	-1	0.03	0.04	0.2	0.5	10	1	3035.7	0.99864
50	0.9	0.01	1	-1	0.03	0.04	0.8	0.5	10	1	5216.5	0.99309
50	0.9	0.01	1	-1	0.03	0.04	1.2	0.5	10	1	6952.7	0.978
50	0.9	0.01	1	-1	0.03	0.04	1.6	0.5	10	1	8688.6	0.94636
50	0.9	0.01	1	-1	0.03	0.04	2	0.5	10	1	10318	0.89582
50	0.99	0.01	1	-1	0.03	0.04	0.04	0.5	10	1	1718.9	1
50	0.99	0.01	1	-1	0.03	0.04	0.2	0.5	10	1	2173.6	0.99964
50	0.99	0.01	1	-1	0.03	0.04	0.8	0.5	10	1	5579.1	0.98618
50	0.99	0.01	1	-1	0.03	0.04	1.2	0.5	10	1	10521	0.85073
50	0.99	0.01	1	-1	0.03	0.04	1.6	0.5	10	1	11965	0.40055
50	0.99	0.01	1	-1	0.03	0.04	2	0.5	10	1	7710.4	0.086182
50	0.01	0.01	1	-1	0.03	0.04	0.04	0.9	10	1	6670.7	0.29318
50	0.01	0.01	1	-1	0.03	0.04	0.2	0.9	10	1	6958.3	0.35227
50	0.01	0.01	1	-1	0.03	0.04	0.8	0.9	10	1	7461.9	0.47736
50	0.01	0.01	1	-1	0.03	0.04	1.2	0.9	10	1	7487.6	0.51236
50	0.01	0.01	1	-1	0.03	0.04	1.6	0.9	10	1	7550.8	0.54055
50	0.01	0.01	1	-1	0.03	0.04	2	0.9	10	1	7457.1	0.55327
50	0.1	0.01	1	-1	0.03	0.04	0.04	0.9	10	1	2107.8	0.99973
50	0.1	0.01	1	-1	0.03	0.04	0.2	0.9	10	1	2351.9	0.99945
50	0.1	0.01	1	-1	0.03	0.04	0.8	0.9	10	1	2937.6	0.99682
50	0.1	0.01	1	-1	0.03	0.04	1.2	0.9	10	1	3208	0.99582
50	0.1	0.01	1	-1	0.03	0.04	1.6	0.9	10	1	3396.1	0.99345
50	0.1	0.01	1	-1	0.03	0.04	2	0.9	10	1	3561.9	0.98973
50	0.2	0.01	1	-1	0.03	0.04	0.04	0.9	10	1	1522.9	1
50	0.2	0.01	1	-1	0.03	0.04	0.2	0.9	10	1	1710.8	1
50	0.2	0.01	1	-1	0.03	0.04	0.8	0.9	10	1	2230.2	0.99982
50	0.2	0.01	1	-1	0.03	0.04	1.2	0.9	10	1	2468	0.99955
50	0.2	0.01	1	-1	0.03	0.04	1.6	0.9	10	1	2655.9	0.99927
50	0.2	0.01	1	-1	0.03	0.04	2	0.9	10	1	2817.9	0.99845
50	0.3	0.01	1	-1	0.03	0.04	0.04	0.9	10	1	1306.9	1
50	0.3	0.01	1	-1	0.03	0.04	0.2	0.9	10	1	1487.9	1
50	0.3	0.01	1	-1	0.03	0.04	0.8	0.9	10	1	1992.3	0.99973
50	0.3	0.01	1	-1	0.03	0.04	1.2	0.9	10	1	2292.9	0.99973
50	0.3	0.01	1	-1	0.03	0.04	1.6	0.9	10	1	2480.2	0.99945
50	0.3	0.01	1	-1	0.03	0.04	2	0.9	10	1	2674.2	0.99927
50	0.4	0.01	1	-1	0.03	0.04	0.04	0.9	10	1	1209.8	1
50	0.4	0.01	1	-1	0.03	0.04	0.2	0.9	10	1	1359	1
50	0.4	0.01	1	-1	0.03	0.04	0.8	0.9	10	1	1917.9	1
50	0.4	0.01	1	-1	0.03	0.04	1.2	0.9	10	1	2247.4	1
50	0.4	0.01	1	-1	0.03	0.04	1.6	0.9	10	1	2498.8	0.99964
50	0.4	0.01	1	-1	0.03	0.04	2	0.9	10	1	2739.7	0.99936
50	0.5	0.01	1	-1	0.03	0.04	0.04	0.9	10	1	1112.8	1
50	0.5	0.01	1	-1	0.03	0.04	0.2	0.9	10	1	1308.1	1
50	0.5	0.01	1	-1	0.03	0.04	0.8	0.9	10	1	1903.5	1
50	0.5	0.01	1	-1	0.03	0.04	1.2	0.9	10	1	2240.4	0.99991
50	0.5	0.01	1	-1	0.03	0.04	1.6	0.9	10	1	2581.3	1
50	0.5	0.01	1	-1	0.03	0.04	2	0.9	10	1	2870.9	0.99964
50	0.6	0.01	1	-1	0.03	0.04	0.04	0.9	10	1	1056.7	1
50	0.6	0.01	1	-1	0.03	0.04	0.2	0.9	10	1	1234	1
50	0.6	0.01	1	-1	0.03	0.04	0.8	0.9	10	1	1876	1
50	0.6	0.01	1	-1	0.03	0.04	1.2	0.9	10	1	2318.8	1
50	0.6	0.01	1	-1	0.03	0.04	1.6	0.9	10	1	2732.9	1
50	0.6	0.01	1	-1	0.03	0.04	2	0.9	10	1	3079.9	0.99973
50	0.7	0.01	1	-1	0.03	0.04	0.04	0.9	10	1	981.85	1
50	0.7	0.01	1	-1	0.03	0.04	0.2	0.9	10	1	1166.1	1
50	0.7	0.01	1	-1	0.03	0.04	0.8	0.9	10	1	1900.8	1
50	0.7	0.01	1	-1	0.03	0.04	1.2	0.9	10	1	2392.2	1
50	0.7	0.01	1	-1	0.03	0.04	1.6	0.9	10	1	2840.8	0.99964
50	0.7	0.01	1	-1	0.03	0.04	2	0.9	10	1	3332.4	0.99973
50	0.8	0.01	1	-1	0.03	0.04	0.04	0.9	10	1	918.74	1
50	0.8	0.01	1	-1	0.03	0.04	0.2	0.9	10	1	1104.3	1
50	0.8	0.01	1	-1	0.03	0.04	0.8	0.9	10	1	1846.8	1
50	0.8	0.01	1	-1	0.03	0.04	1.2	0.9	10	1	2394.6	0.99991
50	0.8	0.01	1	-1	0.03	0.04	1.6	0.9	10	1	2997.3	0.99991
50	0.8	0.01	1	-1	0.03	0.04	2	0.9	10	1	3643	0.99964
50	0.9	0.01	1	-1	0.03	0.04	0.04	0.9	10	1	835.74	1
50	0.9	0.01	1	-1	0.03	0.04	0.2	0.9	10	1	1006.9	1
50	0.9	0.01	1	-1	0.03	0.04	0.8	0.9	10	1	1753.4	1
50	0.9	0.01	1	-1	0.03	0.04	1.2	0.9	10	1	2398.5	1
50	0.9	0.01	1	-1	0.03	0.04	1.6	0.9	10	1	3147.4	0.99991
50	0.9	0.01	1	-1	0.03	0.04	2	0.9	10	1	3921.8	0.99918
50	0.99	0.01	1	-1	0.03	0.04	0.04	0.9	10	1	585.33	1
50	0.99	0.01	1	-1	0.03	0.04	0.2	0.9	10	1	701.55	1
50	0.99	0.01	1	-1	0.03	0.04	0.8	0.9	10	1	1343.6	1
50	0.99	0.01	1	-1	0.03	0.04	1.2	0.9	10	1	2073.5	1
50	0.99	0.01	1	-1	0.03	0.04	1.6	0.9	10	1	3305.5	0.99982
50	0.99	0.01	1	-1	0.03	0.04	2	0.9	10	1	5341.9	0.99609
50	0.01	0.1	1	-1	0.03	0.04	0.04	0.1	10	1	8234.8	0.21455
50	0.01	0.1	1	-1	0.03	0.04	0.2	0.1	10	1	8410.4	0.26036
50	0.01	0.1	1	-1	0.03	0.04	0.8	0.1	10	1	8770.6	0.38627
50	0.01	0.1	1	-1	0.03	0.04	1.2	0.1	10	1	9124.2	0.471
50	0.01	0.1	1	-1	0.03	0.04	1.6	0.1	10	1	9019.6	0.53164
50	0.01	0.1	1	-1	0.03	0.04	2	0.1	10	1	9146.5	0.58382
50	0.1	0.1	1	-1	0.03	0.04	0.04	0.1	10	1	8840.1	0.34091
50	0.1	0.1	1	-1	0.03	0.04	0.2	0.1	10	1	9312.9	0.46255
50	0.1	0.1	1	-1	0.03	0.04	0.8	0.1	10	1	8369.1	0.77991
50	0.1	0.1	1	-1	0.03	0.04	1.2	0.1	10	1	7407.3	0.87364
50	0.1	0.1	1	-1	0.03	0.04	1.6	0.1	10	1	6650.7	0.91155
50	0.1	0.1	1	-1	0.03	0.04	2	0.1	10	1	6095.7	0.93618
50	0.2	0.1	1	-1	0.03	0.04	0.04	0.1	10	1	9662.6	0.39609
50	0.2	0.1	1	-1	0.03	0.04	0.2	0.1	10	1	9844.6	0.52955
50	0.2	0.1	1	-1	0.03	0.04	0.8	0.1	10	1	7961.5	0.85555
50	0.2	0.1	1	-1	0.03	0.04	1.2	0.1	10	1	6940.3	0.91673
50	0.2	0.1	1	-1	0.03	0.04	1.6	0.1	10	1	6025.9	0.94991
50	0.2	0.1	1	-1	0.03	0.04	2	0.1	10	1	5426.4	0.96191
50	0.3	0.1	1	-1	0.03	0.04	0.04	0.1	10	1	10161	0.41991
50	0.3	0.1	1	-1	0.03	0.04	0.2	0.1	10	1	10497	0.56009
50	0.3	0.1	1	-1	0.03	0.04	0.8	0.1	10	1	8395.8	0.85873
50	0.3	0.1	1	-1	0.03	0.04	1.2	0.1	10	1	7149.8	0.92682
50	0.3	0.1	1	-1	0.03	0.04	1.6	0.1	10	1	6259.8	0.95609
50	0.3	0.1	1	-1	0.03	0.04	2	0.1	10	1	5806.4	0.97118
50	0.4	0.1	1	-1	0.03	0.04	0.04	0.1	10	1	11056	0.44936
50	0.4	0.1	1	-1	0.03	0.04	0.2	0.1	10	1	10866	0.58373
50	0.4	0.1	1	-1	0.03	0.04	0.8	0.1	10	1	8962.2	0.8595
50	0.4	0.1	1	-1	0.03	0.04	1.2	0.1	10	1	7790.9	0.92318
50	0.4	0.1	1	-1	0.03	0.04	1.6	0.1	10	1	6923.1	0.94873
50	0.4	0.1	1	-1	0.03	0.04	2	0.1	10	1	6398.7	0.96773
50	0.5	0.1	1	-1	0.03	0.04	0.04	0.1	10	1	11788	0.47091
50	0.5	0.1	1	-1	0.03	0.04	0.2	0.1	10	1	11757	0.58227
50	0.5	0.1	1	-1	0.03	0.04	0.8	0.1	10	1	10049	0.84336
50	0.5	0.1	1	-1	0.03	0.04	1.2	0.1	10	1	8923.7	0.89864
50	0.5	0.1	1	-1	0.03	0.04	1.6	0.1	10	1	7969.5	0.93409
50	0.5	0.1	1	-1	0.03	0.04	2	0.1	10	1	7361.1	0.95355
50	0.6	0.1	1	-1	0.03	0.04	0.04	0.1	10	1	12379	0.47627
50	0.6	0.1	1	-1	0.03	0.04	0.2	0.1	10	1	12303	0.58809
50	0.6	0.1	1	-1	0.03	0.04	0.8	0.1	10	1	11101	0.801
50	0.6	0.1	1	-1	0.03	0.04	1.2	0.1	10	1	10272	0.87345
50	0.6	0.1	1	-1	0.03	0.04	1.6	0.1	10	1	9423.2	0.90573
50	0.6	0.1	1	-1	0.03	0.04	2	0.1	10	1	8748.3	0.927
50	0.7	0.1	1	-1	0.03	0.04	0.04	0.1	10	1	13354	0.49145
50	0.7	0.1	1	-1	0.03	0.04	0.2	0.1	10	1	13291	0.56564
50	0.7	0.1	1	-1	0.03	0.04	0.8	0.1	10	1	12703	0.73491
50	0.7	0.1	1	-1	0.03	0.04	1.2	0.1	10	1	12127	0.80755
50	0.7	0.1	1	-1	0.03	0.04	1.6	0.1	10	1	11497	0.84282
50	0.7	0.1	1	-1	0.03	0.04	2	0.1	10	1	10982	0.87209
50	0.8	0.1	1	-1	0.03	0.04	0.04	0.1	10	1	13570	0.51555
50	0.8	0.1	1	-1	0.03	0.04	0.2	0.1	10	1	13641	0.54
50	0.8	0.1	1	-1	0.03	0.04	0.8	0.1	10	1	14282	0.63536
50	0.8	0.1	1	-1	0.03	0.04	1.2	0.1	10	1	13933	0.67036
50	0.8	0.1	1	-1	0.03	0.04	1.6	0.1	10	1	13901	0.70818
50	0.8	0.1	1	-1	0.03	0.04	2	0.1	10	1	13823	0.7292
50	0.9	0.1	1	-1	0.03	0.04	0.04	0.1	10	1	13934	0.52782
50	0.9	0.1	1	-1	0.03	0.04	0.2	0.1	10	1	14126	0.49255
50	0.9	0.1	1	-1	0.03	0.04	0.8	0.1	10	1	13873	0.42109
50	0.9	0.1	1	-1	0.03	0.04	1.2	0.1	10	1	13701	0.38482
50	0.9	0.1	1	-1	0.03	0.04	1.6	0.1	10	1	13446	0.34764
50	0.9	0.1	1	-1	0.03	0.04	2	0.1	10	1	13370	0.33264
50	0.99	0.1	1	-1	0.03	0.04	0.04	0.1	10	1	14712	0.53336
50	0.99	0.1	1	-1	0.03	0.04	0.2	0.1	10	1	13595	0.31345
50	0.99	0.1	1	-1	0.03	0.04	0.8	0.1	10	1	5915.4	0.023727
50	0.99	0.1	1	-1	0.03	0.04	1.2	0.1	10	1	3720.3	0.004
50	0.99	0.1	1	-1	0.03	0.04	1.6	0.1	10	1	2625.5	0.00081818
50	0.99	0.1	1	-1	0.03	0.04	2	0.1	10	1	2026.6	0
50	0.01	0.1	1	-1	0.03	0.04	0.04	0.5	10	1	4449.7	0.022818
50	0.01	0.1	1	-1	0.03	0.04	0.2	0.5	10	1	4852.7	0.040727
50	0.01	0.1	1	-1	0.03	0.04	0.8	0.5	10	1	6557	0.13609
50	0.01	0.1	1	-1	0.03	0.04	1.2	0.5	10	1	7518	0.23564
50	0.01	0.1	1	-1	0.03	0.04	1.6	0.5	10	1	7983.2	0.32318
50	0.01	0.1	1	-1	0.03	0.04	2	0.5	10	1	8163.5	0.39209
50	0.1	0.1	1	-1	0.03	0.04	0.04	0.5	10	1	9071.9	0.64309
50	0.1	0.1	1	-1	0.03	0.04	0.2	0.5	10	1	8534.1	0.76027
50	0.1	0.1	1	-1	0.03	0.04	0.8	0.5	10	1	6507.6	0.92082
50	0.1	0.1	1	-1	0.03	0.04	1.2	0.5	10	1	5679.9	0.951
50	0.1	0.1	1	-1	0.03	0.04	1.6	0.5	10	1	5225	0.96536
50	0.1	0.1	1	-1	0.03	0.04	2	0.5	10	1	4888.2	0.973
50	0.2	0.1	1	-1	0.03	0.04	0.04	0.5	10	1	7639.6	0.87418
50	0.2	0.1	1	-1	0.03	0.04	0.2	0.5	10	1	6720.7	0.92427
50	0.2	0.1	1	-1	0.03	0.04	0.8	0.5	10	1	5098.8	0.97491
50	0.2	0.1	1	-1	0.03	0.04	1.2	0.5	10	1	4607.6	0.98491
50	0.2	0.1	1	-1	0.03	0.04	1.6	0.5	10	1	4260.5	0.99055
50	0.2	0.1	1	-1	0.03	0.04	2	0.5	10	1	4037.3	0.99264
50	0.3	0.1	1	-1	0.03	0.04	0.04	0.5	10	1	6524	0.94336
50	0.3	0.1	1	-1	0.03	0.04	0.2	0.5	10	1	5865.3	0.96382
50	0.3	0.1	1	-1	0.03	0.04	0.8	0.5	10	1	4687.5	0.98536
50	0.3	0.1	1	-1	0.03	0.04	1.2	0.5	10	1	4359.2	0.99018
50	0.3	0.1	1	-1	0.03	0.04	1.6	0.5	10	1	4147.9	0.99236
50	0.3	0.1	1	-1	0.03	0.04	2	0.5	10	1	3965	0.99482
50	0.4	0.1	1	-1	0.03	0.04	0.04	0.5	10	1	5795.2	0.96864
50	0.4	0.1	1	-1	0.03	0.04	0.2	0.5	10	1	5474.9	0.97782
50	0.4	0.1	1	-1	0.03	0.04	0.8	0.5	10	1	4690.3	0.99045
50	0.4	0.1	1	-1	0.03	0.04	1.2	0.5	10	1	4468.9	0.992
50	0.4	0.1	1	-1	0.03	0.04	1.6	0.5	10	1	4321.8	0.99509
50	0.4	0.1	1	-1	0.03	0.04	2	0.5	10	1	4211.5	0.99518
50	0.5	0.1	1	-1	0.03	0.04	0.04	0.5	10	1	5321.4	0.98355
50	0.5	0.1	1	-1	0.03	0.04	0.2	0.5	10	1	5120.9	0.98609
50	0.5	0.1	1	-1	0.03	0.04	0.8	0.5	10	1	4782	0.99064
50	0.5	0.1	1	-1	0.03	0.04	1.2	0.5	10	1	4722.8	0.99273
50	0.5	0.1	1	-1	0.03	0.04	1.6	0.5	10	1	4640.1	0.99382
50	0.5	0.1	1	-1	0.03	0.04	2	0.5	10	1	4573.3	0.99564
50	0.6	0.1	1	-1	0.03	0.04	0.04	0.5	10	1	5027.6	0.98955
50	0.6	0.1	1	-1	0.03	0.04	0.2	0.5	10	1	5055.2	0.99155
50	0.6	0.1	1	-1	0.03	0.04	0.8	0.5	10	1	5082.5	0.99318
50	0.6	0.1	1	-1	0.03	0.04	1.2	0.5	10	1	5095.6	0.99209
50	0.6	0.1	1	-1	0.03	0.04	1.6	0.5	10	1	5090.7	0.99182
50	0.6	0.1	1	-1	0.03	0.04	2	0.5	10	1	5173.9	0.991
50	0.7	0.1	1	-1	0.03	0.04	0.04	0.5	10	1	4749.4	0.99345
50	0.7	0.1	1	-1	0.03	0.04	0.2	0.5	10	1	4940.1	0.99427
50	0.7	0.1	1	-1	0.03	0.04	0.8	0.5	10	1	5407.6	0.99209
50	0.7	0.1	1	-1	0.03	0.04	1.2	0.5	10	1	5721.8	0.99118
50	0.7	0.1	1	-1	0.03	0.04	1.6	0.5	10	1	5948.6	0.99055
50	0.7	0.1	1	-1	0.03	0.04	2	0.5	10	1	6039.8	0.98982
50	0.8	0.1	1	-1	0.03	0.04	0.04	0.5	10	1	4400.8	0.99564
50	0.8	0.1	1	-1	0.03	0.04	0.2	0.5	10	1	4781.4	0.99491
50	0.8	0.1	1	-1	0.03	0.04	0.8	0.5	10	1	5943.8	0.98945
50	0.8	0.1	1	-1	0.03	0.04	1.2	0.5	10	1	6625.7	0.98555
50	0.8	0.1	1	-1	0.03	0.04	1.6	0.5	10	1	7063.5	0.98
50	0.8	0.1	1	-1	0.03	0.04	2	0.5	10	1	7557.9	0.977
50	0.9	0.1	1	-1	0.03	0.04	0.04	0.5	10	1	4065.7	0.99782
50	0.9	0.1	1	-1	0.03	0.04	0.2	0.5	10	1	4626.9	0.99636
50	0.9	0.1	1	-1	0.03	0.04	0.8	0.5	10	1	6695.9	0.98118
50	0.9	0.1	1	-1	0.03	0.04	1.2	0.5	10	1	8063.6	0.96391
50	0.9	0.1	1	-1	0.03	0.04	1.6	0.5	10	1	9440.7	0.94191
50	0.9	0.1	1	-1	0.03	0.04	2	0.5	10	1	10385	0.91055
50	0.99	0.1	1	-1	0.03	0.04	0.04	0.5	10	1	3353.6	0.99927
50	0.99	0.1	1	-1	0.03	0.04	0.2	0.5	10	1	4417.6	0.99582
50	0.99	0.1	1	-1	0.03	0.04	0.8	0.5	10	1	11506	0.80427
50	0.99	0.1	1	-1	0.03	0.04	1.2	0.5	10	1	11956	0.31591
50	0.99	0.1	1	-1	0.03	0.04	1.6	0.5	10	1	6896.1	0.06
50	0.99	0.1	1	-1	0.03	0.04	2	0.5	10	1	3936.8	0.0096364
50	0.01	0.1	1	-1	0.03	0.04	0.04	0.9	10	1	817.53	0
50	0.01	0.1	1	-1	0.03	0.04	0.2	0.9	10	1	942.06	0
50	0.01	0.1	1	-1	0.03	0.04	0.8	0.9	10	1	1763.7	0.005
50	0.01	0.1	1	-1	0.03	0.04	1.2	0.9	10	1	2700.9	0.025091
50	0.01	0.1	1	-1	0.03	0.04	1.6	0.9	10	1	3791.8	0.075727
50	0.01	0.1	1	-1	0.03	0.04	2	0.9	10	1	4768.9	0.14255
50	0.1	0.1	1	-1	0.03	0.04	0.04	0.9	10	1	5797.3	0.93855
50	0.1	0.1	1	-1	0.03	0.04	0.2	0.9	10	1	5354.2	0.954
50	0.1	0.1	1	-1	0.03	0.04	0.8	0.9	10	1	4408.8	0.97427
50	0.1	0.1	1	-1	0.03	0.04	1.2	0.9	10	1	4149.5	0.97964
50	0.1	0.1	1	-1	0.03	0.04	1.6	0.9	10	1	4069.5	0.98318
50	0.1	0.1	1	-1	0.03	0.04	2	0.9	10	1	3924.2	0.98309
50	0.2	0.1	1	-1	0.03	0.04	0.04	0.9	10	1	3105.2	0.99855
50	0.2	0.1	1	-1	0.03	0.04	0.2	0.9	10	1	3100.1	0.99745
50	0.2	0.1	1	-1	0.03	0.04	0.8	0.9	10	1	3030.7	0.99791
50	0.2	0.1	1	-1	0.03	0.04	1.2	0.9	10	1	3013.4	0.99845
50	0.2	0.1	1	-1	0.03	0.04	1.6	0.9	10	1	3047.4	0.99791
50	0.2	0.1	1	-1	0.03	0.04	2	0.9	10	1	3002.3	0.99736
50	0.3	0.1	1	-1	0.03	0.04	0.04	0.9	10	1	2383	0.99991
50	0.3	0.1	1	-1	0.03	0.04	0.2	0.9	10	1	2449.9	0.99991
50	0.3	0.1	1	-1	0.03	0.04	0.8	0.9	10	1	2643.9	0.99982
50	0.3	0.1	1	-1	0.03	0.04	1.2	0.9	10	1	2728.1	0.99973
50	0.3	0.1	1	-1	0.03	0.04	1.6	0.9	10	1	2789.8	0.99955
50	0.3	0.1	1	-1	0.03	0.04	2	0.9	10	1	2825.5	0.99882
50	0.4	0.1	1	-1	0.03	0.04	0.04	0.9	10	1	2037.7	1
50	0.4	0.1	1	-1	0.03	0.04	0.2	0.9	10	1	2148.3	0.99991
50	0.4	0.1	1	-1	0.03	0.04	0.8	0.9	10	1	2490	0.99991
50	0.4	0.1	1	-1	0.03	0.04	1.2	0.9	10	1	2661.7	0.99973
50	0.4	0.1	1	-1	0.03	0.04	1.6	0.9	10	1	2756.5	0.99945
50	0.4	0.1	1	-1	0.03	0.04	2	0.9	10	1	2858.4	0.99991
50	0.5	0.1	1	-1	0.03	0.04	0.04	0.9	10	1	1852.8	1
50	0.5	0.1	1	-1	0.03	0.04	0.2	0.9	10	1	2005.1	1
50	0.5	0.1	1	-1	0.03	0.04	0.8	0.9	10	1	2452.4	1
50	0.5	0.1	1	-1	0.03	0.04	1.2	0.9	10	1	2662.7	0.99982
50	0.5	0.1	1	-1	0.03	0.04	1.6	0.9	10	1	2818.9	0.9997
50	0.5	0.1	1	-1	0.03	0.04	2	0.9	10	1	2998.4	0.99964
50	0.6	0.1	1	-1	0.03	0.04	0.04	0.9	10	1	1716.3	1
50	0.6	0.1	1	-1	0.03	0.04	0.2	0.9	10	1	1874.8	1
50	0.6	0.1	1	-1	0.03	0.04	0.8	0.9	10	1	2450.2	0.99991
50	0.6	0.1	1	-1	0.03	0.04	1.2	0.9	10	1	2749.6	1
50	0.6	0.1	1	-1	0.03	0.04	1.6	0.9	10	1	3005.2	0.99955
50	0.6	0.1	1	-1	0.03	0.04	2	0.9	10	1	3246.8	0.99955
50	0.7	0.1	1	-1	0.03	0.04	0.04	0.9	10	1	1618.3	1
50	0.7	0.1	1	-1	0.03	0.04	0.2	0.9	10	1	1780.2	1
50	0.7	0.1	1	-1	0.03	0.04	0.8	0.9	10	1	2464.7	1
50	0.7	0.1	1	-1	0.03	0.04	1.2	0.9	10	1	2843.4	0.99991
50	0.7	0.1	1	-1	0.03	0.04	1.6	0.9	10	1	3211.4	0.99982
50	0.7	0.1	1	-1	0.03	0.04	2	0.9	10	1	3563.7	0.99927
50	0.8	0.1	1	-1	0.03	0.04	0.04	0.9	10	1	1497.1	1
50	0.8	0.1	1	-1	0.03	0.04	0.2	0.9	10	1	1727.7	1
50	0.8	0.1	1	-1	0.03	0.04	0.8	0.9	10	1	2519.9	1
50	0.8	0.1	1	-1	0.03	0.04	1.2	0.9	10	1	3026.8	0.99982
50	0.8	0.1	1	-1	0.03	0.04	1.6	0.9	10	1	3488.1	0.99973
50	0.8	0.1	1	-1	0.03	0.04	2	0.9	10	1	4005.6	0.99936
50	0.9	0.1	1	-1	0.03	0.04	0.04	0.9	10	1	1393.4	1
50	0.9	0.1	1	-1	0.03	0.04	0.2	0.9	10	1	1611.8	1
50	0.9	0.1	1	-1	0.03	0.04	0.8	0.9	10	1	2581.5	1
50	0.9	0.1	1	-1	0.03	0.04	1.2	0.9	10	1	3270.3	0.99991
50	0.9	0.1	1	-1	0.03	0.04	1.6	0.9	10	1	4020.5	0.99882
50	0.9	0.1	1	-1	0.03	0.04	2	0.9	10	1	4827	0.99845
50	0.99	0.1	1	-1	0.03	0.04	0.04	0.9	10	1	1187.1	1
50	0.99	0.1	1	-1	0.03	0.04	0.2	0.9	10	1	1457.3	1
50	0.99	0.1	1	-1	0.03	0.04	0.8	0.9	10	1	3109.2	0.99991
50	0.99	0.1	1	-1	0.03	0.04	1.2	0.9	10	1	5325	0.99391
50	0.99	0.1	1	-1	0.03	0.04	1.6	0.9	10	1	9216.9	0.92836
50	0.99	0.1	1	-1	0.03	0.04	2	0.9	10	1	12465	0.61136
50	0.01	0.2	1	-1	0.03	0.04	0.04	0.1	10	1	7756.9	0.17555
50	0.01	0.2	1	-1	0.03	0.04	0.2	0.1	10	1	7979.2	0.21373
50	0.01	0.2	1	-1	0.03	0.04	0.8	0.1	10	1	8607.5	0.32818
50	0.01	0.2	1	-1	0.03	0.04	1.2	0.1	10	1	8818.1	0.40373
50	0.01	0.2	1	-1	0.03	0.04	1.6	0.1	10	1	8933.4	0.45609
50	0.01	0.2	1	-1	0.03	0.04	2	0.1	10	1	8790.3	0.50391
50	0.1	0.2	1	-1	0.03	0.04	0.04	0.1	10	1	9242.2	0.302
50	0.1	0.2	1	-1	0.03	0.04	0.2	0.1	10	1	9727.5	0.41736
50	0.1	0.2	1	-1	0.03	0.04	0.8	0.1	10	1	8737.3	0.77336
50	0.1	0.2	1	-1	0.03	0.04	1.2	0.1	10	1	7595	0.87009
50	0.1	0.2	1	-1	0.03	0.04	1.6	0.1	10	1	6768.4	0.91264
50	0.1	0.2	1	-1	0.03	0.04	2	0.1	10	1	6080.4	0.94373
50	0.2	0.2	1	-1	0.03	0.04	0.04	0.1	10	1	10184	0.35936
50	0.2	0.2	1	-1	0.03	0.04	0.2	0.1	10	1	10539	0.51109
50	0.2	0.2	1	-1	0.03	0.04	0.8	0.1	10	1	8408.2	0.85818
50	0.2	0.2	1	-1	0.03	0.04	1.2	0.1	10	1	7068.9	0.92636
50	0.2	0.2	1	-1	0.03	0.04	1.6	0.1	10	1	6163.3	0.95855
50	0.2	0.2	1	-1	0.03	0.04	2	0.1	10	1	5543.4	0.97091
50	0.3	0.2	1	-1	0.03	0.04	0.04	0.1	10	1	10888	0.38845
50	0.3	0.2	1	-1	0.03	0.04	0.2	0.1	10	1	11479	0.54945
50	0.3	0.2	1	-1	0.03	0.04	0.8	0.1	10	1	8705.4	0.875
50	0.3	0.2	1	-1	0.03	0.04	1.2	0.1	10	1	7321.4	0.94091
50	0.3	0.2	1	-1	0.03	0.04	1.6	0.1	10	1	6384.5	0.96536
50	0.3	0.2	1	-1	0.03	0.04	2	0.1	10	1	5645.8	0.97845
50	0.4	0.2	1	-1	0.03	0.04	0.04	0.1	10	1	11889	0.41055
50	0.4	0.2	1	-1	0.03	0.04	0.2	0.1	10	1	11990	0.56527
50	0.4	0.2	1	-1	0.03	0.04	0.8	0.1	10	1	9422.3	0.88064
50	0.4	0.2	1	-1	0.03	0.04	1.2	0.1	10	1	7858.4	0.942
50	0.4	0.2	1	-1	0.03	0.04	1.6	0.1	10	1	6937.7	0.96018
50	0.4	0.2	1	-1	0.03	0.04	2	0.1	10	1	6262.8	0.977
50	0.5	0.2	1	-1	0.03	0.04	0.04	0.1	10	1	12738	0.44145
50	0.5	0.2	1	-1	0.03	0.04	0.2	0.1	10	1	12903	0.57418
50	0.5	0.2	1	-1	0.03	0.04	0.8	0.1	10	1	10321	0.86236
50	0.5	0.2	1	-1	0.03	0.04	1.2	0.1	10	1	8922.6	0.93091
50	0.5	0.2	1	-1	0.03	0.04	1.6	0.1	10	1	7874.1	0.95509
50	0.5	0.2	1	-1	0.03	0.04	2	0.1	10	1	7228	0.97127
50	0.6	0.2	1	-1	0.03	0.04	0.04	0.1	10	1	13539	0.45664
50	0.6	0.2	1	-1	0.03	0.04	0.2	0.1	10	1	13776	0.5709
50	0.6	0.2	1	-1	0.03	0.04	0.8	0.1	10	1	11661	0.83891
50	0.6	0.2	1	-1	0.03	0.04	1.2	0.1	10	1	10071	0.89973
50	0.6	0.2	1	-1	0.03	0.04	1.6	0.1	10	1	9241.4	0.93755
50	0.6	0.2	1	-1	0.03	0.04	2	0.1	10	1	8493.4	0.95291
50	0.7	0.2	1	-1	0.03	0.04	0.04	0.1	10	1	14396	0.46991
50	0.7	0.2	1	-1	0.03	0.04	0.2	0.1	10	1	14775	0.55909
50	0.7	0.2	1	-1	0.03	0.04	0.8	0.1	10	1	13297	0.78282
50	0.7	0.2	1	-1	0.03	0.04	1.2	0.1	10	1	12240	0.85382
50	0.7	0.2	1	-1	0.03	0.04	1.6	0.1	10	1	11259	0.89973
50	0.7	0.2	1	-1	0.03	0.04	2	0.1	10	1	10445	0.91991
50	0.8	0.2	1	-1	0.03	0.04	0.04	0.1	10	1	15379	0.48518
50	0.8	0.2	1	-1	0.03	0.04	0.2	0.1	10	1	15302	0.54555
50	0.8	0.2	1	-1	0.03	0.04	0.8	0.1	10	1	15072	0.69491
50	0.8	0.2	1	-1	0.03	0.04	1.2	0.1	10	1	14362	0.75745
50	0.8	0.2	1	-1	0.03	0.04	1.6	0.1	10	1	14241	0.80064
50	0.8	0.2	1	-1	0.03	0.04	2	0.1	10	1	13559	0.81945
50	0.9	0.2	1	-1	0.03	0.04	0.04	0.1	10	1	15866	0.49318
50	0.9	0.2	1	-1	0.03	0.04	0.2	0.1	10	1	16082	0.49036
50	0.9	0.2	1	-1	0.03	0.04	0.8	0.1	10	1	16113	0.49073
50	0.9	0.2	1	-1	0.03	0.04	1.2	0.1	10	1	15921	0.47918
50	0.9	0.2	1	-1	0.03	0.04	1.6	0.1	10	1	15673	0.48236
50	0.9	0.2	1	-1	0.03	0.04	2	0.1	10	1	15517	0.46382
50	0.99	0.2	1	-1	0.03	0.04	0.04	0.1	10	1	16104	0.49136
50	0.99	0.2	1	-1	0.03	0.04	0.2	0.1	10	1	14900	0.28927
50	0.99	0.2	1	-1	0.03	0.04	0.8	0.1	10	1	6747.2	0.026273
50	0.99	0.2	1	-1	0.03	0.04	1.2	0.1	10	1	4293.8	0.0047273
50	0.99	0.2	1	-1	0.03	0.04	1.6	0.1	10	1	3056.5	0.00063636
50	0.99	0.2	1	-1	0.03	0.04	2	0.1	10	1	2357.3	9.09E-05
50	0.01	0.2	1	-1	0.03	0.04	0.04	0.5	10	1	3066.1	0.0051818
50	0.01	0.2	1	-1	0.03	0.04	0.2	0.5	10	1	3330.2	0.0080909
50	0.01	0.2	1	-1	0.03	0.04	0.8	0.5	10	1	4476.4	0.05
50	0.01	0.2	1	-1	0.03	0.04	1.2	0.5	10	1	5411.9	0.088545
50	0.01	0.2	1	-1	0.03	0.04	1.6	0.5	10	1	6050	0.13973
50	0.01	0.2	1	-1	0.03	0.04	2	0.5	10	1	6752.9	0.20218
50	0.1	0.2	1	-1	0.03	0.04	0.04	0.5	10	1	9370.6	0.37236
50	0.1	0.2	1	-1	0.03	0.04	0.2	0.5	10	1	9557.5	0.536
50	0.1	0.2	1	-1	0.03	0.04	0.8	0.5	10	1	7761.1	0.858
50	0.1	0.2	1	-1	0.03	0.04	1.2	0.5	10	1	6550.7	0.92382
50	0.1	0.2	1	-1	0.03	0.04	1.6	0.5	10	1	5953.3	0.94473
50	0.1	0.2	1	-1	0.03	0.04	2	0.5	10	1	5437.3	0.96036
50	0.2	0.2	1	-1	0.03	0.04	0.04	0.5	10	1	9940.5	0.72573
50	0.2	0.2	1	-1	0.03	0.04	0.2	0.5	10	1	8766.2	0.82991
50	0.2	0.2	1	-1	0.03	0.04	0.8	0.5	10	1	6059.1	0.96118
50	0.2	0.2	1	-1	0.03	0.04	1.2	0.5	10	1	5212.7	0.97664
50	0.2	0.2	1	-1	0.03	0.04	1.6	0.5	10	1	4745.1	0.98736
50	0.2	0.2	1	-1	0.03	0.04	2	0.5	10	1	4337.7	0.98891
50	0.3	0.2	1	-1	0.03	0.04	0.04	0.5	10	1	8918.3	0.874
50	0.3	0.2	1	-1	0.03	0.04	0.2	0.5	10	1	7756	0.92145
50	0.3	0.2	1	-1	0.03	0.04	0.8	0.5	10	1	5553.1	0.97764
50	0.3	0.2	1	-1	0.03	0.04	1.2	0.5	10	1	4854.7	0.988
50	0.3	0.2	1	-1	0.03	0.04	1.6	0.5	10	1	4526.4	0.99173
50	0.3	0.2	1	-1	0.03	0.04	2	0.5	10	1	4235	0.99282
50	0.4	0.2	1	-1	0.03	0.04	0.04	0.5	10	1	7840.7	0.92964
50	0.4	0.2	1	-1	0.03	0.04	0.2	0.5	10	1	7088.9	0.95727
50	0.4	0.2	1	-1	0.03	0.04	0.8	0.5	10	1	5361.4	0.98573
50	0.4	0.2	1	-1	0.03	0.04	1.2	0.5	10	1	4955	0.99155
50	0.4	0.2	1	-1	0.03	0.04	1.6	0.5	10	1	4600	0.994
50	0.4	0.2	1	-1	0.03	0.04	2	0.5	10	1	4402.5	0.99545
50	0.5	0.2	1	-1	0.03	0.04	0.04	0.5	10	1	7255.3	0.95791
50	0.5	0.2	1	-1	0.03	0.04	0.2	0.5	10	1	6637.9	0.97155
50	0.5	0.2	1	-1	0.03	0.04	0.8	0.5	10	1	5548.4	0.98736
50	0.5	0.2	1	-1	0.03	0.04	1.2	0.5	10	1	5161.8	0.99155
50	0.5	0.2	1	-1	0.03	0.04	1.6	0.5	10	1	4945.5	0.99509
50	0.5	0.2	1	-1	0.03	0.04	2	0.5	10	1	4736.3	0.99382
50	0.6	0.2	1	-1	0.03	0.04	0.04	0.5	10	1	6646.2	0.97564
50	0.6	0.2	1	-1	0.03	0.04	0.2	0.5	10	1	6394.1	0.97982
50	0.6	0.2	1	-1	0.03	0.04	0.8	0.5	10	1	5770.8	0.98955
50	0.6	0.2	1	-1	0.03	0.04	1.2	0.5	10	1	5563.8	0.99118
50	0.6	0.2	1	-1	0.03	0.04	1.6	0.5	10	1	5486.1	0.99327
50	0.6	0.2	1	-1	0.03	0.04	2	0.5	10	1	5366.6	0.99273
50	0.7	0.2	1	-1	0.03	0.04	0.04	0.5	10	1	6276.6	0.984
50	0.7	0.2	1	-1	0.03	0.04	0.2	0.5	10	1	6255.5	0.98555
50	0.7	0.2	1	-1	0.03	0.04	0.8	0.5	10	1	6334.9	0.99082
50	0.7	0.2	1	-1	0.03	0.04	1.2	0.5	10	1	6235.5	0.99064
50	0.7	0.2	1	-1	0.03	0.04	1.6	0.5	10	1	6179.2	0.99173
50	0.7	0.2	1	-1	0.03	0.04	2	0.5	10	1	6266	0.99055
50	0.8	0.2	1	-1	0.03	0.04	0.04	0.5	10	1	5800.9	0.98945
50	0.8	0.2	1	-1	0.03	0.04	0.2	0.5	10	1	6059.5	0.98927
50	0.8	0.2	1	-1	0.03	0.04	0.8	0.5	10	1	6837.3	0.98691
50	0.8	0.2	1	-1	0.03	0.04	1.2	0.5	10	1	7238.7	0.98591
50	0.8	0.2	1	-1	0.03	0.04	1.6	0.5	10	1	7447	0.98636
50	0.8	0.2	1	-1	0.03	0.04	2	0.5	10	1	7652.1	0.98091
50	0.9	0.2	1	-1	0.03	0.04	0.04	0.5	10	1	5381.9	0.99364
50	0.9	0.2	1	-1	0.03	0.04	0.2	0.5	10	1	5898.4	0.99127
50	0.9	0.2	1	-1	0.03	0.04	0.8	0.5	10	1	7815.5	0.97791
50	0.9	0.2	1	-1	0.03	0.04	1.2	0.5	10	1	8901.3	0.96473
50	0.9	0.2	1	-1	0.03	0.04	1.6	0.5	10	1	9858.4	0.95373
50	0.9	0.2	1	-1	0.03	0.04	2	0.5	10	1	10679	0.93255
50	0.99	0.2	1	-1	0.03	0.04	0.04	0.5	10	1	4736.6	0.99655
50	0.99	0.2	1	-1	0.03	0.04	0.2	0.5	10	1	6133.2	0.98873
50	0.99	0.2	1	-1	0.03	0.04	0.8	0.5	10	1	14401	0.68745
50	0.99	0.2	1	-1	0.03	0.04	1.2	0.5	10	1	12012	0.22709
50	0.99	0.2	1	-1	0.03	0.04	1.6	0.5	10	1	7087.3	0.047818
50	0.99	0.2	1	-1	0.03	0.04	2	0.5	10	1	4109.3	0.0078182
50	0.01	0.2	1	-1	0.03	0.04	0.04	0.9	10	1	590.38	0
50	0.01	0.2	1	-1	0.03	0.04	0.2	0.9	10	1	637.4	0
50	0.01	0.2	1	-1	0.03	0.04	0.8	0.9	10	1	939.82	0
50	0.01	0.2	1	-1	0.03	0.04	1.2	0.9	10	1	1253.5	0.0016364
50	0.01	0.2	1	-1	0.03	0.04	1.6	0.9	10	1	1661.8	0.0064545
50	0.01	0.2	1	-1	0.03	0.04	2	0.9	10	1	2291.2	0.017545
50	0.1	0.2	1	-1	0.03	0.04	0.04	0.9	10	1	9125.9	0.48436
50	0.1	0.2	1	-1	0.03	0.04	0.2	0.9	10	1	8715.3	0.67782
50	0.1	0.2	1	-1	0.03	0.04	0.8	0.9	10	1	6473.6	0.91036
50	0.1	0.2	1	-1	0.03	0.04	1.2	0.9	10	1	5595	0.93736
50	0.1	0.2	1	-1	0.03	0.04	1.6	0.9	10	1	5088.1	0.955
50	0.1	0.2	1	-1	0.03	0.04	2	0.9	10	1	4751.4	0.96391
50	0.2	0.2	1	-1	0.03	0.04	0.04	0.9	10	1	5621.3	0.96473
50	0.2	0.2	1	-1	0.03	0.04	0.2	0.9	10	1	5112.2	0.97727
50	0.2	0.2	1	-1	0.03	0.04	0.8	0.9	10	1	4100.9	0.99109
50	0.2	0.2	1	-1	0.03	0.04	1.2	0.9	10	1	3803.8	0.99327
50	0.2	0.2	1	-1	0.03	0.04	1.6	0.9	10	1	3630.9	0.99473
50	0.2	0.2	1	-1	0.03	0.04	2	0.9	10	1	3526	0.99509
50	0.3	0.2	1	-1	0.03	0.04	0.04	0.9	10	1	3886	0.99709
50	0.3	0.2	1	-1	0.03	0.04	0.2	0.9	10	1	3718	0.99691
50	0.3	0.2	1	-1	0.03	0.04	0.8	0.9	10	1	3420.2	0.99782
50	0.3	0.2	1	-1	0.03	0.04	1.2	0.9	10	1	3299.8	0.99809
50	0.3	0.2	1	-1	0.03	0.04	1.6	0.9	10	1	3241.7	0.99809
50	0.3	0.2	1	-1	0.03	0.04	2	0.9	10	1	3217	0.99809
50	0.4	0.2	1	-1	0.03	0.04	0.04	0.9	10	1	3056	0.99955
50	0.4	0.2	1	-1	0.03	0.04	0.2	0.9	10	1	3104.9	0.99955
50	0.4	0.2	1	-1	0.03	0.04	0.8	0.9	10	1	3168.8	0.99973
50	0.4	0.2	1	-1	0.03	0.04	1.2	0.9	10	1	3169	0.99936
50	0.4	0.2	1	-1	0.03	0.04	1.6	0.9	10	1	3193.6	0.99918
50	0.4	0.2	1	-1	0.03	0.04	2	0.9	10	1	3246.3	0.999
50	0.5	0.2	1	-1	0.03	0.04	0.04	0.9	10	1	2659.7	1
50	0.5	0.2	1	-1	0.03	0.04	0.2	0.9	10	1	2761.7	0.99991
50	0.5	0.2	1	-1	0.03	0.04	0.8	0.9	10	1	3051.2	0.99982
50	0.5	0.2	1	-1	0.03	0.04	1.2	0.9	10	1	3136.7	0.99964
50	0.5	0.2	1	-1	0.03	0.04	1.6	0.9	10	1	3252	0.99909
50	0.5	0.2	1	-1	0.03	0.04	2	0.9	10	1	3358.3	0.99927
50	0.6	0.2	1	-1	0.03	0.04	0.04	0.9	10	1	2408.5	0.99991
50	0.6	0.2	1	-1	0.03	0.04	0.2	0.9	10	1	2565.8	0.99991
50	0.6	0.2	1	-1	0.03	0.04	0.8	0.9	10	1	3024.1	0.99982
50	0.6	0.2	1	-1	0.03	0.04	1.2	0.9	10	1	3252.6	0.99982
50	0.6	0.2	1	-1	0.03	0.04	1.6	0.9	10	1	3426.7	0.99955
50	0.6	0.2	1	-1	0.03	0.04	2	0.9	10	1	3567.6	0.99964
50	0.7	0.2	1	-1	0.03	0.04	0.04	0.9	10	1	2214.1	1
50	0.7	0.2	1	-1	0.03	0.04	0.2	0.9	10	1	2371.9	1
50	0.7	0.2	1	-1	0.03	0.04	0.8	0.9	10	1	3037.7	0.99991
50	0.7	0.2	1	-1	0.03	0.04	1.2	0.9	10	1	3372.5	0.99973
50	0.7	0.2	1	-1	0.03	0.04	1.6	0.9	10	1	3654.6	0.99955
50	0.7	0.2	1	-1	0.03	0.04	2	0.9	10	1	3876.7	0.99945
50	0.8	0.2	1	-1	0.03	0.04	0.04	0.9	10	1	2060.5	1
50	0.8	0.2	1	-1	0.03	0.04	0.2	0.9	10	1	2276.6	1
50	0.8	0.2	1	-1	0.03	0.04	0.8	0.9	10	1	3078.4	0.99991
50	0.8	0.2	1	-1	0.03	0.04	1.2	0.9	10	1	3567.6	0.99982
50	0.8	0.2	1	-1	0.03	0.04	1.6	0.9	10	1	3968.5	0.99927
50	0.8	0.2	1	-1	0.03	0.04	2	0.9	10	1	4388.7	0.999
50	0.9	0.2	1	-1	0.03	0.04	0.04	0.9	10	1	1886.6	1
50	0.9	0.2	1	-1	0.03	0.04	0.2	0.9	10	1	2155.1	1
50	0.9	0.2	1	-1	0.03	0.04	0.8	0.9	10	1	3171.6	0.99973
50	0.9	0.2	1	-1	0.03	0.04	1.2	0.9	10	1	3924.7	0.99927
50	0.9	0.2	1	-1	0.03	0.04	1.6	0.9	10	1	4641.1	0.99882
50	0.9	0.2	1	-1	0.03	0.04	2	0.9	10	1	5342.4	0.99755
50	0.99	0.2	1	-1	0.03	0.04	0.04	0.9	10	1	1688.1	1
50	0.99	0.2	1	-1	0.03	0.04	0.2	0.9	10	1	2076.9	1
50	0.99	0.2	1	-1	0.03	0.04	0.8	0.9	10	1	4501.3	0.99718
50	0.99	0.2	1	-1	0.03	0.04	1.2	0.9	10	1	7699.3	0.97691
50	0.99	0.2	1	-1	0.03	0.04	1.6	0.9	10	1	12444	0.81464
50	0.99	0.2	1	-1	0.03	0.04	2	0.9	10	1	12736	0.39218
50	0.01	0.3	1	-1	0.03	0.04	0.04	0.1	10	1	7755.3	0.15764
50	0.01	0.3	1	-1	0.03	0.04	0.2	0.1	10	1	8067.5	0.18545
50	0.01	0.3	1	-1	0.03	0.04	0.8	0.1	10	1	8669.6	0.28218
50	0.01	0.3	1	-1	0.03	0.04	1.2	0.1	10	1	8829.4	0.33955
50	0.01	0.3	1	-1	0.03	0.04	1.6	0.1	10	1	8839.5	0.39382
50	0.01	0.3	1	-1	0.03	0.04	2	0.1	10	1	8879.7	0.43673
50	0.1	0.3	1	-1	0.03	0.04	0.04	0.1	10	1	9459.1	0.27691
50	0.1	0.3	1	-1	0.03	0.04	0.2	0.1	10	1	10098	0.39191
50	0.1	0.3	1	-1	0.03	0.04	0.8	0.1	10	1	9433.5	0.76455
50	0.1	0.3	1	-1	0.03	0.04	1.2	0.1	10	1	8035.6	0.86827
50	0.1	0.3	1	-1	0.03	0.04	1.6	0.1	10	1	7183.9	0.91773
50	0.1	0.3	1	-1	0.03	0.04	2	0.1	10	1	6457.9	0.94136
50	0.2	0.3	1	-1	0.03	0.04	0.04	0.1	10	1	10767	0.32382
50	0.2	0.3	1	-1	0.03	0.04	0.2	0.1	10	1	11171	0.48982
50	0.2	0.3	1	-1	0.03	0.04	0.8	0.1	10	1	8880.3	0.86218
50	0.2	0.3	1	-1	0.03	0.04	1.2	0.1	10	1	7278	0.93064
50	0.2	0.3	1	-1	0.03	0.04	1.6	0.1	10	1	6262.2	0.96145
50	0.2	0.3	1	-1	0.03	0.04	2	0.1	10	1	5639.3	0.97591
50	0.3	0.3	1	-1	0.03	0.04	0.04	0.1	10	1	11538	0.36818
50	0.3	0.3	1	-1	0.03	0.04	0.2	0.1	10	1	12171	0.53364
50	0.3	0.3	1	-1	0.03	0.04	0.8	0.1	10	1	9197.8	0.88482
50	0.3	0.3	1	-1	0.03	0.04	1.2	0.1	10	1	7438.9	0.95018
50	0.3	0.3	1	-1	0.03	0.04	1.6	0.1	10	1	6426.4	0.96955
50	0.3	0.3	1	-1	0.03	0.04	2	0.1	10	1	5755.3	0.98145
50	0.4	0.3	1	-1	0.03	0.04	0.04	0.1	10	1	12897	0.39591
50	0.4	0.3	1	-1	0.03	0.04	0.2	0.1	10	1	12706	0.56455
50	0.4	0.3	1	-1	0.03	0.04	0.8	0.1	10	1	9790.8	0.89109
50	0.4	0.3	1	-1	0.03	0.04	1.2	0.1	10	1	7906.8	0.9463
50	0.4	0.3	1	-1	0.03	0.04	1.6	0.1	10	1	6862.8	0.97218
50	0.4	0.3	1	-1	0.03	0.04	2	0.1	10	1	6122.5	0.98145
50	0.5	0.3	1	-1	0.03	0.04	0.04	0.1	10	1	13774	0.41427
50	0.5	0.3	1	-1	0.03	0.04	0.2	0.1	10	1	13990	0.57145
50	0.5	0.3	1	-1	0.03	0.04	0.8	0.1	10	1	10700	0.88264
50	0.5	0.3	1	-1	0.03	0.04	1.2	0.1	10	1	8970.8	0.94273
50	0.5	0.3	1	-1	0.03	0.04	1.6	0.1	10	1	7811.6	0.96618
50	0.5	0.3	1	-1	0.03	0.04	2	0.1	10	1	6917.4	0.97636
50	0.6	0.3	1	-1	0.03	0.04	0.04	0.1	10	1	14663	0.43382
50	0.6	0.3	1	-1	0.03	0.04	0.2	0.1	10	1	14817	0.57609
50	0.6	0.3	1	-1	0.03	0.04	0.8	0.1	10	1	12168	0.86473
50	0.6	0.3	1	-1	0.03	0.04	1.2	0.1	10	1	10235	0.92673
50	0.6	0.3	1	-1	0.03	0.04	1.6	0.1	10	1	9104.2	0.95582
50	0.6	0.3	1	-1	0.03	0.04	2	0.1	10	1	8463.5	0.97182
50	0.7	0.3	1	-1	0.03	0.04	0.04	0.1	10	1	15954	0.46209
50	0.7	0.3	1	-1	0.03	0.04	0.2	0.1	10	1	15977	0.56382
50	0.7	0.3	1	-1	0.03	0.04	0.8	0.1	10	1	13922	0.82591
50	0.7	0.3	1	-1	0.03	0.04	1.2	0.1	10	1	12260	0.892
50	0.7	0.3	1	-1	0.03	0.04	1.6	0.1	10	1	11171	0.92864
50	0.7	0.3	1	-1	0.03	0.04	2	0.1	10	1	10166	0.95118
50	0.8	0.3	1	-1	0.03	0.04	0.04	0.1	10	1	17163	0.47173
50	0.8	0.3	1	-1	0.03	0.04	0.2	0.1	10	1	17168	0.54027
50	0.8	0.3	1	-1	0.03	0.04	0.8	0.1	10	1	16016	0.73855
50	0.8	0.3	1	-1	0.03	0.04	1.2	0.1	10	1	15232	0.80536
50	0.8	0.3	1	-1	0.03	0.04	1.6	0.1	10	1	14331	0.85827
50	0.8	0.3	1	-1	0.03	0.04	2	0.1	10	1	13569	0.88182
50	0.9	0.3	1	-1	0.03	0.04	0.04	0.1	10	1	17976	0.47918
50	0.9	0.3	1	-1	0.03	0.04	0.2	0.1	10	1	17740	0.49727
50	0.9	0.3	1	-1	0.03	0.04	0.8	0.1	10	1	17777	0.55064
50	0.9	0.3	1	-1	0.03	0.04	1.2	0.1	10	1	18066	0.56264
50	0.9	0.3	1	-1	0.03	0.04	1.6	0.1	10	1	17886	0.58591
50	0.9	0.3	1	-1	0.03	0.04	2	0.1	10	1	17836	0.60218
50	0.99	0.3	1	-1	0.03	0.04	0.04	0.1	10	1	18378	0.46364
50	0.99	0.3	1	-1	0.03	0.04	0.2	0.1	10	1	16903	0.28873
50	0.99	0.3	1	-1	0.03	0.04	0.8	0.1	10	1	7954.6	0.029364
50	0.99	0.3	1	-1	0.03	0.04	1.2	0.1	10	1	5109.5	0.0060909
50	0.99	0.3	1	-1	0.03	0.04	1.6	0.1	10	1	3733.8	0.0019091
50	0.99	0.3	1	-1	0.03	0.04	2	0.1	10	1	2862.8	0.00063636
50	0.01	0.3	1	-1	0.03	0.04	0.04	0.5	10	1	2399.9	0.0014545
50	0.01	0.3	1	-1	0.03	0.04	0.2	0.5	10	1	2570.9	0.0027273
50	0.01	0.3	1	-1	0.03	0.04	0.8	0.5	10	1	3343.6	0.014818
50	0.01	0.3	1	-1	0.03	0.04	1.2	0.5	10	1	4090.9	0.032182
50	0.01	0.3	1	-1	0.03	0.04	1.6	0.5	10	1	4658.3	0.063545
50	0.01	0.3	1	-1	0.03	0.04	2	0.5	10	1	5393.1	0.10155
50	0.1	0.3	1	-1	0.03	0.04	0.04	0.5	10	1	8193.4	0.17455
50	0.1	0.3	1	-1	0.03	0.04	0.2	0.5	10	1	9426.5	0.31927
50	0.1	0.3	1	-1	0.03	0.04	0.8	0.5	10	1	9111.6	0.76145
50	0.1	0.3	1	-1	0.03	0.04	1.2	0.5	10	1	7691.3	0.87564
50	0.1	0.3	1	-1	0.03	0.04	1.6	0.5	10	1	6812.1	0.91445
50	0.1	0.3	1	-1	0.03	0.04	2	0.5	10	1	6071	0.94673
50	0.2	0.3	1	-1	0.03	0.04	0.04	0.5	10	1	11411	0.50191
50	0.2	0.3	1	-1	0.03	0.04	0.2	0.5	10	1	10547	0.69236
50	0.2	0.3	1	-1	0.03	0.04	0.8	0.5	10	1	7228.8	0.93291
50	0.2	0.3	1	-1	0.03	0.04	1.2	0.5	10	1	5964.4	0.96955
50	0.2	0.3	1	-1	0.03	0.04	1.6	0.5	10	1	5255.8	0.97782
50	0.2	0.3	1	-1	0.03	0.04	2	0.5	10	1	4711.9	0.98818
50	0.3	0.3	1	-1	0.03	0.04	0.04	0.5	10	1	11338	0.72873
50	0.3	0.3	1	-1	0.03	0.04	0.2	0.5	10	1	9849.4	0.84291
50	0.3	0.3	1	-1	0.03	0.04	0.8	0.5	10	1	6429	0.97064
50	0.3	0.3	1	-1	0.03	0.04	1.2	0.5	10	1	5496	0.98164
50	0.3	0.3	1	-1	0.03	0.04	1.6	0.5	10	1	4883.5	0.98891
50	0.3	0.3	1	-1	0.03	0.04	2	0.5	10	1	4534.5	0.99382
50	0.4	0.3	1	-1	0.03	0.04	0.04	0.5	10	1	10409	0.84673
50	0.4	0.3	1	-1	0.03	0.04	0.2	0.5	10	1	8968.2	0.91582
50	0.4	0.3	1	-1	0.03	0.04	0.8	0.5	10	1	6291.6	0.979
50	0.4	0.3	1	-1	0.03	0.04	1.2	0.5	10	1	5510.1	0.99045
50	0.4	0.3	1	-1	0.03	0.04	1.6	0.5	10	1	4979	0.99291
50	0.4	0.3	1	-1	0.03	0.04	2	0.5	10	1	4679.2	0.99391
50	0.5	0.3	1	-1	0.03	0.04	0.04	0.5	10	1	9744.1	0.91573
50	0.5	0.3	1	-1	0.03	0.04	0.2	0.5	10	1	8635.9	0.94718
50	0.5	0.3	1	-1	0.03	0.04	0.8	0.5	10	1	6357.6	0.98364
50	0.5	0.3	1	-1	0.03	0.04	1.2	0.5	10	1	5748.9	0.99245
50	0.5	0.3	1	-1	0.03	0.04	1.6	0.5	10	1	5321.8	0.99336
50	0.5	0.3	1	-1	0.03	0.04	2	0.5	10	1	5028.4	0.99518
50	0.6	0.3	1	-1	0.03	0.04	0.04	0.5	10	1	8994.7	0.94545
50	0.6	0.3	1	-1	0.03	0.04	0.2	0.5	10	1	8184.8	0.96427
50	0.6	0.3	1	-1	0.03	0.04	0.8	0.5	10	1	6654.6	0.98618
50	0.6	0.3	1	-1	0.03	0.04	1.2	0.5	10	1	6188.8	0.992
50	0.6	0.3	1	-1	0.03	0.04	1.6	0.5	10	1	5788.3	0.992
50	0.6	0.3	1	-1	0.03	0.04	2	0.5	10	1	5555.8	0.99445
50	0.7	0.3	1	-1	0.03	0.04	0.04	0.5	10	1	8284	0.96709
50	0.7	0.3	1	-1	0.03	0.04	0.2	0.5	10	1	7929.8	0.97409
50	0.7	0.3	1	-1	0.03	0.04	0.8	0.5	10	1	7079.1	0.98527
50	0.7	0.3	1	-1	0.03	0.04	1.2	0.5	10	1	6865.6	0.98936
50	0.7	0.3	1	-1	0.03	0.04	1.6	0.5	10	1	6657.4	0.99109
50	0.7	0.3	1	-1	0.03	0.04	2	0.5	10	1	6546.8	0.99273
50	0.8	0.3	1	-1	0.03	0.04	0.04	0.5	10	1	7822.7	0.97973
50	0.8	0.3	1	-1	0.03	0.04	0.2	0.5	10	1	7714.4	0.98073
50	0.8	0.3	1	-1	0.03	0.04	0.8	0.5	10	1	7824.5	0.98418
50	0.8	0.3	1	-1	0.03	0.04	1.2	0.5	10	1	7883.8	0.98409
50	0.8	0.3	1	-1	0.03	0.04	1.6	0.5	10	1	7924.6	0.98655
50	0.8	0.3	1	-1	0.03	0.04	2	0.5	10	1	8086.7	0.98591
50	0.9	0.3	1	-1	0.03	0.04	0.04	0.5	10	1	7046.6	0.98909
50	0.9	0.3	1	-1	0.03	0.04	0.2	0.5	10	1	7580.6	0.98764
50	0.9	0.3	1	-1	0.03	0.04	0.8	0.5	10	1	9242	0.975
50	0.9	0.3	1	-1	0.03	0.04	1.2	0.5	10	1	9995	0.96445
50	0.9	0.3	1	-1	0.03	0.04	1.6	0.5	10	1	10711	0.95609
50	0.9	0.3	1	-1	0.03	0.04	2	0.5	10	1	11254	0.94945
50	0.99	0.3	1	-1	0.03	0.04	0.04	0.5	10	1	6243.3	0.99391
50	0.99	0.3	1	-1	0.03	0.04	0.2	0.5	10	1	8281.6	0.98091
50	0.99	0.3	1	-1	0.03	0.04	0.8	0.5	10	1	16405	0.613
50	0.99	0.3	1	-1	0.03	0.04	1.2	0.5	10	1	13218	0.20345
50	0.99	0.3	1	-1	0.03	0.04	1.6	0.5	10	1	7833	0.0453
50	0.99	0.3	1	-1	0.03	0.04	2	0.5	10	1	4770.9	0.011273
50	0.01	0.3	1	-1	0.03	0.04	0.04	0.9	10	1	493.18	0
50	0.01	0.3	1	-1	0.03	0.04	0.2	0.9	10	1	524.75	0
50	0.01	0.3	1	-1	0.03	0.04	0.8	0.9	10	1	699.53	0
50	0.01	0.3	1	-1	0.03	0.04	1.2	0.9	10	1	849.89	0
50	0.01	0.3	1	-1	0.03	0.04	1.6	0.9	10	1	1081.6	0.00072727
50	0.01	0.3	1	-1	0.03	0.04	2	0.9	10	1	1375.4	0.0020909
50	0.1	0.3	1	-1	0.03	0.04	0.04	0.9	10	1	4661.2	0.048182
50	0.1	0.3	1	-1	0.03	0.04	0.2	0.9	10	1	6985.7	0.17464
50	0.1	0.3	1	-1	0.03	0.04	0.8	0.9	10	1	8494.8	0.73173
50	0.1	0.3	1	-1	0.03	0.04	1.2	0.9	10	1	7287.8	0.854
50	0.1	0.3	1	-1	0.03	0.04	1.6	0.9	10	1	6465.5	0.90773
50	0.1	0.3	1	-1	0.03	0.04	2	0.9	10	1	5853	0.92727
50	0.2	0.3	1	-1	0.03	0.04	0.04	0.9	10	1	9733.5	0.75964
50	0.2	0.3	1	-1	0.03	0.04	0.2	0.9	10	1	8298.8	0.87345
50	0.2	0.3	1	-1	0.03	0.04	0.8	0.9	10	1	5637.4	0.97245
50	0.2	0.3	1	-1	0.03	0.04	1.2	0.9	10	1	4883.2	0.97982
50	0.2	0.3	1	-1	0.03	0.04	1.6	0.9	10	1	4444.3	0.98873
50	0.2	0.3	1	-1	0.03	0.04	2	0.9	10	1	4079.9	0.99182
50	0.3	0.3	1	-1	0.03	0.04	0.04	0.9	10	1	6537.7	0.963
50	0.3	0.3	1	-1	0.03	0.04	0.2	0.9	10	1	5832.4	0.98018
50	0.3	0.3	1	-1	0.03	0.04	0.8	0.9	10	1	4467.3	0.99336
50	0.3	0.3	1	-1	0.03	0.04	1.2	0.9	10	1	4072.3	0.99491
50	0.3	0.3	1	-1	0.03	0.04	1.6	0.9	10	1	3883.8	0.99655
50	0.3	0.3	1	-1	0.03	0.04	2	0.9	10	1	3702.7	0.99691
50	0.4	0.3	1	-1	0.03	0.04	0.04	0.9	10	1	4862.6	0.99418
50	0.4	0.3	1	-1	0.03	0.04	0.2	0.9	10	1	4580.1	0.99682
50	0.4	0.3	1	-1	0.03	0.04	0.8	0.9	10	1	3999.2	0.99764
50	0.4	0.3	1	-1	0.03	0.04	1.2	0.9	10	1	3882.6	0.998
50	0.4	0.3	1	-1	0.03	0.04	1.6	0.9	10	1	3706.2	0.99855
50	0.4	0.3	1	-1	0.03	0.04	2	0.9	10	1	3615.5	0.99891
50	0.5	0.3	1	-1	0.03	0.04	0.04	0.9	10	1	3985.5	0.99818
50	0.5	0.3	1	-1	0.03	0.04	0.2	0.9	10	1	3909.3	0.99873
50	0.5	0.3	1	-1	0.03	0.04	0.8	0.9	10	1	3799.3	0.99845
50	0.5	0.3	1	-1	0.03	0.04	1.2	0.9	10	1	3736.7	0.99909
50	0.5	0.3	1	-1	0.03	0.04	1.6	0.9	10	1	3692.7	0.99927
50	0.5	0.3	1	-1	0.03	0.04	2	0.9	10	1	3691.7	0.99955
50	0.6	0.3	1	-1	0.03	0.04	0.04	0.9	10	1	3459.5	0.99991
50	0.6	0.3	1	-1	0.03	0.04	0.2	0.9	10	1	3542.7	1
50	0.6	0.3	1	-1	0.03	0.04	0.8	0.9	10	1	3745.3	0.99973
50	0.6	0.3	1	-1	0.03	0.04	1.2	0.9	10	1	3829	0.99891
50	0.6	0.3	1	-1	0.03	0.04	1.6	0.9	10	1	3898.3	0.99918
50	0.6	0.3	1	-1	0.03	0.04	2	0.9	10	1	3982.5	0.99964
50	0.7	0.3	1	-1	0.03	0.04	0.04	0.9	10	1	3077.7	0.99991
50	0.7	0.3	1	-1	0.03	0.04	0.2	0.9	10	1	3224.2	1
50	0.7	0.3	1	-1	0.03	0.04	0.8	0.9	10	1	3758.1	0.99991
50	0.7	0.3	1	-1	0.03	0.04	1.2	0.9	10	1	3920.7	0.99973
50	0.7	0.3	1	-1	0.03	0.04	1.6	0.9	10	1	4169.1	0.99945
50	0.7	0.3	1	-1	0.03	0.04	2	0.9	10	1	4336.5	0.99955
50	0.8	0.3	1	-1	0.03	0.04	0.04	0.9	10	1	2766.6	1
50	0.8	0.3	1	-1	0.03	0.04	0.2	0.9	10	1	3042.4	1
50	0.8	0.3	1	-1	0.03	0.04	0.8	0.9	10	1	3781.6	0.99982
50	0.8	0.3	1	-1	0.03	0.04	1.2	0.9	10	1	4199.3	0.99982
50	0.8	0.3	1	-1	0.03	0.04	1.6	0.9	10	1	4532.3	0.99918
50	0.8	0.3	1	-1	0.03	0.04	2	0.9	10	1	4844.8	0.99955
50	0.9	0.3	1	-1	0.03	0.04	0.04	0.9	10	1	2545.1	1
50	0.9	0.3	1	-1	0.03	0.04	0.2	0.9	10	1	2823.9	0.99991
50	0.9	0.3	1	-1	0.03	0.04	0.8	0.9	10	1	3923	0.99982
50	0.9	0.3	1	-1	0.03	0.04	1.2	0.9	10	1	4645.9	0.99927
50	0.9	0.3	1	-1	0.03	0.04	1.6	0.9	10	1	5286.6	0.998
50	0.9	0.3	1	-1	0.03	0.04	2	0.9	10	1	6002.8	0.99727
50	0.99	0.3	1	-1	0.03	0.04	0.04	0.9	10	1	2314.3	1
50	0.99	0.3	1	-1	0.03	0.04	0.2	0.9	10	1	2788.5	1
50	0.99	0.3	1	-1	0.03	0.04	0.8	0.9	10	1	5979.1	0.99591
50	0.99	0.3	1	-1	0.03	0.04	1.2	0.9	10	1	10256	0.94973
50	0.99	0.3	1	-1	0.03	0.04	1.6	0.9	10	1	14507	0.72873
50	0.99	0.3	1	-1	0.03	0.04	2	0.9	10	1	13430	0.31773
50	0.01	0.4	1	-1	0.03	0.04	0.04	0.1	10	1	7907	0.13027
50	0.01	0.4	1	-1	0.03	0.04	0.2	0.1	10	1	7859.4	0.15764
50	0.01	0.4	1	-1	0.03	0.04	0.8	0.1	10	1	8675	0.2475
50	0.01	0.4	1	-1	0.03	0.04	1.2	0.1	10	1	8838	0.29509
50	0.01	0.4	1	-1	0.03	0.04	1.6	0.1	10	1	9043.1	0.328
50	0.01	0.4	1	-1	0.03	0.04	2	0.1	10	1	9119.7	0.37818
50	0.1	0.4	1	-1	0.03	0.04	0.04	0.1	10	1	9811.1	0.24536
50	0.1	0.4	1	-1	0.03	0.04	0.2	0.1	10	1	10876	0.37136
50	0.1	0.4	1	-1	0.03	0.04	0.8	0.1	10	1	9880.6	0.75527
50	0.1	0.4	1	-1	0.03	0.04	1.2	0.1	10	1	8606	0.86191
50	0.1	0.4	1	-1	0.03	0.04	1.6	0.1	10	1	7306.6	0.91809
50	0.1	0.4	1	-1	0.03	0.04	2	0.1	10	1	6684.2	0.94282
50	0.2	0.4	1	-1	0.03	0.04	0.04	0.1	10	1	11053	0.29864
50	0.2	0.4	1	-1	0.03	0.04	0.2	0.1	10	1	12002	0.47055
50	0.2	0.4	1	-1	0.03	0.04	0.8	0.1	10	1	9223.9	0.86
50	0.2	0.4	1	-1	0.03	0.04	1.2	0.1	10	1	7638.5	0.937
50	0.2	0.4	1	-1	0.03	0.04	1.6	0.1	10	1	6534.6	0.96627
50	0.2	0.4	1	-1	0.03	0.04	2	0.1	10	1	5761.1	0.97745
50	0.3	0.4	1	-1	0.03	0.04	0.04	0.1	10	1	12356	0.33955
50	0.3	0.4	1	-1	0.03	0.04	0.2	0.1	10	1	13046	0.51482
50	0.3	0.4	1	-1	0.03	0.04	0.8	0.1	10	1	9457.9	0.89682
50	0.3	0.4	1	-1	0.03	0.04	1.2	0.1	10	1	7605.6	0.95391
50	0.3	0.4	1	-1	0.03	0.04	1.6	0.1	10	1	6416.6	0.97518
50	0.3	0.4	1	-1	0.03	0.04	2	0.1	10	1	5616.9	0.98482
50	0.4	0.4	1	-1	0.03	0.04	0.04	0.1	10	1	13734	0.37127
50	0.4	0.4	1	-1	0.03	0.04	0.2	0.1	10	1	14019	0.54655
50	0.4	0.4	1	-1	0.03	0.04	0.8	0.1	10	1	10127	0.90418
50	0.4	0.4	1	-1	0.03	0.04	1.2	0.1	10	1	8214.6	0.95855
50	0.4	0.4	1	-1	0.03	0.04	1.6	0.1	10	1	6933	0.97627
50	0.4	0.4	1	-1	0.03	0.04	2	0.1	10	1	6056.4	0.98645
50	0.5	0.4	1	-1	0.03	0.04	0.04	0.1	10	1	15177	0.38964
50	0.5	0.4	1	-1	0.03	0.04	0.2	0.1	10	1	15274	0.56509
50	0.5	0.4	1	-1	0.03	0.04	0.8	0.1	10	1	11127	0.89709
50	0.5	0.4	1	-1	0.03	0.04	1.2	0.1	10	1	9048.8	0.95545
50	0.5	0.4	1	-1	0.03	0.04	1.6	0.1	10	1	7757.9	0.97309
50	0.5	0.4	1	-1	0.03	0.04	2	0.1	10	1	6815.3	0.98509
50	0.6	0.4	1	-1	0.03	0.04	0.04	0.1	10	1	16107	0.41309
50	0.6	0.4	1	-1	0.03	0.04	0.2	0.1	10	1	16541	0.55573
50	0.6	0.4	1	-1	0.03	0.04	0.8	0.1	10	1	12727	0.88818
50	0.6	0.4	1	-1	0.03	0.04	1.2	0.1	10	1	10388	0.94409
50	0.6	0.4	1	-1	0.03	0.04	1.6	0.1	10	1	9030.9	0.97009
50	0.6	0.4	1	-1	0.03	0.04	2	0.1	10	1	8074.7	0.981
50	0.7	0.4	1	-1	0.03	0.04	0.04	0.1	10	1	17763	0.42891
50	0.7	0.4	1	-1	0.03	0.04	0.2	0.1	10	1	18230	0.56473
50	0.7	0.4	1	-1	0.03	0.04	0.8	0.1	10	1	14952	0.84973
50	0.7	0.4	1	-1	0.03	0.04	1.2	0.1	10	1	12460	0.92336
50	0.7	0.4	1	-1	0.03	0.04	1.6	0.1	10	1	11092	0.95155
50	0.7	0.4	1	-1	0.03	0.04	2	0.1	10	1	9980.6	0.96945
50	0.8	0.4	1	-1	0.03	0.04	0.04	0.1	10	1	19173	0.45291
50	0.8	0.4	1	-1	0.03	0.04	0.2	0.1	10	1	19347	0.54445
50	0.8	0.4	1	-1	0.03	0.04	0.8	0.1	10	1	17474	0.78564
50	0.8	0.4	1	-1	0.03	0.04	1.2	0.1	10	1	15692	0.85427
50	0.8	0.4	1	-1	0.03	0.04	1.6	0.1	10	1	14389	0.89536
50	0.8	0.4	1	-1	0.03	0.04	2	0.1	10	1	13529	0.92636
50	0.9	0.4	1	-1	0.03	0.04	0.04	0.1	10	1	20618	0.46118
50	0.9	0.4	1	-1	0.03	0.04	0.2	0.1	10	1	20347	0.50082
50	0.9	0.4	1	-1	0.03	0.04	0.8	0.1	10	1	20222	0.6
50	0.9	0.4	1	-1	0.03	0.04	1.2	0.1	10	1	20036	0.65282
50	0.9	0.4	1	-1	0.03	0.04	1.6	0.1	10	1	19782	0.69473
50	0.9	0.4	1	-1	0.03	0.04	2	0.1	10	1	19033	0.71527
50	0.99	0.4	1	-1	0.03	0.04	0.04	0.1	10	1	21128	0.43427
50	0.99	0.4	1	-1	0.03	0.04	0.2	0.1	10	1	19039	0.27827
50	0.99	0.4	1	-1	0.03	0.04	0.8	0.1	10	1	9824.3	0.035273
50	0.99	0.4	1	-1	0.03	0.04	1.2	0.1	10	1	6445.2	0.0071818
50	0.99	0.4	1	-1	0.03	0.04	1.6	0.1	10	1	4616.2	0.0024545
50	0.99	0.4	1	-1	0.03	0.04	2	0.1	10	1	3590.9	0.00090909
50	0.01	0.4	1	-1	0.03	0.04	0.04	0.5	10	1	2006.2	0.00036364
50	0.01	0.4	1	-1	0.03	0.04	0.2	0.5	10	1	2110.6	0.0011818
50	0.01	0.4	1	-1	0.03	0.04	0.8	0.5	10	1	2683.3	0.0061818
50	0.01	0.4	1	-1	0.03	0.04	1.2	0.5	10	1	3104.1	0.010818
50	0.01	0.4	1	-1	0.03	0.04	1.6	0.5	10	1	3664.2	0.027909
50	0.01	0.4	1	-1	0.03	0.04	2	0.5	10	1	4160	0.042182
50	0.1	0.4	1	-1	0.03	0.04	0.04	0.5	10	1	6582.6	0.073727
50	0.1	0.4	1	-1	0.03	0.04	0.2	0.5	10	1	8273.8	0.15509
50	0.1	0.4	1	-1	0.03	0.04	0.8	0.5	10	1	10454	0.64945
50	0.1	0.4	1	-1	0.03	0.04	1.2	0.5	10	1	9066.8	0.82118
50	0.1	0.4	1	-1	0.03	0.04	1.6	0.5	10	1	7751	0.89191
50	0.1	0.4	1	-1	0.03	0.04	2	0.5	10	1	6993.1	0.92491
50	0.2	0.4	1	-1	0.03	0.04	0.04	0.5	10	1	10901	0.29936
50	0.2	0.4	1	-1	0.03	0.04	0.2	0.5	10	1	11775	0.50218
50	0.2	0.4	1	-1	0.03	0.04	0.8	0.5	10	1	8460.3	0.90191
50	0.2	0.4	1	-1	0.03	0.04	1.2	0.5	10	1	6866.1	0.95018
50	0.2	0.4	1	-1	0.03	0.04	1.6	0.5	10	1	5846.4	0.97273
50	0.2	0.4	1	-1	0.03	0.04	2	0.5	10	1	5296.1	0.98473
50	0.3	0.4	1	-1	0.03	0.04	0.04	0.5	10	1	13146	0.53818
50	0.3	0.4	1	-1	0.03	0.04	0.2	0.5	10	1	12192	0.72782
50	0.3	0.4	1	-1	0.03	0.04	0.8	0.5	10	1	7583.3	0.95827
50	0.3	0.4	1	-1	0.03	0.04	1.2	0.5	10	1	6169	0.97909
50	0.3	0.4	1	-1	0.03	0.04	1.6	0.5	10	1	5416.3	0.99009
50	0.3	0.4	1	-1	0.03	0.04	2	0.5	10	1	4889.7	0.99236
50	0.4	0.4	1	-1	0.03	0.04	0.04	0.5	10	1	13196	0.72245
50	0.4	0.4	1	-1	0.03	0.04	0.2	0.5	10	1	11391	0.84718
50	0.4	0.4	1	-1	0.03	0.04	0.8	0.5	10	1	7362.2	0.97182
50	0.4	0.4	1	-1	0.03	0.04	1.2	0.5	10	1	6171.5	0.98436
50	0.4	0.4	1	-1	0.03	0.04	1.6	0.5	10	1	5435.7	0.99164
50	0.4	0.4	1	-1	0.03	0.04	2	0.5	10	1	5020.1	0.99464
50	0.5	0.4	1	-1	0.03	0.04	0.04	0.5	10	1	12637	0.82564
50	0.5	0.4	1	-1	0.03	0.04	0.2	0.5	10	1	10956	0.90291
50	0.5	0.4	1	-1	0.03	0.04	0.8	0.5	10	1	7322	0.98091
50	0.5	0.4	1	-1	0.03	0.04	1.2	0.5	10	1	6383.4	0.98918
50	0.5	0.4	1	-1	0.03	0.04	1.6	0.5	10	1	5726.9	0.99455
50	0.5	0.4	1	-1	0.03	0.04	2	0.5	10	1	5308.7	0.995
50	0.6	0.4	1	-1	0.03	0.04	0.04	0.5	10	1	12082	0.89809
50	0.6	0.4	1	-1	0.03	0.04	0.2	0.5	10	1	10661	0.939
50	0.6	0.4	1	-1	0.03	0.04	0.8	0.5	10	1	7716.3	0.984
50	0.6	0.4	1	-1	0.03	0.04	1.2	0.5	10	1	6849	0.98927
50	0.6	0.4	1	-1	0.03	0.04	1.6	0.5	10	1	6365.7	0.99236
50	0.6	0.4	1	-1	0.03	0.04	2	0.5	10	1	5851.8	0.99645
50	0.7	0.4	1	-1	0.03	0.04	0.04	0.5	10	1	11102	0.94164
50	0.7	0.4	1	-1	0.03	0.04	0.2	0.5	10	1	10325	0.95673
50	0.7	0.4	1	-1	0.03	0.04	0.8	0.5	10	1	8183.1	0.98464
50	0.7	0.4	1	-1	0.03	0.04	1.2	0.5	10	1	7549	0.99027
50	0.7	0.4	1	-1	0.03	0.04	1.6	0.5	10	1	7050.9	0.99255
50	0.7	0.4	1	-1	0.03	0.04	2	0.5	10	1	6839.5	0.99327
50	0.8	0.4	1	-1	0.03	0.04	0.04	0.5	10	1	10480	0.96464
50	0.8	0.4	1	-1	0.03	0.04	0.2	0.5	10	1	9934.6	0.97036
50	0.8	0.4	1	-1	0.03	0.04	0.8	0.5	10	1	9105.8	0.98355
50	0.8	0.4	1	-1	0.03	0.04	1.2	0.5	10	1	8864.1	0.98455
50	0.8	0.4	1	-1	0.03	0.04	1.6	0.5	10	1	8509.7	0.986
50	0.8	0.4	1	-1	0.03	0.04	2	0.5	10	1	8351	0.98818
50	0.9	0.4	1	-1	0.03	0.04	0.04	0.5	10	1	9552	0.97709
50	0.9	0.4	1	-1	0.03	0.04	0.2	0.5	10	1	9826.7	0.97709
50	0.9	0.4	1	-1	0.03	0.04	0.8	0.5	10	1	10592	0.96991
50	0.9	0.4	1	-1	0.03	0.04	1.2	0.5	10	1	11145	0.96955
50	0.9	0.4	1	-1	0.03	0.04	1.6	0.5	10	1	11535	0.96409
50	0.9	0.4	1	-1	0.03	0.04	2	0.5	10	1	11688	0.96227
50	0.99	0.4	1	-1	0.03	0.04	0.04	0.5	10	1	8374.4	0.98782
50	0.99	0.4	1	-1	0.03	0.04	0.2	0.5	10	1	10939	0.96782
50	0.99	0.4	1	-1	0.03	0.04	0.8	0.5	10	1	19456	0.58482
50	0.99	0.4	1	-1	0.03	0.04	1.2	0.5	10	1	15563	0.20209
50	0.99	0.4	1	-1	0.03	0.04	1.6	0.5	10	1	9441.4	0.052273
50	0.99	0.4	1	-1	0.03	0.04	2	0.5	10	1	5976.1	0.013182
50	0.01	0.4	1	-1	0.03	0.04	0.04	0.9	10	1	435.72	0
50	0.01	0.4	1	-1	0.03	0.04	0.2	0.9	10	1	459.36	0
50	0.01	0.4	1	-1	0.03	0.04	0.8	0.9	10	1	578.25	0
50	0.01	0.4	1	-1	0.03	0.04	1.2	0.9	10	1	672.1	0
50	0.01	0.4	1	-1	0.03	0.04	1.6	0.9	10	1	829.41	0.00018182
50	0.01	0.4	1	-1	0.03	0.04	2	0.9	10	1	978.23	0.00036364
50	0.1	0.4	1	-1	0.03	0.04	0.04	0.9	10	1	2104.3	0.0033636
50	0.1	0.4	1	-1	0.03	0.04	0.2	0.9	10	1	3314.4	0.015636
50	0.1	0.4	1	-1	0.03	0.04	0.8	0.9	10	1	9502.4	0.432
50	0.1	0.4	1	-1	0.03	0.04	1.2	0.9	10	1	9197.3	0.69482
50	0.1	0.4	1	-1	0.03	0.04	1.6	0.9	10	1	8008.3	0.81682
50	0.1	0.4	1	-1	0.03	0.04	2	0.9	10	1	7236.1	0.87527
50	0.2	0.4	1	-1	0.03	0.04	0.04	0.9	10	1	9831	0.26182
50	0.2	0.4	1	-1	0.03	0.04	0.2	0.9	10	1	11347	0.53491
50	0.2	0.4	1	-1	0.03	0.04	0.8	0.9	10	1	7629.1	0.92318
50	0.2	0.4	1	-1	0.03	0.04	1.2	0.9	10	1	6209.4	0.96073
50	0.2	0.4	1	-1	0.03	0.04	1.6	0.9	10	1	5419	0.97464
50	0.2	0.4	1	-1	0.03	0.04	2	0.9	10	1	4887.5	0.98355
50	0.3	0.4	1	-1	0.03	0.04	0.04	0.9	10	1	11261	0.80436
50	0.3	0.4	1	-1	0.03	0.04	0.2	0.9	10	1	9310.4	0.90045
50	0.3	0.4	1	-1	0.03	0.04	0.8	0.9	10	1	5936.9	0.981
50	0.3	0.4	1	-1	0.03	0.04	1.2	0.9	10	1	5044.5	0.98827
50	0.3	0.4	1	-1	0.03	0.04	1.6	0.9	10	1	4618.2	0.99391
50	0.3	0.4	1	-1	0.03	0.04	2	0.9	10	1	4265.9	0.99491
50	0.4	0.4	1	-1	0.03	0.04	0.04	0.9	10	1	8187.1	0.95682
50	0.4	0.4	1	-1	0.03	0.04	0.2	0.9	10	1	6985	0.97691
50	0.4	0.4	1	-1	0.03	0.04	0.8	0.9	10	1	5125.9	0.99373
50	0.4	0.4	1	-1	0.03	0.04	1.2	0.9	10	1	4614.9	0.99609
50	0.4	0.4	1	-1	0.03	0.04	1.6	0.9	10	1	4331	0.99736
50	0.4	0.4	1	-1	0.03	0.04	2	0.9	10	1	4115.3	0.99791
50	0.5	0.4	1	-1	0.03	0.04	0.04	0.9	10	1	6286.2	0.98945
50	0.5	0.4	1	-1	0.03	0.04	0.2	0.9	10	1	5737.6	0.99473
50	0.5	0.4	1	-1	0.03	0.04	0.8	0.9	10	1	4763.9	0.99764
50	0.5	0.4	1	-1	0.03	0.04	1.2	0.9	10	1	4459.3	0.99727
50	0.5	0.4	1	-1	0.03	0.04	1.6	0.9	10	1	4367.4	0.99864
50	0.5	0.4	1	-1	0.03	0.04	2	0.9	10	1	4214.2	0.99855
50	0.6	0.4	1	-1	0.03	0.04	0.04	0.9	10	1	5243.1	0.99791
50	0.6	0.4	1	-1	0.03	0.04	0.2	0.9	10	1	5076.5	0.99773
50	0.6	0.4	1	-1	0.03	0.04	0.8	0.9	10	1	4685.3	0.99855
50	0.6	0.4	1	-1	0.03	0.04	1.2	0.9	10	1	4551.7	0.99936
50	0.6	0.4	1	-1	0.03	0.04	1.6	0.9	10	1	4452.1	0.99855
50	0.6	0.4	1	-1	0.03	0.04	2	0.9	10	1	4396.4	0.99927
50	0.7	0.4	1	-1	0.03	0.04	0.04	0.9	10	1	4466.3	0.99936
50	0.7	0.4	1	-1	0.03	0.04	0.2	0.9	10	1	4504.8	0.99964
50	0.7	0.4	1	-1	0.03	0.04	0.8	0.9	10	1	4644.4	0.99936
50	0.7	0.4	1	-1	0.03	0.04	1.2	0.9	10	1	4691.9	0.99945
50	0.7	0.4	1	-1	0.03	0.04	1.6	0.9	10	1	4746.7	0.99918
50	0.7	0.4	1	-1	0.03	0.04	2	0.9	10	1	4782.3	0.99955
50	0.8	0.4	1	-1	0.03	0.04	0.04	0.9	10	1	3950.1	0.99964
50	0.8	0.4	1	-1	0.03	0.04	0.2	0.9	10	1	4113.7	0.99991
50	0.8	0.4	1	-1	0.03	0.04	0.8	0.9	10	1	4698.6	0.99955
50	0.8	0.4	1	-1	0.03	0.04	1.2	0.9	10	1	5107.5	0.99955
50	0.8	0.4	1	-1	0.03	0.04	1.6	0.9	10	1	5248.9	0.99955
50	0.8	0.4	1	-1	0.03	0.04	2	0.9	10	1	5498.7	0.99909
50	0.9	0.4	1	-1	0.03	0.04	0.04	0.9	10	1	3511	1
50	0.9	0.4	1	-1	0.03	0.04	0.2	0.9	10	1	3804	0.99982
50	0.9	0.4	1	-1	0.03	0.04	0.8	0.9	10	1	4939	0.99936
50	0.9	0.4	1	-1	0.03	0.04	1.2	0.9	10	1	5656.9	0.998
50	0.9	0.4	1	-1	0.03	0.04	1.6	0.9	10	1	6233	0.99873
50	0.9	0.4	1	-1	0.03	0.04	2	0.9	10	1	6779.7	0.99618
50	0.99	0.4	1	-1	0.03	0.04	0.04	0.9	10	1	3139	0.99973
50	0.99	0.4	1	-1	0.03	0.04	0.2	0.9	10	1	3813.8	1
50	0.99	0.4	1	-1	0.03	0.04	0.8	0.9	10	1	8005.3	0.99027
50	0.99	0.4	1	-1	0.03	0.04	1.2	0.9	10	1	12957	0.91982
50	0.99	0.4	1	-1	0.03	0.04	1.6	0.9	10	1	17090	0.67109
50	0.99	0.4	1	-1	0.03	0.04	2	0.9	10	1	14799	0.29736
50	0.01	0.5	1	-1	0.03	0.04	0.04	0.1	10	1	7780.2	0.11709
50	0.01	0.5	1	-1	0.03	0.04	0.2	0.1	10	1	8066.7	0.13236
50	0.01	0.5	1	-1	0.03	0.04	0.8	0.1	10	1	8648.5	0.20255
50	0.01	0.5	1	-1	0.03	0.04	1.2	0.1	10	1	8842.3	0.25391
50	0.01	0.5	1	-1	0.03	0.04	1.6	0.1	10	1	9097.7	0.28391
50	0.01	0.5	1	-1	0.03	0.04	2	0.1	10	1	9304.9	0.31755
50	0.1	0.5	1	-1	0.03	0.04	0.04	0.1	10	1	10119	0.21764
50	0.1	0.5	1	-1	0.03	0.04	0.2	0.1	10	1	11056	0.34745
50	0.1	0.5	1	-1	0.03	0.04	0.8	0.1	10	1	10474	0.745
50	0.1	0.5	1	-1	0.03	0.04	1.2	0.1	10	1	9001.2	0.86191
50	0.1	0.5	1	-1	0.03	0.04	1.6	0.1	10	1	7712	0.91709
50	0.1	0.5	1	-1	0.03	0.04	2	0.1	10	1	6883.7	0.94509
50	0.2	0.5	1	-1	0.03	0.04	0.04	0.1	10	1	11777	0.26973
50	0.2	0.5	1	-1	0.03	0.04	0.2	0.1	10	1	12794	0.44673
50	0.2	0.5	1	-1	0.03	0.04	0.8	0.1	10	1	9779.1	0.868
50	0.2	0.5	1	-1	0.03	0.04	1.2	0.1	10	1	7857.8	0.94027
50	0.2	0.5	1	-1	0.03	0.04	1.6	0.1	10	1	6561.6	0.97091
50	0.2	0.5	1	-1	0.03	0.04	2	0.1	10	1	5769.3	0.98018
50	0.3	0.5	1	-1	0.03	0.04	0.04	0.1	10	1	13160	0.305
50	0.3	0.5	1	-1	0.03	0.04	0.2	0.1	10	1	14129	0.50245
50	0.3	0.5	1	-1	0.03	0.04	0.8	0.1	10	1	9997.1	0.90482
50	0.3	0.5	1	-1	0.03	0.04	1.2	0.1	10	1	7797.1	0.96118
50	0.3	0.5	1	-1	0.03	0.04	1.6	0.1	10	1	6448.5	0.97991
50	0.3	0.5	1	-1	0.03	0.04	2	0.1	10	1	5683	0.98818
50	0.4	0.5	1	-1	0.03	0.04	0.04	0.1	10	1	14530	0.34164
50	0.4	0.5	1	-1	0.03	0.04	0.2	0.1	10	1	15295	0.53855
50	0.4	0.5	1	-1	0.03	0.04	0.8	0.1	10	1	10466	0.91145
50	0.4	0.5	1	-1	0.03	0.04	1.2	0.1	10	1	8233.2	0.96227
50	0.4	0.5	1	-1	0.03	0.04	1.6	0.1	10	1	6886.7	0.98464
50	0.4	0.5	1	-1	0.03	0.04	2	0.1	10	1	6021.7	0.99127
50	0.5	0.5	1	-1	0.03	0.04	0.04	0.1	10	1	16536	0.36236
50	0.5	0.5	1	-1	0.03	0.04	0.2	0.1	10	1	16998	0.55909
50	0.5	0.5	1	-1	0.03	0.04	0.8	0.1	10	1	11790	0.91273
50	0.5	0.5	1	-1	0.03	0.04	1.2	0.1	10	1	9129.8	0.96045
50	0.5	0.5	1	-1	0.03	0.04	1.6	0.1	10	1	7571.4	0.98291
50	0.5	0.5	1	-1	0.03	0.04	2	0.1	10	1	6621.4	0.99045
50	0.6	0.5	1	-1	0.03	0.04	0.04	0.1	10	1	18021	0.38382
50	0.6	0.5	1	-1	0.03	0.04	0.2	0.1	10	1	18471	0.55964
50	0.6	0.5	1	-1	0.03	0.04	0.8	0.1	10	1	13189	0.90282
50	0.6	0.5	1	-1	0.03	0.04	1.2	0.1	10	1	10536	0.95482
50	0.6	0.5	1	-1	0.03	0.04	1.6	0.1	10	1	8817.7	0.97691
50	0.6	0.5	1	-1	0.03	0.04	2	0.1	10	1	7804	0.98636
50	0.7	0.5	1	-1	0.03	0.04	0.04	0.1	10	1	19857	0.406
50	0.7	0.5	1	-1	0.03	0.04	0.2	0.1	10	1	19796	0.5517
50	0.7	0.5	1	-1	0.03	0.04	0.8	0.1	10	1	15519	0.87927
50	0.7	0.5	1	-1	0.03	0.04	1.2	0.1	10	1	12923	0.94664
50	0.7	0.5	1	-1	0.03	0.04	1.6	0.1	10	1	11003	0.97164
50	0.7	0.5	1	-1	0.03	0.04	2	0.1	10	1	9699	0.98109
50	0.8	0.5	1	-1	0.03	0.04	0.04	0.1	10	1	21605	0.42555
50	0.8	0.5	1	-1	0.03	0.04	0.2	0.1	10	1	21904	0.54545
50	0.8	0.5	1	-1	0.03	0.04	0.8	0.1	10	1	19033	0.82182
50	0.8	0.5	1	-1	0.03	0.04	1.2	0.1	10	1	16272	0.90064
50	0.8	0.5	1	-1	0.03	0.04	1.6	0.1	10	1	14480	0.93609
50	0.8	0.5	1	-1	0.03	0.04	2	0.1	10	1	13097	0.95936
50	0.9	0.5	1	-1	0.03	0.04	0.04	0.1	10	1	24189	0.44064
50	0.9	0.5	1	-1	0.03	0.04	0.2	0.1	10	1	24158	0.50191
50	0.9	0.5	1	-1	0.03	0.04	0.8	0.1	10	1	23040	0.67255
50	0.9	0.5	1	-1	0.03	0.04	1.2	0.1	10	1	22104	0.74045
50	0.9	0.5	1	-1	0.03	0.04	1.6	0.1	10	1	21413	0.78818
50	0.9	0.5	1	-1	0.03	0.04	2	0.1	10	1	20380	0.82318
50	0.99	0.5	1	-1	0.03	0.04	0.04	0.1	10	1	25370	0.42245
50	0.99	0.5	1	-1	0.03	0.04	0.2	0.1	10	1	22936	0.27982
50	0.99	0.5	1	-1	0.03	0.04	0.8	0.1	10	1	12273	0.0436
50	0.99	0.5	1	-1	0.03	0.04	1.2	0.1	10	1	8341.9	0.013909
50	0.99	0.5	1	-1	0.03	0.04	1.6	0.1	10	1	6274.3	0.0040909
50	0.99	0.5	1	-1	0.03	0.04	2	0.1	10	1	4890.9	0.0015455
50	0.01	0.5	1	-1	0.03	0.04	0.04	0.5	10	1	1729.9	0.00018182
50	0.01	0.5	1	-1	0.03	0.04	0.2	0.5	10	1	1816.9	0.00018182
50	0.01	0.5	1	-1	0.03	0.04	0.8	0.5	10	1	2213.2	0.0017273
50	0.01	0.5	1	-1	0.03	0.04	1.2	0.5	10	1	2571.3	0.0054545
50	0.01	0.5	1	-1	0.03	0.04	1.6	0.5	10	1	2901.8	0.012182
50	0.01	0.5	1	-1	0.03	0.04	2	0.5	10	1	3282.2	0.019
50	0.1	0.5	1	-1	0.03	0.04	0.04	0.5	10	1	5207.6	0.027364
50	0.1	0.5	1	-1	0.03	0.04	0.2	0.5	10	1	6720.2	0.066182
50	0.1	0.5	1	-1	0.03	0.04	0.8	0.5	10	1	11188	0.50664
50	0.1	0.5	1	-1	0.03	0.04	1.2	0.5	10	1	10284	0.73536
50	0.1	0.5	1	-1	0.03	0.04	1.6	0.5	10	1	8927	0.85027
50	0.1	0.5	1	-1	0.03	0.04	2	0.5	10	1	7826.9	0.90245
50	0.2	0.5	1	-1	0.03	0.04	0.04	0.5	10	1	9463.1	0.13518
50	0.2	0.5	1	-1	0.03	0.04	0.2	0.5	10	1	11718	0.31818
50	0.2	0.5	1	-1	0.03	0.04	0.8	0.5	10	1	10044	0.85264
50	0.2	0.5	1	-1	0.03	0.04	1.2	0.5	10	1	7880.2	0.93936
50	0.2	0.5	1	-1	0.03	0.04	1.6	0.5	10	1	6521.6	0.96755
50	0.2	0.5	1	-1	0.03	0.04	2	0.5	10	1	5677.7	0.98136
50	0.3	0.5	1	-1	0.03	0.04	0.04	0.5	10	1	13148	0.33527
50	0.3	0.5	1	-1	0.03	0.04	0.2	0.5	10	1	13873	0.57
50	0.3	0.5	1	-1	0.03	0.04	0.8	0.5	10	1	8970.6	0.93191
50	0.3	0.5	1	-1	0.03	0.04	1.2	0.5	10	1	6967.8	0.97236
50	0.3	0.5	1	-1	0.03	0.04	1.6	0.5	10	1	5939.4	0.98545
50	0.3	0.5	1	-1	0.03	0.04	2	0.5	10	1	5211.5	0.99082
50	0.4	0.5	1	-1	0.03	0.04	0.04	0.5	10	1	15556	0.52464
50	0.4	0.5	1	-1	0.03	0.04	0.2	0.5	10	1	14333	0.73409
50	0.4	0.5	1	-1	0.03	0.04	0.8	0.5	10	1	8499.6	0.96064
50	0.4	0.5	1	-1	0.03	0.04	1.2	0.5	10	1	6829.9	0.98209
50	0.4	0.5	1	-1	0.03	0.04	1.6	0.5	10	1	5889.2	0.99164
50	0.4	0.5	1	-1	0.03	0.04	2	0.5	10	1	5270	0.99436
50	0.5	0.5	1	-1	0.03	0.04	0.04	0.5	10	1	16072	0.68673
50	0.5	0.5	1	-1	0.03	0.04	0.2	0.5	10	1	14034	0.83127
50	0.5	0.5	1	-1	0.03	0.04	0.8	0.5	10	1	8465	0.97391
50	0.5	0.5	1	-1	0.03	0.04	1.2	0.5	10	1	6935.6	0.98691
50	0.5	0.5	1	-1	0.03	0.04	1.6	0.5	10	1	6189.7	0.99427
50	0.5	0.5	1	-1	0.03	0.04	2	0.5	10	1	5557.7	0.99564
50	0.6	0.5	1	-1	0.03	0.04	0.04	0.5	10	1	16211	0.80218
50	0.6	0.5	1	-1	0.03	0.04	0.2	0.5	10	1	13537	0.89364
50	0.6	0.5	1	-1	0.03	0.04	0.8	0.5	10	1	8862.8	0.97673
50	0.6	0.5	1	-1	0.03	0.04	1.2	0.5	10	1	7555.9	0.99027
50	0.6	0.5	1	-1	0.03	0.04	1.6	0.5	10	1	6645.5	0.99291
50	0.6	0.5	1	-1	0.03	0.04	2	0.5	10	1	6166.9	0.99527
50	0.7	0.5	1	-1	0.03	0.04	0.04	0.5	10	1	15001	0.88373
50	0.7	0.5	1	-1	0.03	0.04	0.2	0.5	10	1	13531	0.92918
50	0.7	0.5	1	-1	0.03	0.04	0.8	0.5	10	1	9568	0.981
50	0.7	0.5	1	-1	0.03	0.04	1.2	0.5	10	1	8334.5	0.98955
50	0.7	0.5	1	-1	0.03	0.04	1.6	0.5	10	1	7567.2	0.99327
50	0.7	0.5	1	-1	0.03	0.04	2	0.5	10	1	7121.3	0.99609
50	0.8	0.5	1	-1	0.03	0.04	0.04	0.5	10	1	14298	0.92618
50	0.8	0.5	1	-1	0.03	0.04	0.2	0.5	10	1	13049	0.94827
50	0.8	0.5	1	-1	0.03	0.04	0.8	0.5	10	1	10691	0.97991
50	0.8	0.5	1	-1	0.03	0.04	1.2	0.5	10	1	9816	0.987
50	0.8	0.5	1	-1	0.03	0.04	1.6	0.5	10	1	9120.6	0.98927
50	0.8	0.5	1	-1	0.03	0.04	2	0.5	10	1	8817	0.99127
50	0.9	0.5	1	-1	0.03	0.04	0.04	0.5	10	1	13029	0.96191
50	0.9	0.5	1	-1	0.03	0.04	0.2	0.5	10	1	12926	0.96345
50	0.9	0.5	1	-1	0.03	0.04	0.8	0.5	10	1	12606	0.96445
50	0.9	0.5	1	-1	0.03	0.04	1.2	0.5	10	1	12685	0.96636
50	0.9	0.5	1	-1	0.03	0.04	1.6	0.5	10	1	12562	0.96882
50	0.9	0.5	1	-1	0.03	0.04	2	0.5	10	1	12508	0.97018
50	0.99	0.5	1	-1	0.03	0.04	0.04	0.5	10	1	11761	0.97782
50	0.99	0.5	1	-1	0.03	0.04	0.2	0.5	10	1	14681	0.94918
50	0.99	0.5	1	-1	0.03	0.04	0.8	0.5	10	1	23366	0.54464
50	0.99	0.5	1	-1	0.03	0.04	1.2	0.5	10	1	18555	0.20927
50	0.99	0.5	1	-1	0.03	0.04	1.6	0.5	10	1	12541	0.062455
50	0.99	0.5	1	-1	0.03	0.04	2	0.5	10	1	7901.5	0.019818
50	0.01	0.5	1	-1	0.03	0.04	0.04	0.9	10	1	398.69	0
50	0.01	0.5	1	-1	0.03	0.04	0.2	0.9	10	1	416.65	0
50	0.01	0.5	1	-1	0.03	0.04	0.8	0.9	10	1	499.77	0
50	0.01	0.5	1	-1	0.03	0.04	1.2	0.9	10	1	584.68	0
50	0.01	0.5	1	-1	0.03	0.04	1.6	0.9	10	1	676.27	0
50	0.01	0.5	1	-1	0.03	0.04	2	0.9	10	1	789.52	0
50	0.1	0.5	1	-1	0.03	0.04	0.04	0.9	10	1	1352.5	0.00036364
50	0.1	0.5	1	-1	0.03	0.04	0.2	0.9	10	1	1885.4	0.0011818
50	0.1	0.5	1	-1	0.03	0.04	0.8	0.9	10	1	7315.5	0.14618
50	0.1	0.5	1	-1	0.03	0.04	1.2	0.9	10	1	10070	0.46327
50	0.1	0.5	1	-1	0.03	0.04	1.6	0.9	10	1	9758	0.69173
50	0.1	0.5	1	-1	0.03	0.04	2	0.9	10	1	8670.3	0.80473
50	0.2	0.5	1	-1	0.03	0.04	0.04	0.9	10	1	5033.1	0.025909
50	0.2	0.5	1	-1	0.03	0.04	0.2	0.9	10	1	8220.7	0.13618
50	0.2	0.5	1	-1	0.03	0.04	0.8	0.9	10	1	10338	0.80245
50	0.2	0.5	1	-1	0.03	0.04	1.2	0.9	10	1	8032.6	0.91445
50	0.2	0.5	1	-1	0.03	0.04	1.6	0.9	10	1	6579.1	0.95618
50	0.2	0.5	1	-1	0.03	0.04	2	0.9	10	1	5797	0.97409
50	0.3	0.5	1	-1	0.03	0.04	0.04	0.9	10	1	12833	0.34345
50	0.3	0.5	1	-1	0.03	0.04	0.2	0.9	10	1	13395	0.63145
50	0.3	0.5	1	-1	0.03	0.04	0.8	0.9	10	1	7977.5	0.95091
50	0.3	0.5	1	-1	0.03	0.04	1.2	0.9	10	1	6268.2	0.98064
50	0.3	0.5	1	-1	0.03	0.04	1.6	0.9	10	1	5398.6	0.98582
50	0.3	0.5	1	-1	0.03	0.04	2	0.9	10	1	4845.5	0.99118
50	0.4	0.5	1	-1	0.03	0.04	0.04	0.9	10	1	13525	0.77564
50	0.4	0.5	1	-1	0.03	0.04	0.2	0.9	10	1	11268	0.89218
50	0.4	0.5	1	-1	0.03	0.04	0.8	0.9	10	1	6748.4	0.98573
50	0.4	0.5	1	-1	0.03	0.04	1.2	0.9	10	1	5669.5	0.99118
50	0.4	0.5	1	-1	0.03	0.04	1.6	0.9	10	1	5026.3	0.99518
50	0.4	0.5	1	-1	0.03	0.04	2	0.9	10	1	4608.9	0.99682
50	0.5	0.5	1	-1	0.03	0.04	0.04	0.9	10	1	10692	0.94118
50	0.5	0.5	1	-1	0.03	0.04	0.2	0.9	10	1	9001.3	0.96691
50	0.5	0.5	1	-1	0.03	0.04	0.8	0.9	10	1	6235.5	0.99318
50	0.5	0.5	1	-1	0.03	0.04	1.2	0.9	10	1	5405	0.99664
50	0.5	0.5	1	-1	0.03	0.04	1.6	0.9	10	1	4894.8	0.99764
50	0.5	0.5	1	-1	0.03	0.04	2	0.9	10	1	4640	0.99773
50	0.6	0.5	1	-1	0.03	0.04	0.04	0.9	10	1	8458.1	0.98245
50	0.6	0.5	1	-1	0.03	0.04	0.2	0.9	10	1	7572.9	0.98927
50	0.6	0.5	1	-1	0.03	0.04	0.8	0.9	10	1	5974.4	0.99627
50	0.6	0.5	1	-1	0.03	0.04	1.2	0.9	10	1	5385.9	0.99809
50	0.6	0.5	1	-1	0.03	0.04	1.6	0.9	10	1	5161.7	0.99809
50	0.6	0.5	1	-1	0.03	0.04	2	0.9	10	1	4889.6	0.99855
50	0.7	0.5	1	-1	0.03	0.04	0.04	0.9	10	1	6870.1	0.99536
50	0.7	0.5	1	-1	0.03	0.04	0.2	0.9	10	1	6509.3	0.99591
50	0.7	0.5	1	-1	0.03	0.04	0.8	0.9	10	1	5893.2	0.99855
50	0.7	0.5	1	-1	0.03	0.04	1.2	0.9	10	1	5594.9	0.99827
50	0.7	0.5	1	-1	0.03	0.04	1.6	0.9	10	1	5450.7	0.99845
50	0.7	0.5	1	-1	0.03	0.04	2	0.9	10	1	5373.4	0.99891
50	0.8	0.5	1	-1	0.03	0.04	0.04	0.9	10	1	5931.5	0.99891
50	0.8	0.5	1	-1	0.03	0.04	0.2	0.9	10	1	5883.2	0.99818
50	0.8	0.5	1	-1	0.03	0.04	0.8	0.9	10	1	5980.3	0.99845
50	0.8	0.5	1	-1	0.03	0.04	1.2	0.9	10	1	6022.6	0.99945
50	0.8	0.5	1	-1	0.03	0.04	1.6	0.9	10	1	6075.4	0.99891
50	0.8	0.5	1	-1	0.03	0.04	2	0.9	10	1	6185.7	0.99782
50	0.9	0.5	1	-1	0.03	0.04	0.04	0.9	10	1	5044.1	0.99982
50	0.9	0.5	1	-1	0.03	0.04	0.2	0.9	10	1	5335.9	0.99927
50	0.9	0.5	1	-1	0.03	0.04	0.8	0.9	10	1	6424.2	0.99873
50	0.9	0.5	1	-1	0.03	0.04	1.2	0.9	10	1	6864.5	0.99755
50	0.9	0.5	1	-1	0.03	0.04	1.6	0.9	10	1	7380.9	0.99773
50	0.9	0.5	1	-1	0.03	0.04	2	0.9	10	1	7776	0.99764
50	0.99	0.5	1	-1	0.03	0.04	0.04	0.9	10	1	4431	1
50	0.99	0.5	1	-1	0.03	0.04	0.2	0.9	10	1	5333.7	0.99936
50	0.99	0.5	1	-1	0.03	0.04	0.8	0.9	10	1	10957	0.98055
50	0.99	0.5	1	-1	0.03	0.04	1.2	0.9	10	1	16653	0.88882
50	0.99	0.5	1	-1	0.03	0.04	1.6	0.9	10	1	20708	0.63773
50	0.99	0.5	1	-1	0.03	0.04	2	0.9	10	1	17756	0.29118
50	0.01	0.6	1	-1	0.03	0.04	0.04	0.1	10	1	7852.2	0.098091
50	0.01	0.6	1	-1	0.03	0.04	0.2	0.1	10	1	8084.4	0.11709
50	0.01	0.6	1	-1	0.03	0.04	0.8	0.1	10	1	8684	0.17336
50	0.01	0.6	1	-1	0.03	0.04	1.2	0.1	10	1	9014.4	0.2138
50	0.01	0.6	1	-1	0.03	0.04	1.6	0.1	10	1	9123.7	0.24409
50	0.01	0.6	1	-1	0.03	0.04	2	0.1	10	1	9298	0.28336
50	0.1	0.6	1	-1	0.03	0.04	0.04	0.1	10	1	10302	0.19882
50	0.1	0.6	1	-1	0.03	0.04	0.2	0.1	10	1	11735	0.31736
50	0.1	0.6	1	-1	0.03	0.04	0.8	0.1	10	1	11245	0.74573
50	0.1	0.6	1	-1	0.03	0.04	1.2	0.1	10	1	9479.4	0.86564
50	0.1	0.6	1	-1	0.03	0.04	1.6	0.1	10	1	8009.7	0.91891
50	0.1	0.6	1	-1	0.03	0.04	2	0.1	10	1	7127.8	0.94882
50	0.2	0.6	1	-1	0.03	0.04	0.04	0.1	10	1	12074	0.24409
50	0.2	0.6	1	-1	0.03	0.04	0.2	0.1	10	1	13351	0.42927
50	0.2	0.6	1	-1	0.03	0.04	0.8	0.1	10	1	10164	0.87336
50	0.2	0.6	1	-1	0.03	0.04	1.2	0.1	10	1	7992.7	0.94964
50	0.2	0.6	1	-1	0.03	0.04	1.6	0.1	10	1	6697.7	0.97282
50	0.2	0.6	1	-1	0.03	0.04	2	0.1	10	1	5747.9	0.98336
50	0.3	0.6	1	-1	0.03	0.04	0.04	0.1	10	1	13801	0.29145
50	0.3	0.6	1	-1	0.03	0.04	0.2	0.1	10	1	15067	0.48955
50	0.3	0.6	1	-1	0.03	0.04	0.8	0.1	10	1	10144	0.91682
50	0.3	0.6	1	-1	0.03	0.04	1.2	0.1	10	1	7820.8	0.96791
50	0.3	0.6	1	-1	0.03	0.04	1.6	0.1	10	1	6384.6	0.98436
50	0.3	0.6	1	-1	0.03	0.04	2	0.1	10	1	5511.1	0.991
50	0.4	0.6	1	-1	0.03	0.04	0.04	0.1	10	1	15652	0.31727
50	0.4	0.6	1	-1	0.03	0.04	0.2	0.1	10	1	16738	0.53291
50	0.4	0.6	1	-1	0.03	0.04	0.8	0.1	10	1	10838	0.92855
50	0.4	0.6	1	-1	0.03	0.04	1.2	0.1	10	1	8122.4	0.97273
50	0.4	0.6	1	-1	0.03	0.04	1.6	0.1	10	1	6730.3	0.98818
50	0.4	0.6	1	-1	0.03	0.04	2	0.1	10	1	5846.4	0.99445
50	0.5	0.6	1	-1	0.03	0.04	0.04	0.1	10	1	17697	0.33218
50	0.5	0.6	1	-1	0.03	0.04	0.2	0.1	10	1	18179	0.55955
50	0.5	0.6	1	-1	0.03	0.04	0.8	0.1	10	1	11944	0.93136
50	0.5	0.6	1	-1	0.03	0.04	1.2	0.1	10	1	8894.7	0.97391
50	0.5	0.6	1	-1	0.03	0.04	1.6	0.1	10	1	7375.7	0.98845
50	0.5	0.6	1	-1	0.03	0.04	2	0.1	10	1	6479.7	0.99245
50	0.6	0.6	1	-1	0.03	0.04	0.04	0.1	10	1	20001	0.36191
50	0.6	0.6	1	-1	0.03	0.04	0.2	0.1	10	1	20676	0.56782
50	0.6	0.6	1	-1	0.03	0.04	0.8	0.1	10	1	13799	0.92773
50	0.6	0.6	1	-1	0.03	0.04	1.2	0.1	10	1	10447	0.97309
50	0.6	0.6	1	-1	0.03	0.04	1.6	0.1	10	1	8684.3	0.98682
50	0.6	0.6	1	-1	0.03	0.04	2	0.1	10	1	7705.1	0.99336
50	0.7	0.6	1	-1	0.03	0.04	0.04	0.1	10	1	22356	0.37745
50	0.7	0.6	1	-1	0.03	0.04	0.2	0.1	10	1	22951	0.55118
50	0.7	0.6	1	-1	0.03	0.04	0.8	0.1	10	1	16360	0.90373
50	0.7	0.6	1	-1	0.03	0.04	1.2	0.1	10	1	12775	0.96445
50	0.7	0.6	1	-1	0.03	0.04	1.6	0.1	10	1	10795	0.98282
50	0.7	0.6	1	-1	0.03	0.04	2	0.1	10	1	9403.9	0.98927
50	0.8	0.6	1	-1	0.03	0.04	0.04	0.1	10	1	25306	0.40627
50	0.8	0.6	1	-1	0.03	0.04	0.2	0.1	10	1	25660	0.54545
50	0.8	0.6	1	-1	0.03	0.04	0.8	0.1	10	1	20596	0.86427
50	0.8	0.6	1	-1	0.03	0.04	1.2	0.1	10	1	16809	0.93145
50	0.8	0.6	1	-1	0.03	0.04	1.6	0.1	10	1	14310	0.96473
50	0.8	0.6	1	-1	0.03	0.04	2	0.1	10	1	12787	0.97818
50	0.9	0.6	1	-1	0.03	0.04	0.04	0.1	10	1	28341	0.41036
50	0.9	0.6	1	-1	0.03	0.04	0.2	0.1	10	1	28391	0.49964
50	0.9	0.6	1	-1	0.03	0.04	0.8	0.1	10	1	27251	0.72936
50	0.9	0.6	1	-1	0.03	0.04	1.2	0.1	10	1	24097	0.815
50	0.9	0.6	1	-1	0.03	0.04	1.6	0.1	10	1	22823	0.86691
50	0.9	0.6	1	-1	0.03	0.04	2	0.1	10	1	20979	0.89836
50	0.99	0.6	1	-1	0.03	0.04	0.04	0.1	10	1	31560	0.40409
50	0.99	0.6	1	-1	0.03	0.04	0.2	0.1	10	1	28385	0.28664
50	0.99	0.6	1	-1	0.03	0.04	0.8	0.1	10	1	17068	0.054636
50	0.99	0.6	1	-1	0.03	0.04	1.2	0.1	10	1	11838	0.020182
50	0.99	0.6	1	-1	0.03	0.04	1.6	0.1	10	1	8863	0.007
50	0.99	0.6	1	-1	0.03	0.04	2	0.1	10	1	6947.9	0.003
50	0.01	0.6	1	-1	0.03	0.04	0.04	0.5	10	1	1518.2	0
50	0.01	0.6	1	-1	0.03	0.04	0.2	0.5	10	1	1578.8	0
50	0.01	0.6	1	-1	0.03	0.04	0.8	0.5	10	1	1871.6	0.00063636
50	0.01	0.6	1	-1	0.03	0.04	1.2	0.5	10	1	2153.6	0.0018182
50	0.01	0.6	1	-1	0.03	0.04	1.6	0.5	10	1	2404	0.0046364
50	0.01	0.6	1	-1	0.03	0.04	2	0.5	10	1	2711.2	0.0084545
50	0.1	0.6	1	-1	0.03	0.04	0.04	0.5	10	1	4050.8	0.0090909
50	0.1	0.6	1	-1	0.03	0.04	0.2	0.5	10	1	5404	0.027
50	0.1	0.6	1	-1	0.03	0.04	0.8	0.5	10	1	11470	0.35527
50	0.1	0.6	1	-1	0.03	0.04	1.2	0.5	10	1	11472	0.64118
50	0.1	0.6	1	-1	0.03	0.04	1.6	0.5	10	1	10187	0.79945
50	0.1	0.6	1	-1	0.03	0.04	2	0.5	10	1	8721.4	0.88009
50	0.2	0.6	1	-1	0.03	0.04	0.04	0.5	10	1	7430	0.052182
50	0.2	0.6	1	-1	0.03	0.04	0.2	0.5	10	1	10261	0.16009
50	0.2	0.6	1	-1	0.03	0.04	0.8	0.5	10	1	11759	0.79191
50	0.2	0.6	1	-1	0.03	0.04	1.2	0.5	10	1	9015.9	0.91655
50	0.2	0.6	1	-1	0.03	0.04	1.6	0.5	10	1	7254.9	0.96109
50	0.2	0.6	1	-1	0.03	0.04	2	0.5	10	1	6242.8	0.97582
50	0.3	0.6	1	-1	0.03	0.04	0.04	0.5	10	1	11477	0.15773
50	0.3	0.6	1	-1	0.03	0.04	0.2	0.5	10	1	14447	0.36682
50	0.3	0.6	1	-1	0.03	0.04	0.8	0.5	10	1	10520	0.90545
50	0.3	0.6	1	-1	0.03	0.04	1.2	0.5	10	1	7816.5	0.96255
50	0.3	0.6	1	-1	0.03	0.04	1.6	0.5	10	1	6413.6	0.98527
50	0.3	0.6	1	-1	0.03	0.04	2	0.5	10	1	5534.3	0.99018
50	0.4	0.6	1	-1	0.03	0.04	0.04	0.5	10	1	15269	0.31191
50	0.4	0.6	1	-1	0.03	0.04	0.2	0.5	10	1	16444	0.57027
50	0.4	0.6	1	-1	0.03	0.04	0.8	0.5	10	1	9832.7	0.95164
50	0.4	0.6	1	-1	0.03	0.04	1.2	0.5	10	1	7495.1	0.98118
50	0.4	0.6	1	-1	0.03	0.04	1.6	0.5	10	1	6246.9	0.99155
50	0.4	0.6	1	-1	0.03	0.04	2	0.5	10	1	5542.6	0.99555
50	0.5	0.6	1	-1	0.03	0.04	0.04	0.5	10	1	18503	0.48782
50	0.5	0.6	1	-1	0.03	0.04	0.2	0.5	10	1	17168	0.71464
50	0.5	0.6	1	-1	0.03	0.04	0.8	0.5	10	1	9847.8	0.96964
50	0.5	0.6	1	-1	0.03	0.04	1.2	0.5	10	1	7605.9	0.98709
50	0.5	0.6	1	-1	0.03	0.04	1.6	0.5	10	1	6488	0.99536
50	0.5	0.6	1	-1	0.03	0.04	2	0.5	10	1	5757	0.99618
50	0.6	0.6	1	-1	0.03	0.04	0.04	0.5	10	1	20252	0.65036
50	0.6	0.6	1	-1	0.03	0.04	0.2	0.5	10	1	17532	0.81227
50	0.6	0.6	1	-1	0.03	0.04	0.8	0.5	10	1	10248	0.97318
50	0.6	0.6	1	-1	0.03	0.04	1.2	0.5	10	1	8190.2	0.991
50	0.6	0.6	1	-1	0.03	0.04	1.6	0.5	10	1	7096	0.99445
50	0.6	0.6	1	-1	0.03	0.04	2	0.5	10	1	6398.1	0.9964
50	0.7	0.6	1	-1	0.03	0.04	0.04	0.5	10	1	20361	0.77091
50	0.7	0.6	1	-1	0.03	0.04	0.2	0.5	10	1	17490	0.88018
50	0.7	0.6	1	-1	0.03	0.04	0.8	0.5	10	1	11142	0.97591
50	0.7	0.6	1	-1	0.03	0.04	1.2	0.5	10	1	9357.6	0.99036
50	0.7	0.6	1	-1	0.03	0.04	1.6	0.5	10	1	8151.5	0.995
50	0.7	0.6	1	-1	0.03	0.04	2	0.5	10	1	7437.2	0.997
50	0.8	0.6	1	-1	0.03	0.04	0.04	0.5	10	1	19893	0.86191
50	0.8	0.6	1	-1	0.03	0.04	0.2	0.5	10	1	17847	0.91473
50	0.8	0.6	1	-1	0.03	0.04	0.8	0.5	10	1	12610	0.97582
50	0.8	0.6	1	-1	0.03	0.04	1.2	0.5	10	1	10857	0.98591
50	0.8	0.6	1	-1	0.03	0.04	1.6	0.5	10	1	10078	0.99082
50	0.8	0.6	1	-1	0.03	0.04	2	0.5	10	1	9302.4	0.99445
50	0.9	0.6	1	-1	0.03	0.04	0.04	0.5	10	1	18823	0.92382
50	0.9	0.6	1	-1	0.03	0.04	0.2	0.5	10	1	17633	0.93655
50	0.9	0.6	1	-1	0.03	0.04	0.8	0.5	10	1	15724	0.96473
50	0.9	0.6	1	-1	0.03	0.04	1.2	0.5	10	1	14651	0.97245
50	0.9	0.6	1	-1	0.03	0.04	1.6	0.5	10	1	14119	0.97518
50	0.9	0.6	1	-1	0.03	0.04	2	0.5	10	1	13421	0.98073
50	0.99	0.6	1	-1	0.03	0.04	0.04	0.5	10	1	17134	0.96273
50	0.99	0.6	1	-1	0.03	0.04	0.2	0.5	10	1	20176	0.92227
50	0.99	0.6	1	-1	0.03	0.04	0.8	0.5	10	1	28561	0.52155
50	0.99	0.6	1	-1	0.03	0.04	1.2	0.5	10	1	23533	0.22491
50	0.99	0.6	1	-1	0.03	0.04	1.6	0.5	10	1	16214	0.079091
50	0.99	0.6	1	-1	0.03	0.04	2	0.5	10	1	11020	0.028455
50	0.01	0.6	1	-1	0.03	0.04	0.04	0.9	10	1	370.41	0
50	0.01	0.6	1	-1	0.03	0.04	0.2	0.9	10	1	384.56	0
50	0.01	0.6	1	-1	0.03	0.04	0.8	0.9	10	1	453.18	0
50	0.01	0.6	1	-1	0.03	0.04	1.2	0.9	10	1	506.16	0
50	0.01	0.6	1	-1	0.03	0.04	1.6	0.9	10	1	579.09	0
50	0.01	0.6	1	-1	0.03	0.04	2	0.9	10	1	664.02	0
50	0.1	0.6	1	-1	0.03	0.04	0.04	0.9	10	1	1042.5	9.09E-05
50	0.1	0.6	1	-1	0.03	0.04	0.2	0.9	10	1	1310.1	9.09E-05
50	0.1	0.6	1	-1	0.03	0.04	0.8	0.9	10	1	4323.1	0.031545
50	0.1	0.6	1	-1	0.03	0.04	1.2	0.9	10	1	8545.5	0.20945
50	0.1	0.6	1	-1	0.03	0.04	1.6	0.9	10	1	10593	0.50109
50	0.1	0.6	1	-1	0.03	0.04	2	0.9	10	1	10022	0.68964
50	0.2	0.6	1	-1	0.03	0.04	0.04	0.9	10	1	2692.7	0.0017273
50	0.2	0.6	1	-1	0.03	0.04	0.2	0.9	10	1	4342.5	0.015091
50	0.2	0.6	1	-1	0.03	0.04	0.8	0.9	10	1	12730	0.58882
50	0.2	0.6	1	-1	0.03	0.04	1.2	0.9	10	1	10216	0.84309
50	0.2	0.6	1	-1	0.03	0.04	1.6	0.9	10	1	8109.2	0.92436
50	0.2	0.6	1	-1	0.03	0.04	2	0.9	10	1	6871.6	0.95891
50	0.3	0.6	1	-1	0.03	0.04	0.04	0.9	10	1	7063	0.048091
50	0.3	0.6	1	-1	0.03	0.04	0.2	0.9	10	1	11693	0.21091
50	0.3	0.6	1	-1	0.03	0.04	0.8	0.9	10	1	10848	0.888
50	0.3	0.6	1	-1	0.03	0.04	1.2	0.9	10	1	7924.5	0.96145
50	0.3	0.6	1	-1	0.03	0.04	1.6	0.9	10	1	6438.1	0.98236
50	0.3	0.6	1	-1	0.03	0.04	2	0.9	10	1	5602.2	0.989
50	0.4	0.6	1	-1	0.03	0.04	0.04	0.9	10	1	14869	0.30164
50	0.4	0.6	1	-1	0.03	0.04	0.2	0.9	10	1	15908	0.628
50	0.4	0.6	1	-1	0.03	0.04	0.8	0.9	10	1	9034.1	0.96118
50	0.4	0.6	1	-1	0.03	0.04	1.2	0.9	10	1	6954.3	0.98618
50	0.4	0.6	1	-1	0.03	0.04	1.6	0.9	10	1	5795.7	0.99245
50	0.4	0.6	1	-1	0.03	0.04	2	0.9	10	1	5116.5	0.99591
50	0.5	0.6	1	-1	0.03	0.04	0.04	0.9	10	1	17610	0.70809
50	0.5	0.6	1	-1	0.03	0.04	0.2	0.9	10	1	14524	0.86573
50	0.5	0.6	1	-1	0.03	0.04	0.8	0.9	10	1	8084.7	0.98373
50	0.5	0.6	1	-1	0.03	0.04	1.2	0.9	10	1	6561.7	0.99227
50	0.5	0.6	1	-1	0.03	0.04	1.6	0.9	10	1	5730.5	0.99673
50	0.5	0.6	1	-1	0.03	0.04	2	0.9	10	1	5181.2	0.99827
50	0.6	0.6	1	-1	0.03	0.04	0.04	0.9	10	1	14869	0.90227
50	0.6	0.6	1	-1	0.03	0.04	0.2	0.9	10	1	12167	0.95436
50	0.6	0.6	1	-1	0.03	0.04	0.8	0.9	10	1	7688.4	0.99282
50	0.6	0.6	1	-1	0.03	0.04	1.2	0.9	10	1	6478.4	0.99655
50	0.6	0.6	1	-1	0.03	0.04	1.6	0.9	10	1	5884.8	0.99809
50	0.6	0.6	1	-1	0.03	0.04	2	0.9	10	1	5385.4	0.99855
50	0.7	0.6	1	-1	0.03	0.04	0.04	0.9	10	1	11900	0.96773
50	0.7	0.6	1	-1	0.03	0.04	0.2	0.9	10	1	10179	0.98373
50	0.7	0.6	1	-1	0.03	0.04	0.8	0.9	10	1	7689.7	0.99609
50	0.7	0.6	1	-1	0.03	0.04	1.2	0.9	10	1	6865	0.99673
50	0.7	0.6	1	-1	0.03	0.04	1.6	0.9	10	1	6440.5	0.99809
50	0.7	0.6	1	-1	0.03	0.04	2	0.9	10	1	6087.8	0.99909
50	0.8	0.6	1	-1	0.03	0.04	0.04	0.9	10	1	9699.2	0.99218
50	0.8	0.6	1	-1	0.03	0.04	0.2	0.9	10	1	9076.3	0.99355
50	0.8	0.6	1	-1	0.03	0.04	0.8	0.9	10	1	7813.2	0.99755
50	0.8	0.6	1	-1	0.03	0.04	1.2	0.9	10	1	7444.9	0.99836
50	0.8	0.6	1	-1	0.03	0.04	1.6	0.9	10	1	7243.9	0.999
50	0.8	0.6	1	-1	0.03	0.04	2	0.9	10	1	7058.3	0.99836
50	0.9	0.6	1	-1	0.03	0.04	0.04	0.9	10	1	7928	0.99745
50	0.9	0.6	1	-1	0.03	0.04	0.2	0.9	10	1	8085.5	0.99773
50	0.9	0.6	1	-1	0.03	0.04	0.8	0.9	10	1	8570.6	0.99745
50	0.9	0.6	1	-1	0.03	0.04	1.2	0.9	10	1	8689.3	0.99773
50	0.9	0.6	1	-1	0.03	0.04	1.6	0.9	10	1	8892.6	0.99718
50	0.9	0.6	1	-1	0.03	0.04	2	0.9	10	1	9034.2	0.997
50	0.99	0.6	1	-1	0.03	0.04	0.04	0.9	10	1	6744.3	0.99991
50	0.99	0.6	1	-1	0.03	0.04	0.2	0.9	10	1	8034.8	0.99891
50	0.99	0.6	1	-1	0.03	0.04	0.8	0.9	10	1	15292	0.96882
50	0.99	0.6	1	-1	0.03	0.04	1.2	0.9	10	1	22022	0.86482
50	0.99	0.6	1	-1	0.03	0.04	1.6	0.9	10	1	25295	0.60236
50	0.99	0.6	1	-1	0.03	0.04	2	0.9	10	1	22737	0.31045
50	0.01	0.7	1	-1	0.03	0.04	0.04	0.1	10	1	7797.7	0.085545
50	0.01	0.7	1	-1	0.03	0.04	0.2	0.1	10	1	8039.4	0.098273
50	0.01	0.7	1	-1	0.03	0.04	0.8	0.1	10	1	8458.3	0.14873
50	0.01	0.7	1	-1	0.03	0.04	1.2	0.1	10	1	8727.9	0.17655
50	0.01	0.7	1	-1	0.03	0.04	1.6	0.1	10	1	8910.1	0.20718
50	0.01	0.7	1	-1	0.03	0.04	2	0.1	10	1	9066.5	0.23391
50	0.1	0.7	1	-1	0.03	0.04	0.04	0.1	10	1	10252	0.17164
50	0.1	0.7	1	-1	0.03	0.04	0.2	0.1	10	1	12008	0.29609
50	0.1	0.7	1	-1	0.03	0.04	0.8	0.1	10	1	11543	0.74245
50	0.1	0.7	1	-1	0.03	0.04	1.2	0.1	10	1	9892.9	0.86918
50	0.1	0.7	1	-1	0.03	0.04	1.6	0.1	10	1	8240.4	0.931
50	0.1	0.7	1	-1	0.03	0.04	2	0.1	10	1	7123	0.94827
50	0.2	0.7	1	-1	0.03	0.04	0.04	0.1	10	1	12344	0.21845
50	0.2	0.7	1	-1	0.03	0.04	0.2	0.1	10	1	14029	0.40609
50	0.2	0.7	1	-1	0.03	0.04	0.8	0.1	10	1	10566	0.88418
50	0.2	0.7	1	-1	0.03	0.04	1.2	0.1	10	1	8036.6	0.95627
50	0.2	0.7	1	-1	0.03	0.04	1.6	0.1	10	1	6432.3	0.97755
50	0.2	0.7	1	-1	0.03	0.04	2	0.1	10	1	5553.8	0.98855
50	0.3	0.7	1	-1	0.03	0.04	0.04	0.1	10	1	14368	0.24555
50	0.3	0.7	1	-1	0.03	0.04	0.2	0.1	10	1	15869	0.47118
50	0.3	0.7	1	-1	0.03	0.04	0.8	0.1	10	1	10547	0.92655
50	0.3	0.7	1	-1	0.03	0.04	1.2	0.1	10	1	7622.5	0.97691
50	0.3	0.7	1	-1	0.03	0.04	1.6	0.1	10	1	6214.2	0.98845
50	0.3	0.7	1	-1	0.03	0.04	2	0.1	10	1	5364.2	0.99445
50	0.4	0.7	1	-1	0.03	0.04	0.04	0.1	10	1	16477	0.288
50	0.4	0.7	1	-1	0.03	0.04	0.2	0.1	10	1	17874	0.52291
50	0.4	0.7	1	-1	0.03	0.04	0.8	0.1	10	1	10898	0.939
50	0.4	0.7	1	-1	0.03	0.04	1.2	0.1	10	1	7966.4	0.98291
50	0.4	0.7	1	-1	0.03	0.04	1.6	0.1	10	1	6421	0.99155
50	0.4	0.7	1	-1	0.03	0.04	2	0.1	10	1	5525.4	0.99609
50	0.5	0.7	1	-1	0.03	0.04	0.04	0.1	10	1	18649	0.304
50	0.5	0.7	1	-1	0.03	0.04	0.2	0.1	10	1	19915	0.54355
50	0.5	0.7	1	-1	0.03	0.04	0.8	0.1	10	1	11960	0.94645
50	0.5	0.7	1	-1	0.03	0.04	1.2	0.1	10	1	8883.2	0.98345
50	0.5	0.7	1	-1	0.03	0.04	1.6	0.1	10	1	7127.1	0.99336
50	0.5	0.7	1	-1	0.03	0.04	2	0.1	10	1	6117.3	0.99682
50	0.6	0.7	1	-1	0.03	0.04	0.04	0.1	10	1	21999	0.33245
50	0.6	0.7	1	-1	0.03	0.04	0.2	0.1	10	1	23021	0.55682
50	0.6	0.7	1	-1	0.03	0.04	0.8	0.1	10	1	13861	0.945
50	0.6	0.7	1	-1	0.03	0.04	1.2	0.1	10	1	10390	0.98182
50	0.6	0.7	1	-1	0.03	0.04	1.6	0.1	10	1	8375.6	0.99218
50	0.6	0.7	1	-1	0.03	0.04	2	0.1	10	1	7201	0.99582
50	0.7	0.7	1	-1	0.03	0.04	0.04	0.1	10	1	26052	0.35673
50	0.7	0.7	1	-1	0.03	0.04	0.2	0.1	10	1	26549	0.55355
50	0.7	0.7	1	-1	0.03	0.04	0.8	0.1	10	1	16901	0.936
50	0.7	0.7	1	-1	0.03	0.04	1.2	0.1	10	1	12800	0.97773
50	0.7	0.7	1	-1	0.03	0.04	1.6	0.1	10	1	10431	0.99018
50	0.7	0.7	1	-1	0.03	0.04	2	0.1	10	1	8915.2	0.99473
50	0.8	0.7	1	-1	0.03	0.04	0.04	0.1	10	1	30060	0.37245
50	0.8	0.7	1	-1	0.03	0.04	0.2	0.1	10	1	30341	0.54736
50	0.8	0.7	1	-1	0.03	0.04	0.8	0.1	10	1	21872	0.90191
50	0.8	0.7	1	-1	0.03	0.04	1.2	0.1	10	1	17001	0.96073
50	0.8	0.7	1	-1	0.03	0.04	1.6	0.1	10	1	14004	0.98255
50	0.8	0.7	1	-1	0.03	0.04	2	0.1	10	1	12371	0.98827
50	0.9	0.7	1	-1	0.03	0.04	0.04	0.1	10	1	34998	0.38636
50	0.9	0.7	1	-1	0.03	0.04	0.2	0.1	10	1	35734	0.494
50	0.9	0.7	1	-1	0.03	0.04	0.8	0.1	10	1	31321	0.792
50	0.9	0.7	1	-1	0.03	0.04	1.2	0.1	10	1	27103	0.88336
50	0.9	0.7	1	-1	0.03	0.04	1.6	0.1	10	1	23930	0.926
50	0.9	0.7	1	-1	0.03	0.04	2	0.1	10	1	20721	0.94991
50	0.99	0.7	1	-1	0.03	0.04	0.04	0.1	10	1	41161	0.38736
50	0.99	0.7	1	-1	0.03	0.04	0.2	0.1	10	1	38469	0.28609
50	0.99	0.7	1	-1	0.03	0.04	0.8	0.1	10	1	24635	0.076
50	0.99	0.7	1	-1	0.03	0.04	1.2	0.1	10	1	18474	0.032727
50	0.99	0.7	1	-1	0.03	0.04	1.6	0.1	10	1	14080	0.014727
50	0.99	0.7	1	-1	0.03	0.04	2	0.1	10	1	11074	0.0069091
50	0.01	0.7	1	-1	0.03	0.04	0.04	0.5	10	1	1371.5	0
50	0.01	0.7	1	-1	0.03	0.04	0.2	0.5	10	1	1410.2	0
50	0.01	0.7	1	-1	0.03	0.04	0.8	0.5	10	1	1616	0.00018182
50	0.01	0.7	1	-1	0.03	0.04	1.2	0.5	10	1	1804.8	0.00072727
50	0.01	0.7	1	-1	0.03	0.04	1.6	0.5	10	1	2037.3	0.0024545
50	0.01	0.7	1	-1	0.03	0.04	2	0.5	10	1	2234.3	0.0034545
50	0.1	0.7	1	-1	0.03	0.04	0.04	0.5	10	1	3304.6	0.0030909
50	0.1	0.7	1	-1	0.03	0.04	0.2	0.5	10	1	4227.9	0.010545
50	0.1	0.7	1	-1	0.03	0.04	0.8	0.5	10	1	10518	0.21655
50	0.1	0.7	1	-1	0.03	0.04	1.2	0.5	10	1	12222	0.52773
50	0.1	0.7	1	-1	0.03	0.04	1.6	0.5	10	1	11153	0.73791
50	0.1	0.7	1	-1	0.03	0.04	2	0.5	10	1	9553	0.85
50	0.2	0.7	1	-1	0.03	0.04	0.04	0.5	10	1	5855.2	0.021091
50	0.2	0.7	1	-1	0.03	0.04	0.2	0.5	10	1	8387.6	0.07
50	0.2	0.7	1	-1	0.03	0.04	0.8	0.5	10	1	13457	0.68518
50	0.2	0.7	1	-1	0.03	0.04	1.2	0.5	10	1	10303	0.89318
50	0.2	0.7	1	-1	0.03	0.04	1.6	0.5	10	1	8027.4	0.95182
50	0.2	0.7	1	-1	0.03	0.04	2	0.5	10	1	6598.9	0.97155
50	0.3	0.7	1	-1	0.03	0.04	0.04	0.5	10	1	9119.9	0.063636
50	0.3	0.7	1	-1	0.03	0.04	0.2	0.5	10	1	12944	0.19382
50	0.3	0.7	1	-1	0.03	0.04	0.8	0.5	10	1	12082	0.86555
50	0.3	0.7	1	-1	0.03	0.04	1.2	0.5	10	1	8711.3	0.96136
50	0.3	0.7	1	-1	0.03	0.04	1.6	0.5	10	1	6885.3	0.983
50	0.3	0.7	1	-1	0.03	0.04	2	0.5	10	1	5821.8	0.99136
50	0.4	0.7	1	-1	0.03	0.04	0.04	0.5	10	1	13112	0.14164
50	0.4	0.7	1	-1	0.03	0.04	0.2	0.5	10	1	17193	0.38382
50	0.4	0.7	1	-1	0.03	0.04	0.8	0.5	10	1	11344	0.92982
50	0.4	0.7	1	-1	0.03	0.04	1.2	0.5	10	1	8282.5	0.97845
50	0.4	0.7	1	-1	0.03	0.04	1.6	0.5	10	1	6497.9	0.99209
50	0.4	0.7	1	-1	0.03	0.04	2	0.5	10	1	5566.6	0.99509
50	0.5	0.7	1	-1	0.03	0.04	0.04	0.5	10	1	18111	0.27509
50	0.5	0.7	1	-1	0.03	0.04	0.2	0.5	10	1	20216	0.53836
50	0.5	0.7	1	-1	0.03	0.04	0.8	0.5	10	1	11466	0.95764
50	0.5	0.7	1	-1	0.03	0.04	1.2	0.5	10	1	8377.1	0.98745
50	0.5	0.7	1	-1	0.03	0.04	1.6	0.5	10	1	6823.1	0.9934
50	0.5	0.7	1	-1	0.03	0.04	2	0.5	10	1	5821	0.996
50	0.6	0.7	1	-1	0.03	0.04	0.04	0.5	10	1	22539	0.417
50	0.6	0.7	1	-1	0.03	0.04	0.2	0.5	10	1	22613	0.68227
50	0.6	0.7	1	-1	0.03	0.04	0.8	0.5	10	1	12029	0.96991
50	0.6	0.7	1	-1	0.03	0.04	1.2	0.5	10	1	9117.9	0.99009
50	0.6	0.7	1	-1	0.03	0.04	1.6	0.5	10	1	7495.8	0.99618
50	0.6	0.7	1	-1	0.03	0.04	2	0.5	10	1	6526.7	0.99773
50	0.7	0.7	1	-1	0.03	0.04	0.04	0.5	10	1	25999	0.58709
50	0.7	0.7	1	-1	0.03	0.04	0.2	0.5	10	1	23229	0.77727
50	0.7	0.7	1	-1	0.03	0.04	0.8	0.5	10	1	13322	0.97427
50	0.7	0.7	1	-1	0.03	0.04	1.2	0.5	10	1	10447	0.99091
50	0.7	0.7	1	-1	0.03	0.04	1.6	0.5	10	1	8686.8	0.99409
50	0.7	0.7	1	-1	0.03	0.04	2	0.5	10	1	7792.9	0.9973
50	0.8	0.7	1	-1	0.03	0.04	0.04	0.5	10	1	28109	0.73818
50	0.8	0.7	1	-1	0.03	0.04	0.2	0.5	10	1	24509	0.84464
50	0.8	0.7	1	-1	0.03	0.04	0.8	0.5	10	1	15380	0.97509
50	0.8	0.7	1	-1	0.03	0.04	1.2	0.5	10	1	12562	0.98782
50	0.8	0.7	1	-1	0.03	0.04	1.6	0.5	10	1	10927	0.99236
50	0.8	0.7	1	-1	0.03	0.04	2	0.5	10	1	9963.1	0.996
50	0.9	0.7	1	-1	0.03	0.04	0.04	0.5	10	1	28411	0.85
50	0.9	0.7	1	-1	0.03	0.04	0.2	0.5	10	1	26218	0.89
50	0.9	0.7	1	-1	0.03	0.04	0.8	0.5	10	1	19756	0.96245
50	0.9	0.7	1	-1	0.03	0.04	1.2	0.5	10	1	17624	0.97536
50	0.9	0.7	1	-1	0.03	0.04	1.6	0.5	10	1	16043	0.98236
50	0.9	0.7	1	-1	0.03	0.04	2	0.5	10	1	14958	0.98791
50	0.99	0.7	1	-1	0.03	0.04	0.04	0.5	10	1	26632	0.92618
50	0.99	0.7	1	-1	0.03	0.04	0.2	0.5	10	1	30903	0.88018
50	0.99	0.7	1	-1	0.03	0.04	0.8	0.5	10	1	37871	0.50445
50	0.99	0.7	1	-1	0.03	0.04	1.2	0.5	10	1	33103	0.25591
50	0.99	0.7	1	-1	0.03	0.04	1.6	0.5	10	1	24178	0.11073
50	0.99	0.7	1	-1	0.03	0.04	2	0.5	10	1	17907	0.046455
50	0.01	0.7	1	-1	0.03	0.04	0.04	0.9	10	1	349.64	0
50	0.01	0.7	1	-1	0.03	0.04	0.2	0.9	10	1	361.4	0
50	0.01	0.7	1	-1	0.03	0.04	0.8	0.9	10	1	418.6	0
50	0.01	0.7	1	-1	0.03	0.04	1.2	0.9	10	1	465.82	0
50	0.01	0.7	1	-1	0.03	0.04	1.6	0.9	10	1	521.07	0
50	0.01	0.7	1	-1	0.03	0.04	2	0.9	10	1	579.76	0
50	0.1	0.7	1	-1	0.03	0.04	0.04	0.9	10	1	849.39	0
50	0.1	0.7	1	-1	0.03	0.04	0.2	0.9	10	1	1019.9	0
50	0.1	0.7	1	-1	0.03	0.04	0.8	0.9	10	1	2767.7	0.0046364
50	0.1	0.7	1	-1	0.03	0.04	1.2	0.9	10	1	5836.8	0.057727
50	0.1	0.7	1	-1	0.03	0.04	1.6	0.9	10	1	9990.4	0.27473
50	0.1	0.7	1	-1	0.03	0.04	2	0.9	10	1	11158	0.539
50	0.2	0.7	1	-1	0.03	0.04	0.04	0.9	10	1	1775	0.00027273
50	0.2	0.7	1	-1	0.03	0.04	0.2	0.9	10	1	2620.4	0.0012727
50	0.2	0.7	1	-1	0.03	0.04	0.8	0.9	10	1	11732	0.27218
50	0.2	0.7	1	-1	0.03	0.04	1.2	0.9	10	1	12612	0.70027
50	0.2	0.7	1	-1	0.03	0.04	1.6	0.9	10	1	9964.3	0.87618
50	0.2	0.7	1	-1	0.03	0.04	2	0.9	10	1	8084	0.93973
50	0.3	0.7	1	-1	0.03	0.04	0.04	0.9	10	1	3734.1	0.0036364
50	0.3	0.7	1	-1	0.03	0.04	0.2	0.9	10	1	6440.5	0.026909
50	0.3	0.7	1	-1	0.03	0.04	0.8	0.9	10	1	13944	0.74227
50	0.3	0.7	1	-1	0.03	0.04	1.2	0.9	10	1	10164	0.92527
50	0.3	0.7	1	-1	0.03	0.04	1.6	0.9	10	1	7654.1	0.97073
50	0.3	0.7	1	-1	0.03	0.04	2	0.9	10	1	6349.4	0.985
50	0.4	0.7	1	-1	0.03	0.04	0.04	0.9	10	1	8051.9	0.039909
50	0.4	0.7	1	-1	0.03	0.04	0.2	0.9	10	1	13794	0.19391
50	0.4	0.7	1	-1	0.03	0.04	0.8	0.9	10	1	12245	0.91136
50	0.4	0.7	1	-1	0.03	0.04	1.2	0.9	10	1	8623.9	0.97482
50	0.4	0.7	1	-1	0.03	0.04	1.6	0.9	10	1	6832.9	0.99109
50	0.4	0.7	1	-1	0.03	0.04	2	0.9	10	1	5727.9	0.99373
50	0.5	0.7	1	-1	0.03	0.04	0.04	0.9	10	1	15900	0.20655
50	0.5	0.7	1	-1	0.03	0.04	0.2	0.9	10	1	19555	0.52736
50	0.5	0.7	1	-1	0.03	0.04	0.8	0.9	10	1	10946	0.96555
50	0.5	0.7	1	-1	0.03	0.04	1.2	0.9	10	1	8017	0.98727
50	0.5	0.7	1	-1	0.03	0.04	1.6	0.9	10	1	6553.4	0.99464
50	0.5	0.7	1	-1	0.03	0.04	2	0.9	10	1	5759.5	0.99736
50	0.6	0.7	1	-1	0.03	0.04	0.04	0.9	10	1	22403	0.55482
50	0.6	0.7	1	-1	0.03	0.04	0.2	0.9	10	1	20258	0.80991
50	0.6	0.7	1	-1	0.03	0.04	0.8	0.9	10	1	10321	0.98309
50	0.6	0.7	1	-1	0.03	0.04	1.2	0.9	10	1	8030.7	0.99491
50	0.6	0.7	1	-1	0.03	0.04	1.6	0.9	10	1	6769.8	0.997
50	0.6	0.7	1	-1	0.03	0.04	2	0.9	10	1	6035.4	0.99845
50	0.7	0.7	1	-1	0.03	0.04	0.04	0.9	10	1	21680	0.83955
50	0.7	0.7	1	-1	0.03	0.04	0.2	0.9	10	1	17648	0.92464
50	0.7	0.7	1	-1	0.03	0.04	0.8	0.9	10	1	10360	0.98918
50	0.7	0.7	1	-1	0.03	0.04	1.2	0.9	10	1	8533.9	0.99591
50	0.7	0.7	1	-1	0.03	0.04	1.6	0.9	10	1	7401.5	0.99764
50	0.7	0.7	1	-1	0.03	0.04	2	0.9	10	1	6762.8	0.99791
50	0.8	0.7	1	-1	0.03	0.04	0.04	0.9	10	1	17944	0.95291
50	0.8	0.7	1	-1	0.03	0.04	0.2	0.9	10	1	15281	0.97518
50	0.8	0.7	1	-1	0.03	0.04	0.8	0.9	10	1	10780	0.99336
50	0.8	0.7	1	-1	0.03	0.04	1.2	0.9	10	1	9544.9	0.99727
50	0.8	0.7	1	-1	0.03	0.04	1.6	0.9	10	1	8638	0.99845
50	0.8	0.7	1	-1	0.03	0.04	2	0.9	10	1	8097.7	0.99836
50	0.9	0.7	1	-1	0.03	0.04	0.04	0.9	10	1	14168	0.989
50	0.9	0.7	1	-1	0.03	0.04	0.2	0.9	10	1	13529	0.99218
50	0.9	0.7	1	-1	0.03	0.04	0.8	0.9	10	1	12104	0.99436
50	0.9	0.7	1	-1	0.03	0.04	1.2	0.9	10	1	11486	0.99545
50	0.9	0.7	1	-1	0.03	0.04	1.6	0.9	10	1	11165	0.99645
50	0.9	0.7	1	-1	0.03	0.04	2	0.9	10	1	10714	0.99691
50	0.99	0.7	1	-1	0.03	0.04	0.04	0.9	10	1	11278	0.99836
50	0.99	0.7	1	-1	0.03	0.04	0.2	0.9	10	1	13282	0.99464
50	0.99	0.7	1	-1	0.03	0.04	0.8	0.9	10	1	23158	0.93973
50	0.99	0.7	1	-1	0.03	0.04	1.2	0.9	10	1	30680	0.82473
50	0.99	0.7	1	-1	0.03	0.04	1.6	0.9	10	1	33798	0.59709
50	0.99	0.7	1	-1	0.03	0.04	2	0.9	10	1	31738	0.34064
50	0.01	0.8	1	-1	0.03	0.04	0.04	0.1	10	1	7667.1	0.068636
50	0.01	0.8	1	-1	0.03	0.04	0.2	0.1	10	1	7728.8	0.076364
50	0.01	0.8	1	-1	0.03	0.04	0.8	0.1	10	1	8247.4	0.11736
50	0.01	0.8	1	-1	0.03	0.04	1.2	0.1	10	1	8510	0.14173
50	0.01	0.8	1	-1	0.03	0.04	1.6	0.1	10	1	8663.5	0.16682
50	0.01	0.8	1	-1	0.03	0.04	2	0.1	10	1	8916.3	0.191
50	0.1	0.8	1	-1	0.03	0.04	0.04	0.1	10	1	10271	0.14609
50	0.1	0.8	1	-1	0.03	0.04	0.2	0.1	10	1	12280	0.25945
50	0.1	0.8	1	-1	0.03	0.04	0.8	0.1	10	1	12523	0.74182
50	0.1	0.8	1	-1	0.03	0.04	1.2	0.1	10	1	9913.6	0.876
50	0.1	0.8	1	-1	0.03	0.04	1.6	0.1	10	1	8238.7	0.93264
50	0.1	0.8	1	-1	0.03	0.04	2	0.1	10	1	7172.6	0.96073
50	0.2	0.8	1	-1	0.03	0.04	0.04	0.1	10	1	12241	0.18691
50	0.2	0.8	1	-1	0.03	0.04	0.2	0.1	10	1	14581	0.37755
50	0.2	0.8	1	-1	0.03	0.04	0.8	0.1	10	1	10970	0.89355
50	0.2	0.8	1	-1	0.03	0.04	1.2	0.1	10	1	7851.3	0.96364
50	0.2	0.8	1	-1	0.03	0.04	1.6	0.1	10	1	6318.4	0.98436
50	0.2	0.8	1	-1	0.03	0.04	2	0.1	10	1	5364.3	0.99227
50	0.3	0.8	1	-1	0.03	0.04	0.04	0.1	10	1	14679	0.21627
50	0.3	0.8	1	-1	0.03	0.04	0.2	0.1	10	1	16933	0.45145
50	0.3	0.8	1	-1	0.03	0.04	0.8	0.1	10	1	10298	0.93755
50	0.3	0.8	1	-1	0.03	0.04	1.2	0.1	10	1	7249	0.98145
50	0.3	0.8	1	-1	0.03	0.04	1.6	0.1	10	1	5803.7	0.99264
50	0.3	0.8	1	-1	0.03	0.04	2	0.1	10	1	4980.4	0.99755
50	0.4	0.8	1	-1	0.03	0.04	0.04	0.1	10	1	17034	0.24945
50	0.4	0.8	1	-1	0.03	0.04	0.2	0.1	10	1	19519	0.51291
50	0.4	0.8	1	-1	0.03	0.04	0.8	0.1	10	1	10707	0.95564
50	0.4	0.8	1	-1	0.03	0.04	1.2	0.1	10	1	7543.6	0.98809
50	0.4	0.8	1	-1	0.03	0.04	1.6	0.1	10	1	6029.6	0.99555
50	0.4	0.8	1	-1	0.03	0.04	2	0.1	10	1	5080.7	0.99836
50	0.5	0.8	1	-1	0.03	0.04	0.04	0.1	10	1	19938	0.27382
50	0.5	0.8	1	-1	0.03	0.04	0.2	0.1	10	1	22233	0.54155
50	0.5	0.8	1	-1	0.03	0.04	0.8	0.1	10	1	11745	0.96173
50	0.5	0.8	1	-1	0.03	0.04	1.2	0.1	10	1	8249.8	0.99127
50	0.5	0.8	1	-1	0.03	0.04	1.6	0.1	10	1	6577.1	0.996
50	0.5	0.8	1	-1	0.03	0.04	2	0.1	10	1	5640.8	0.99891
50	0.6	0.8	1	-1	0.03	0.04	0.04	0.1	10	1	23553	0.29509
50	0.6	0.8	1	-1	0.03	0.04	0.2	0.1	10	1	25265	0.55355
50	0.6	0.8	1	-1	0.03	0.04	0.8	0.1	10	1	13805	0.96609
50	0.6	0.8	1	-1	0.03	0.04	1.2	0.1	10	1	9782.5	0.98982
50	0.6	0.8	1	-1	0.03	0.04	1.6	0.1	10	1	7713	0.99691
50	0.6	0.8	1	-1	0.03	0.04	2	0.1	10	1	6607.4	0.99845
50	0.7	0.8	1	-1	0.03	0.04	0.04	0.1	10	1	29088	0.32482
50	0.7	0.8	1	-1	0.03	0.04	0.2	0.1	10	1	30064	0.56327
50	0.7	0.8	1	-1	0.03	0.04	0.8	0.1	10	1	17179	0.95473
50	0.7	0.8	1	-1	0.03	0.04	1.2	0.1	10	1	12211	0.99009
50	0.7	0.8	1	-1	0.03	0.04	1.6	0.1	10	1	9754.5	0.99545
50	0.7	0.8	1	-1	0.03	0.04	2	0.1	10	1	8358.7	0.99782
50	0.8	0.8	1	-1	0.03	0.04	0.04	0.1	10	1	35551	0.34155
50	0.8	0.8	1	-1	0.03	0.04	0.2	0.1	10	1	37111	0.55764
50	0.8	0.8	1	-1	0.03	0.04	0.8	0.1	10	1	23406	0.93745
50	0.8	0.8	1	-1	0.03	0.04	1.2	0.1	10	1	17245	0.98127
50	0.8	0.8	1	-1	0.03	0.04	1.6	0.1	10	1	13924	0.992
50	0.8	0.8	1	-1	0.03	0.04	2	0.1	10	1	11802	0.99645
50	0.9	0.8	1	-1	0.03	0.04	0.04	0.1	10	1	45967	0.36455
50	0.9	0.8	1	-1	0.03	0.04	0.2	0.1	10	1	47826	0.49727
50	0.9	0.8	1	-1	0.03	0.04	0.8	0.1	10	1	37331	0.86027
50	0.9	0.8	1	-1	0.03	0.04	1.2	0.1	10	1	29937	0.93518
50	0.9	0.8	1	-1	0.03	0.04	1.6	0.1	10	1	24537	0.96909
50	0.9	0.8	1	-1	0.03	0.04	2	0.1	10	1	21085	0.98445
50	0.99	0.8	1	-1	0.03	0.04	0.04	0.1	10	1	60830	0.366
50	0.99	0.8	1	-1	0.03	0.04	0.2	0.1	10	1	56752	0.28782
50	0.99	0.8	1	-1	0.03	0.04	0.8	0.1	10	1	42514	0.115
50	0.99	0.8	1	-1	0.03	0.04	1.2	0.1	10	1	32512	0.058
50	0.99	0.8	1	-1	0.03	0.04	1.6	0.1	10	1	26288	0.030455
50	0.99	0.8	1	-1	0.03	0.04	2	0.1	10	1	21752	0.020273
50	0.01	0.8	1	-1	0.03	0.04	0.04	0.5	10	1	1212.5	0
50	0.01	0.8	1	-1	0.03	0.04	0.2	0.5	10	1	1236.9	0
50	0.01	0.8	1	-1	0.03	0.04	0.8	0.5	10	1	1400	0.00027273
50	0.01	0.8	1	-1	0.03	0.04	1.2	0.5	10	1	1532.2	0.00054545
50	0.01	0.8	1	-1	0.03	0.04	1.6	0.5	10	1	1672.7	0.00081818
50	0.01	0.8	1	-1	0.03	0.04	2	0.5	10	1	1838	0.0017273
50	0.1	0.8	1	-1	0.03	0.04	0.04	0.5	10	1	2639.4	0.0007
50	0.1	0.8	1	-1	0.03	0.04	0.2	0.5	10	1	3383.4	0.0027273
50	0.1	0.8	1	-1	0.03	0.04	0.8	0.5	10	1	8528.7	0.10436
50	0.1	0.8	1	-1	0.03	0.04	1.2	0.5	10	1	12317	0.38836
50	0.1	0.8	1	-1	0.03	0.04	1.6	0.5	10	1	12374	0.66245
50	0.1	0.8	1	-1	0.03	0.04	2	0.5	10	1	10750	0.81336
50	0.2	0.8	1	-1	0.03	0.04	0.04	0.5	10	1	4345.4	0.007
50	0.2	0.8	1	-1	0.03	0.04	0.2	0.5	10	1	6323.7	0.023818
50	0.2	0.8	1	-1	0.03	0.04	0.8	0.5	10	1	14643	0.55536
50	0.2	0.8	1	-1	0.03	0.04	1.2	0.5	10	1	11719	0.85627
50	0.2	0.8	1	-1	0.03	0.04	1.6	0.5	10	1	8772.9	0.94527
50	0.2	0.8	1	-1	0.03	0.04	2	0.5	10	1	7048.9	0.97255
50	0.3	0.8	1	-1	0.03	0.04	0.04	0.5	10	1	6837.5	0.017
50	0.3	0.8	1	-1	0.03	0.04	0.2	0.5	10	1	10533	0.086273
50	0.3	0.8	1	-1	0.03	0.04	0.8	0.5	10	1	14268	0.80873
50	0.3	0.8	1	-1	0.03	0.04	1.2	0.5	10	1	9586.9	0.94755
50	0.3	0.8	1	-1	0.03	0.04	1.6	0.5	10	1	7182.2	0.981
50	0.3	0.8	1	-1	0.03	0.04	2	0.5	10	1	5866.3	0.99255
50	0.4	0.8	1	-1	0.03	0.04	0.04	0.5	10	1	10259	0.049545
50	0.4	0.8	1	-1	0.03	0.04	0.2	0.5	10	1	15685	0.18736
50	0.4	0.8	1	-1	0.03	0.04	0.8	0.5	10	1	13333	0.90364
50	0.4	0.8	1	-1	0.03	0.04	1.2	0.5	10	1	8977	0.97836
50	0.4	0.8	1	-1	0.03	0.04	1.6	0.5	10	1	6801.8	0.99155
50	0.4	0.8	1	-1	0.03	0.04	2	0.5	10	1	5648.4	0.99673
50	0.5	0.8	1	-1	0.03	0.04	0.04	0.5	10	1	14921	0.107
50	0.5	0.8	1	-1	0.03	0.04	0.2	0.5	10	1	20832	0.32309
50	0.5	0.8	1	-1	0.03	0.04	0.8	0.5	10	1	13290	0.94691
50	0.5	0.8	1	-1	0.03	0.04	1.2	0.5	10	1	9191.2	0.98755
50	0.5	0.8	1	-1	0.03	0.04	1.6	0.5	10	1	6924.3	0.99391
50	0.5	0.8	1	-1	0.03	0.04	2	0.5	10	1	5918.7	0.99864
50	0.6	0.8	1	-1	0.03	0.04	0.04	0.5	10	1	20970	0.19227
50	0.6	0.8	1	-1	0.03	0.04	0.2	0.5	10	1	26065	0.47427
50	0.6	0.8	1	-1	0.03	0.04	0.8	0.5	10	1	14104	0.96155
50	0.6	0.8	1	-1	0.03	0.04	1.2	0.5	10	1	9900.9	0.99118
50	0.6	0.8	1	-1	0.03	0.04	1.6	0.5	10	1	7749.4	0.99755
50	0.6	0.8	1	-1	0.03	0.04	2	0.5	10	1	6668.1	0.99855
50	0.7	0.8	1	-1	0.03	0.04	0.04	0.5	10	1	28355	0.32518
50	0.7	0.8	1	-1	0.03	0.04	0.2	0.5	10	1	30315	0.59345
50	0.7	0.8	1	-1	0.03	0.04	0.8	0.5	10	1	15766	0.96755
50	0.7	0.8	1	-1	0.03	0.04	1.2	0.5	10	1	11377	0.99082
50	0.7	0.8	1	-1	0.03	0.04	1.6	0.5	10	1	9249.3	0.99682
50	0.7	0.8	1	-1	0.03	0.04	2	0.5	10	1	7930.4	0.99818
50	0.8	0.8	1	-1	0.03	0.04	0.04	0.5	10	1	36709	0.49736
50	0.8	0.8	1	-1	0.03	0.04	0.2	0.5	10	1	34912	0.706
50	0.8	0.8	1	-1	0.03	0.04	0.8	0.5	10	1	19359	0.96864
50	0.8	0.8	1	-1	0.03	0.04	1.2	0.5	10	1	14661	0.98827
50	0.8	0.8	1	-1	0.03	0.04	1.6	0.5	10	1	12199	0.99691
50	0.8	0.8	1	-1	0.03	0.04	2	0.5	10	1	10612	0.99809
50	0.9	0.8	1	-1	0.03	0.04	0.04	0.5	10	1	45390	0.69427
50	0.9	0.8	1	-1	0.03	0.04	0.2	0.5	10	1	40922	0.79727
50	0.9	0.8	1	-1	0.03	0.04	0.8	0.5	10	1	26732	0.95236
50	0.9	0.8	1	-1	0.03	0.04	1.2	0.5	10	1	22112	0.98127
50	0.9	0.8	1	-1	0.03	0.04	1.6	0.5	10	1	18906	0.98755
50	0.9	0.8	1	-1	0.03	0.04	2	0.5	10	1	16989	0.99327
50	0.99	0.8	1	-1	0.03	0.04	0.04	0.5	10	1	47818	0.86191
50	0.99	0.8	1	-1	0.03	0.04	0.2	0.5	10	1	52285	0.78682
50	0.99	0.8	1	-1	0.03	0.04	0.8	0.5	10	1	56653	0.47909
50	0.99	0.8	1	-1	0.03	0.04	1.2	0.5	10	1	51471	0.29182
50	0.99	0.8	1	-1	0.03	0.04	1.6	0.5	10	1	41540	0.16445
50	0.99	0.8	1	-1	0.03	0.04	2	0.5	10	1	33409	0.090909
50	0.01	0.8	1	-1	0.03	0.04	0.04	0.9	10	1	333.51	0
50	0.01	0.8	1	-1	0.03	0.04	0.2	0.9	10	1	344.8	0
50	0.01	0.8	1	-1	0.03	0.04	0.8	0.9	10	1	394.17	0
50	0.01	0.8	1	-1	0.03	0.04	1.2	0.9	10	1	428.27	0
50	0.01	0.8	1	-1	0.03	0.04	1.6	0.9	10	1	474.71	0
50	0.01	0.8	1	-1	0.03	0.04	2	0.9	10	1	514.17	0
50	0.1	0.8	1	-1	0.03	0.04	0.04	0.9	10	1	742.4	0
50	0.1	0.8	1	-1	0.03	0.04	0.2	0.9	10	1	870.25	0
50	0.1	0.8	1	-1	0.03	0.04	0.8	0.9	10	1	1829.9	0.00072727
50	0.1	0.8	1	-1	0.03	0.04	1.2	0.9	10	1	3594.8	0.0092727
50	0.1	0.8	1	-1	0.03	0.04	1.6	0.9	10	1	7148.8	0.094727
50	0.1	0.8	1	-1	0.03	0.04	2	0.9	10	1	10924	0.31491
50	0.2	0.8	1	-1	0.03	0.04	0.04	0.9	10	1	1340.4	9.09E-05
50	0.2	0.8	1	-1	0.03	0.04	0.2	0.9	10	1	1796.7	0.00018182
50	0.2	0.8	1	-1	0.03	0.04	0.8	0.9	10	1	7529.7	0.063
50	0.2	0.8	1	-1	0.03	0.04	1.2	0.9	10	1	13854	0.45009
50	0.2	0.8	1	-1	0.03	0.04	1.6	0.9	10	1	12328	0.78791
50	0.2	0.8	1	-1	0.03	0.04	2	0.9	10	1	9689.6	0.906
50	0.3	0.8	1	-1	0.03	0.04	0.04	0.9	10	1	2382.6	0.00036364
50	0.3	0.8	1	-1	0.03	0.04	0.2	0.9	10	1	3583.6	0.0031818
50	0.3	0.8	1	-1	0.03	0.04	0.8	0.9	10	1	15999	0.44236
50	0.3	0.8	1	-1	0.03	0.04	1.2	0.9	10	1	12974	0.84855
50	0.3	0.8	1	-1	0.03	0.04	1.6	0.9	10	1	9478	0.95
50	0.3	0.8	1	-1	0.03	0.04	2	0.9	10	1	7291	0.97673
50	0.4	0.8	1	-1	0.03	0.04	0.04	0.9	10	1	4257.2	0.0030909
50	0.4	0.8	1	-1	0.03	0.04	0.2	0.9	10	1	7254.5	0.023091
50	0.4	0.8	1	-1	0.03	0.04	0.8	0.9	10	1	16983	0.77527
50	0.4	0.8	1	-1	0.03	0.04	1.2	0.9	10	1	11129	0.94727
50	0.4	0.8	1	-1	0.03	0.04	1.6	0.9	10	1	7988	0.98173
50	0.4	0.8	1	-1	0.03	0.04	2	0.9	10	1	6469.9	0.992
50	0.5	0.8	1	-1	0.03	0.04	0.04	0.9	10	1	8103.5	0.021
50	0.5	0.8	1	-1	0.03	0.04	0.2	0.9	10	1	14463	0.11191
50	0.5	0.8	1	-1	0.03	0.04	0.8	0.9	10	1	15431	0.907
50	0.5	0.8	1	-1	0.03	0.04	1.2	0.9	10	1	10099	0.978
50	0.5	0.8	1	-1	0.03	0.04	1.6	0.9	10	1	7660.1	0.99227
50	0.5	0.8	1	-1	0.03	0.04	2	0.9	10	1	6329.3	0.99691
50	0.6	0.8	1	-1	0.03	0.04	0.04	0.9	10	1	16264	0.096909
50	0.6	0.8	1	-1	0.03	0.04	0.2	0.9	10	1	24020	0.349
50	0.6	0.8	1	-1	0.03	0.04	0.8	0.9	10	1	14575	0.95773
50	0.6	0.8	1	-1	0.03	0.04	1.2	0.9	10	1	10142	0.98964
50	0.6	0.8	1	-1	0.03	0.04	1.6	0.9	10	1	7900	0.99609
50	0.6	0.8	1	-1	0.03	0.04	2	0.9	10	1	6718.4	0.99855
50	0.7	0.8	1	-1	0.03	0.04	0.04	0.9	10	1	28151	0.33591
50	0.7	0.8	1	-1	0.03	0.04	0.2	0.9	10	1	29849	0.65264
50	0.7	0.8	1	-1	0.03	0.04	0.8	0.9	10	1	14764	0.97618
50	0.7	0.8	1	-1	0.03	0.04	1.2	0.9	10	1	10729	0.99382
50	0.7	0.8	1	-1	0.03	0.04	1.6	0.9	10	1	8805.8	0.99755
50	0.7	0.8	1	-1	0.03	0.04	2	0.9	10	1	7693.8	0.99864
50	0.8	0.8	1	-1	0.03	0.04	0.04	0.9	10	1	35062	0.70264
50	0.8	0.8	1	-1	0.03	0.04	0.2	0.9	10	1	29294	0.85355
50	0.8	0.8	1	-1	0.03	0.04	0.8	0.9	10	1	15911	0.98418
50	0.8	0.8	1	-1	0.03	0.04	1.2	0.9	10	1	12515	0.99473
50	0.8	0.8	1	-1	0.03	0.04	1.6	0.9	10	1	10799	0.99764
50	0.8	0.8	1	-1	0.03	0.04	2	0.9	10	1	9540.9	0.99855
50	0.9	0.8	1	-1	0.03	0.04	0.04	0.9	10	1	31373	0.92027
50	0.9	0.8	1	-1	0.03	0.04	0.2	0.9	10	1	27347	0.95282
50	0.9	0.8	1	-1	0.03	0.04	0.8	0.9	10	1	19607	0.98891
50	0.9	0.8	1	-1	0.03	0.04	1.2	0.9	10	1	16343	0.99473
50	0.9	0.8	1	-1	0.03	0.04	1.6	0.9	10	1	14935	0.99618
50	0.9	0.8	1	-1	0.03	0.04	2	0.9	10	1	13631	0.9986
50	0.99	0.8	1	-1	0.03	0.04	0.04	0.9	10	1	23833	0.98982
50	0.99	0.8	1	-1	0.03	0.04	0.2	0.9	10	1	27266	0.97991
50	0.99	0.8	1	-1	0.03	0.04	0.8	0.9	10	1	40886	0.88591
50	0.99	0.8	1	-1	0.03	0.04	1.2	0.9	10	1	49170	0.76018
50	0.99	0.8	1	-1	0.03	0.04	1.6	0.9	10	1	52385	0.57527
50	0.99	0.8	1	-1	0.03	0.04	2	0.9	10	1	48155	0.381
50	0.01	0.9	1	-1	0.03	0.04	0.04	0.1	10	1	7187.1	0.050182
50	0.01	0.9	1	-1	0.03	0.04	0.2	0.1	10	1	7224.7	0.059909
50	0.01	0.9	1	-1	0.03	0.04	0.8	0.1	10	1	7588.3	0.085182
50	0.01	0.9	1	-1	0.03	0.04	1.2	0.1	10	1	7781.5	0.102
50	0.01	0.9	1	-1	0.03	0.04	1.6	0.1	10	1	7957.4	0.1171
50	0.01	0.9	1	-1	0.03	0.04	2	0.1	10	1	8019.6	0.12045
50	0.1	0.9	1	-1	0.03	0.04	0.04	0.1	10	1	9857	0.11036
50	0.1	0.9	1	-1	0.03	0.04	0.2	0.1	10	1	12063	0.22327
50	0.1	0.9	1	-1	0.03	0.04	0.8	0.1	10	1	12659	0.74027
50	0.1	0.9	1	-1	0.03	0.04	1.2	0.1	10	1	10154	0.88064
50	0.1	0.9	1	-1	0.03	0.04	1.6	0.1	10	1	8463.9	0.94127
50	0.1	0.9	1	-1	0.03	0.04	2	0.1	10	1	7166	0.96282
50	0.2	0.9	1	-1	0.03	0.04	0.04	0.1	10	1	12202	0.15136
50	0.2	0.9	1	-1	0.03	0.04	0.2	0.1	10	1	15232	0.34609
50	0.2	0.9	1	-1	0.03	0.04	0.8	0.1	10	1	10708	0.91309
50	0.2	0.9	1	-1	0.03	0.04	1.2	0.1	10	1	7513.6	0.97364
50	0.2	0.9	1	-1	0.03	0.04	1.6	0.1	10	1	5946.2	0.98773
50	0.2	0.9	1	-1	0.03	0.04	2	0.1	10	1	5051.8	0.99509
50	0.3	0.9	1	-1	0.03	0.04	0.04	0.1	10	1	14491	0.18845
50	0.3	0.9	1	-1	0.03	0.04	0.2	0.1	10	1	17725	0.42627
50	0.3	0.9	1	-1	0.03	0.04	0.8	0.1	10	1	9910.1	0.95745
50	0.3	0.9	1	-1	0.03	0.04	1.2	0.1	10	1	6797.8	0.98827
50	0.3	0.9	1	-1	0.03	0.04	1.6	0.1	10	1	5275.5	0.99664
50	0.3	0.9	1	-1	0.03	0.04	2	0.1	10	1	4483.2	0.999
50	0.4	0.9	1	-1	0.03	0.04	0.04	0.1	10	1	17617	0.20945
50	0.4	0.9	1	-1	0.03	0.04	0.2	0.1	10	1	20176	0.49482
50	0.4	0.9	1	-1	0.03	0.04	0.8	0.1	10	1	10088	0.97327
50	0.4	0.9	1	-1	0.03	0.04	1.2	0.1	10	1	6874.2	0.994
50	0.4	0.9	1	-1	0.03	0.04	1.6	0.1	10	1	5333.5	0.998
50	0.4	0.9	1	-1	0.03	0.04	2	0.1	10	1	4502.8	0.99882
50	0.5	0.9	1	-1	0.03	0.04	0.04	0.1	10	1	21053	0.23491
50	0.5	0.9	1	-1	0.03	0.04	0.2	0.1	10	1	24336	0.53345
50	0.5	0.9	1	-1	0.03	0.04	0.8	0.1	10	1	11130	0.97809
50	0.5	0.9	1	-1	0.03	0.04	1.2	0.1	10	1	7439.8	0.99645
50	0.5	0.9	1	-1	0.03	0.04	1.6	0.1	10	1	5786.3	0.99909
50	0.5	0.9	1	-1	0.03	0.04	2	0.1	10	1	4866.1	0.99973
50	0.6	0.9	1	-1	0.03	0.04	0.04	0.1	10	1	25864	0.25945
50	0.6	0.9	1	-1	0.03	0.04	0.2	0.1	10	1	28601	0.556
50	0.6	0.9	1	-1	0.03	0.04	0.8	0.1	10	1	12952	0.97991
50	0.6	0.9	1	-1	0.03	0.04	1.2	0.1	10	1	8623.4	0.99582
50	0.6	0.9	1	-1	0.03	0.04	1.6	0.1	10	1	6873.3	0.99845
50	0.6	0.9	1	-1	0.03	0.04	2	0.1	10	1	5754.5	0.99945
50	0.7	0.9	1	-1	0.03	0.04	0.04	0.1	10	1	33451	0.27255
50	0.7	0.9	1	-1	0.03	0.04	0.2	0.1	10	1	35824	0.56864
50	0.7	0.9	1	-1	0.03	0.04	0.8	0.1	10	1	16727	0.97582
50	0.7	0.9	1	-1	0.03	0.04	1.2	0.1	10	1	11300	0.99609
50	0.7	0.9	1	-1	0.03	0.04	1.6	0.1	10	1	8811.4	0.99773
50	0.7	0.9	1	-1	0.03	0.04	2	0.1	10	1	7427.4	0.99955
50	0.8	0.9	1	-1	0.03	0.04	0.04	0.1	10	1	43645	0.29764
50	0.8	0.9	1	-1	0.03	0.04	0.2	0.1	10	1	47806	0.55073
50	0.8	0.9	1	-1	0.03	0.04	0.8	0.1	10	1	24530	0.96855
50	0.8	0.9	1	-1	0.03	0.04	1.2	0.1	10	1	16627	0.99373
50	0.8	0.9	1	-1	0.03	0.04	1.6	0.1	10	1	13075	0.99818
50	0.8	0.9	1	-1	0.03	0.04	2	0.1	10	1	11068	0.99873
50	0.9	0.9	1	-1	0.03	0.04	0.04	0.1	10	1	67074	0.31755
50	0.9	0.9	1	-1	0.03	0.04	0.2	0.1	10	1	69319	0.50709
50	0.9	0.9	1	-1	0.03	0.04	0.8	0.1	10	1	47332	0.91873
50	0.9	0.9	1	-1	0.03	0.04	1.2	0.1	10	1	34000	0.97436
50	0.9	0.9	1	-1	0.03	0.04	1.6	0.1	10	1	26396	0.98964
50	0.9	0.9	1	-1	0.03	0.04	2	0.1	10	1	22147	0.99636
50	0.99	0.9	1	-1	0.03	0.04	0.04	0.1	10	1	1.13E+05	0.31664
50	0.99	0.9	1	-1	0.03	0.04	0.2	0.1	10	1	1.10E+05	0.28745
50	0.99	0.9	1	-1	0.03	0.04	0.8	0.1	10	1	94009	0.18364
50	0.99	0.9	1	-1	0.03	0.04	1.2	0.1	10	1	83596	0.13391
50	0.99	0.9	1	-1	0.03	0.04	1.6	0.1	10	1	74637	0.10373
50	0.99	0.9	1	-1	0.03	0.04	2	0.1	10	1	65314	0.074818
50	0.01	0.9	1	-1	0.03	0.04	0.04	0.5	10	1	1085.2	0
50	0.01	0.9	1	-1	0.03	0.04	0.2	0.5	10	1	1105.6	0
50	0.01	0.9	1	-1	0.03	0.04	0.8	0.5	10	1	1200.3	0
50	0.01	0.9	1	-1	0.03	0.04	1.2	0.5	10	1	1295.1	0
50	0.01	0.9	1	-1	0.03	0.04	1.6	0.5	10	1	1374.6	0.00018182
50	0.01	0.9	1	-1	0.03	0.04	2	0.5	10	1	1482.3	0.00072727
50	0.1	0.9	1	-1	0.03	0.04	0.04	0.5	10	1	2139.5	0.00063636
50	0.1	0.9	1	-1	0.03	0.04	0.2	0.5	10	1	2550.8	0.00063636
50	0.1	0.9	1	-1	0.03	0.04	0.8	0.5	10	1	6330.4	0.036455
50	0.1	0.9	1	-1	0.03	0.04	1.2	0.5	10	1	10944	0.20464
50	0.1	0.9	1	-1	0.03	0.04	1.6	0.5	10	1	13273	0.50682
50	0.1	0.9	1	-1	0.03	0.04	2	0.5	10	1	12141	0.72173
50	0.2	0.9	1	-1	0.03	0.04	0.04	0.5	10	1	3312.6	0.00081818
50	0.2	0.9	1	-1	0.03	0.04	0.2	0.5	10	1	4619.1	0.0054545
50	0.2	0.9	1	-1	0.03	0.04	0.8	0.5	10	1	14314	0.359
50	0.2	0.9	1	-1	0.03	0.04	1.2	0.5	10	1	13547	0.77709
50	0.2	0.9	1	-1	0.03	0.04	1.6	0.5	10	1	9874.1	0.92236
50	0.2	0.9	1	-1	0.03	0.04	2	0.5	10	1	7581.3	0.96573
50	0.3	0.9	1	-1	0.03	0.04	0.04	0.5	10	1	4992.4	0.0049091
50	0.3	0.9	1	-1	0.03	0.04	0.2	0.5	10	1	7475.4	0.022909
50	0.3	0.9	1	-1	0.03	0.04	0.8	0.5	10	1	16779	0.70309
50	0.3	0.9	1	-1	0.03	0.04	1.2	0.5	10	1	11002	0.93855
50	0.3	0.9	1	-1	0.03	0.04	1.6	0.5	10	1	7697.1	0.98073
50	0.3	0.9	1	-1	0.03	0.04	2	0.5	10	1	5931.1	0.99318
50	0.4	0.9	1	-1	0.03	0.04	0.04	0.5	10	1	7152.6	0.012
50	0.4	0.9	1	-1	0.03	0.04	0.2	0.5	10	1	11336	0.057182
50	0.4	0.9	1	-1	0.03	0.04	0.8	0.5	10	1	16254	0.85427
50	0.4	0.9	1	-1	0.03	0.04	1.2	0.5	10	1	9905.6	0.97427
50	0.4	0.9	1	-1	0.03	0.04	1.6	0.5	10	1	6945.3	0.99473
50	0.4	0.9	1	-1	0.03	0.04	2	0.5	10	1	5584.4	0.99809
50	0.5	0.9	1	-1	0.03	0.04	0.04	0.5	10	1	10311	0.026636
50	0.5	0.9	1	-1	0.03	0.04	0.2	0.5	10	1	17056	0.11836
50	0.5	0.9	1	-1	0.03	0.04	0.8	0.5	10	1	15767	0.92191
50	0.5	0.9	1	-1	0.03	0.04	1.2	0.5	10	1	9696.5	0.98627
50	0.5	0.9	1	-1	0.03	0.04	1.6	0.5	10	1	7179.2	0.99682
50	0.5	0.9	1	-1	0.03	0.04	2	0.5	10	1	5770.3	0.99909
50	0.6	0.9	1	-1	0.03	0.04	0.04	0.5	10	1	15442	0.047636
50	0.6	0.9	1	-1	0.03	0.04	0.2	0.5	10	1	24055	0.20745
50	0.6	0.9	1	-1	0.03	0.04	0.8	0.5	10	1	17221	0.94909
50	0.6	0.9	1	-1	0.03	0.04	1.2	0.5	10	1	10695	0.99255
50	0.6	0.9	1	-1	0.03	0.04	1.6	0.5	10	1	7961.7	0.99773
50	0.6	0.9	1	-1	0.03	0.04	2	0.5	10	1	6490.6	0.999
50	0.7	0.9	1	-1	0.03	0.04	0.04	0.5	10	1	24298	0.097091
50	0.7	0.9	1	-1	0.03	0.04	0.2	0.5	10	1	34074	0.30973
50	0.7	0.9	1	-1	0.03	0.04	0.8	0.5	10	1	19970	0.96127
50	0.7	0.9	1	-1	0.03	0.04	1.2	0.5	10	1	12712	0.99355
50	0.7	0.9	1	-1	0.03	0.04	1.6	0.5	10	1	9658.7	0.99855
50	0.7	0.9	1	-1	0.03	0.04	2	0.5	10	1	8072.1	0.999
50	0.8	0.9	1	-1	0.03	0.04	0.04	0.5	10	1	39197	0.18927
50	0.8	0.9	1	-1	0.03	0.04	0.2	0.5	10	1	47496	0.44255
50	0.8	0.9	1	-1	0.03	0.04	0.8	0.5	10	1	26388	0.96255
50	0.8	0.9	1	-1	0.03	0.04	1.2	0.5	10	1	17459	0.99164
50	0.8	0.9	1	-1	0.03	0.04	1.6	0.5	10	1	13464	0.99745
50	0.8	0.9	1	-1	0.03	0.04	2	0.5	10	1	11085	0.99873
50	0.9	0.9	1	-1	0.03	0.04	0.04	0.5	10	1	67739	0.3611
50	0.9	0.9	1	-1	0.03	0.04	0.2	0.5	10	1	68385	0.57664
50	0.9	0.9	1	-1	0.03	0.04	0.8	0.5	10	1	43263	0.94691
50	0.9	0.9	1	-1	0.03	0.04	1.2	0.5	10	1	31124	0.982
50	0.9	0.9	1	-1	0.03	0.04	1.6	0.5	10	1	24718	0.99282
50	0.9	0.9	1	-1	0.03	0.04	2	0.5	10	1	20849	0.99736
50	0.99	0.9	1	-1	0.03	0.04	0.04	0.5	10	1	1.15E+05	0.64627
50	0.99	0.9	1	-1	0.03	0.04	0.2	0.5	10	1	1.13E+05	0.59655
50	0.99	0.9	1	-1	0.03	0.04	0.8	0.5	10	1	1.11E+05	0.42591
50	0.99	0.9	1	-1	0.03	0.04	1.2	0.5	10	1	1.03E+05	0.33427
50	0.99	0.9	1	-1	0.03	0.04	1.6	0.5	10	1	93453	0.24945
50	0.99	0.9	1	-1	0.03	0.04	2	0.5	10	1	85387	0.18482
50	0.01	0.9	1	-1	0.03	0.04	0.04	0.9	10	1	330.9	0
50	0.01	0.9	1	-1	0.03	0.04	0.2	0.9	10	1	342.97	0
50	0.01	0.9	1	-1	0.03	0.04	0.8	0.9	10	1	382.34	0
50	0.01	0.9	1	-1	0.03	0.04	1.2	0.9	10	1	411.3	0
50	0.01	0.9	1	-1	0.03	0.04	1.6	0.9	10	1	441.27	0
50	0.01	0.9	1	-1	0.03	0.04	2	0.9	10	1	477.19	0
50	0.1	0.9	1	-1	0.03	0.04	0.04	0.9	10	1	669.04	0
50	0.1	0.9	1	-1	0.03	0.04	0.2	0.9	10	1	766.24	0
50	0.1	0.9	1	-1	0.03	0.04	0.8	0.9	10	1	1387.4	0.0001
50	0.1	0.9	1	-1	0.03	0.04	1.2	0.9	10	1	2274.5	0.0012727
50	0.1	0.9	1	-1	0.03	0.04	1.6	0.9	10	1	4185.5	0.014545
50	0.1	0.9	1	-1	0.03	0.04	2	0.9	10	1	7503.8	0.096
50	0.2	0.9	1	-1	0.03	0.04	0.04	0.9	10	1	1096	0
50	0.2	0.9	1	-1	0.03	0.04	0.2	0.9	10	1	1367.5	9.09E-05
50	0.2	0.9	1	-1	0.03	0.04	0.8	0.9	10	1	4180.9	0.0071818
50	0.2	0.9	1	-1	0.03	0.04	1.2	0.9	10	1	10623	0.13564
50	0.2	0.9	1	-1	0.03	0.04	1.6	0.9	10	1	14863	0.55355
50	0.2	0.9	1	-1	0.03	0.04	2	0.9	10	1	12094	0.82636
50	0.3	0.9	1	-1	0.03	0.04	0.04	0.9	10	1	1719.8	0
50	0.3	0.9	1	-1	0.03	0.04	0.2	0.9	10	1	2304.4	0.00018182
50	0.3	0.9	1	-1	0.03	0.04	0.8	0.9	10	1	11139	0.103
50	0.3	0.9	1	-1	0.03	0.04	1.2	0.9	10	1	16872	0.63709
50	0.3	0.9	1	-1	0.03	0.04	1.6	0.9	10	1	12061	0.90318
50	0.3	0.9	1	-1	0.03	0.04	2	0.9	10	1	8567.2	0.96945
50	0.4	0.9	1	-1	0.03	0.04	0.04	0.9	10	1	2727.5	9.09E-05
50	0.4	0.9	1	-1	0.03	0.04	0.2	0.9	10	1	3910.1	0.0017273
50	0.4	0.9	1	-1	0.03	0.04	0.8	0.9	10	1	19776	0.40818
50	0.4	0.9	1	-1	0.03	0.04	1.2	0.9	10	1	15276	0.87745
50	0.4	0.9	1	-1	0.03	0.04	1.6	0.9	10	1	9881.4	0.974
50	0.4	0.9	1	-1	0.03	0.04	2	0.9	10	1	7172.7	0.99155
50	0.5	0.9	1	-1	0.03	0.04	0.04	0.9	10	1	4324.1	0.00090909
50	0.5	0.9	1	-1	0.03	0.04	0.2	0.9	10	1	7019.3	0.0086364
50	0.5	0.9	1	-1	0.03	0.04	0.8	0.9	10	1	22490	0.70255
50	0.5	0.9	1	-1	0.03	0.04	1.2	0.9	10	1	13732	0.95355
50	0.5	0.9	1	-1	0.03	0.04	1.6	0.9	10	1	9176.1	0.99082
50	0.5	0.9	1	-1	0.03	0.04	2	0.9	10	1	7052.8	0.99673
50	0.6	0.9	1	-1	0.03	0.04	0.04	0.9	10	1	7359.8	0.0034545
50	0.6	0.9	1	-1	0.03	0.04	0.2	0.9	10	1	12676	0.031
50	0.6	0.9	1	-1	0.03	0.04	0.8	0.9	10	1	23177	0.85191
50	0.6	0.9	1	-1	0.03	0.04	1.2	0.9	10	1	13339	0.97964
50	0.6	0.9	1	-1	0.03	0.04	1.6	0.9	10	1	9426.4	0.99591
50	0.6	0.9	1	-1	0.03	0.04	2	0.9	10	1	7402.5	0.99864
50	0.7	0.9	1	-1	0.03	0.04	0.04	0.9	10	1	14496	0.019273
50	0.7	0.9	1	-1	0.03	0.04	0.2	0.9	10	1	24152	0.10282
50	0.7	0.9	1	-1	0.03	0.04	0.8	0.9	10	1	24380	0.92118
50	0.7	0.9	1	-1	0.03	0.04	1.2	0.9	10	1	14840	0.98909
50	0.7	0.9	1	-1	0.03	0.04	1.6	0.9	10	1	10836	0.99636
50	0.7	0.9	1	-1	0.03	0.04	2	0.9	10	1	8659	0.99891
50	0.8	0.9	1	-1	0.03	0.04	0.04	0.9	10	1	31405	0.098909
50	0.8	0.9	1	-1	0.03	0.04	0.2	0.9	10	1	43603	0.31655
50	0.8	0.9	1	-1	0.03	0.04	0.8	0.9	10	1	27865	0.95218
50	0.8	0.9	1	-1	0.03	0.04	1.2	0.9	10	1	18472	0.98964
50	0.8	0.9	1	-1	0.03	0.04	1.6	0.9	10	1	14114	0.99709
50	0.8	0.9	1	-1	0.03	0.04	2	0.9	10	1	11436	0.99891
50	0.9	0.9	1	-1	0.03	0.04	0.04	0.9	10	1	68928	0.44018
50	0.9	0.9	1	-1	0.03	0.04	0.2	0.9	10	1	66665	0.65073
50	0.9	0.9	1	-1	0.03	0.04	0.8	0.9	10	1	38565	0.958
50	0.9	0.9	1	-1	0.03	0.04	1.2	0.9	10	1	28466	0.98573
50	0.9	0.9	1	-1	0.03	0.04	1.6	0.9	10	1	22774	0.99491
50	0.9	0.9	1	-1	0.03	0.04	2	0.9	10	1	19767	0.99755
50	0.99	0.9	1	-1	0.03	0.04	0.04	0.9	10	1	82134	0.89345
50	0.99	0.9	1	-1	0.03	0.04	0.2	0.9	10	1	87488	0.86609
50	0.99	0.9	1	-1	0.03	0.04	0.8	0.9	10	1	1.02E+05	0.73818
50	0.99	0.9	1	-1	0.03	0.04	1.2	0.9	10	1	1.05E+05	0.62664
50	0.99	0.9	1	-1	0.03	0.04	1.6	0.9	10	1	1.04E+05	0.52436
50	0.99	0.9	1	-1	0.03	0.04	2	0.9	10	1	1.01E+05	0.41327
50	0.01	0.99	1	-1	0.03	0.04	0.04	0.1	10	1	6574.6	0.037727
50	0.01	0.99	1	-1	0.03	0.04	0.2	0.1	10	1	6545.3	0.041636
50	0.01	0.99	1	-1	0.03	0.04	0.8	0.1	10	1	6280.8	0.048909
50	0.01	0.99	1	-1	0.03	0.04	1.2	0.1	10	1	6104.1	0.047909
50	0.01	0.99	1	-1	0.03	0.04	1.6	0.1	10	1	6173	0.055727
50	0.01	0.99	1	-1	0.03	0.04	2	0.1	10	1	5962	0.056091
50	0.1	0.99	1	-1	0.03	0.04	0.04	0.1	10	1	9228.8	0.075364
50	0.1	0.99	1	-1	0.03	0.04	0.2	0.1	10	1	11613	0.17327
50	0.1	0.99	1	-1	0.03	0.04	0.8	0.1	10	1	13278	0.70382
50	0.1	0.99	1	-1	0.03	0.04	1.2	0.1	10	1	10639	0.87164
50	0.1	0.99	1	-1	0.03	0.04	1.6	0.1	10	1	8587.8	0.93936
50	0.1	0.99	1	-1	0.03	0.04	2	0.1	10	1	7310.6	0.96336
50	0.2	0.99	1	-1	0.03	0.04	0.04	0.1	10	1	11538	0.10873
50	0.2	0.99	1	-1	0.03	0.04	0.2	0.1	10	1	15185	0.28809
50	0.2	0.99	1	-1	0.03	0.04	0.8	0.1	10	1	10810	0.91555
50	0.2	0.99	1	-1	0.03	0.04	1.2	0.1	10	1	7256	0.98045
50	0.2	0.99	1	-1	0.03	0.04	1.6	0.1	10	1	5583.1	0.99145
50	0.2	0.99	1	-1	0.03	0.04	2	0.1	10	1	4652	0.99664
50	0.3	0.99	1	-1	0.03	0.04	0.04	0.1	10	1	14027	0.13136
50	0.3	0.99	1	-1	0.03	0.04	0.2	0.1	10	1	18099	0.38755
[truncated: 1,388 more rows]
